# Supplementary material for: Intermolecular (4+3) cycloadditions of aziridinyl enolsilanes
Source: Royal Society of Chemistry journal article supplement (doi:10.1039/c3cc48266a), 2013-12-16
Supplement: c3cc48266a.pdf [file c3cc48266a.pdf]

Supplementary Material (ESI) for Chemical Communications  
This journal is (c) The Royal Society of Chemistry 2013

## Electronic Supplementary Information

### Intermolecular (4+3) Cycloadditions of Aziridinyl Enolsilanes

Sze Kui Lam, Sarah Lam, Pauline Chiu\*

*Department of Chemistry, the University of Hong Kong, Pokfulam Road, Hong Kong*

## Table of Contents

|                                                                                                      |      |
|------------------------------------------------------------------------------------------------------|------|
| General Experimental .....                                                                           | S3   |
| Preparation of Aziridinyl Ketones <b>3a-m</b> .....                                                  | S4   |
| Preparation of Aziridinyl Enolsilanes <b>1a-m</b> .....                                              | S16  |
| General Experimental Procedure for (4+3) Cycloadditions.....                                         | S24  |
| (4+3) Cycloadditions of Aziridinyl Enolsilanes <b>1a</b> with furan (Table 1, selected entries)..... | S24  |
| (4+3) Cycloadditions of Aziridinyl Enolsilanes <b>1a-g</b> with Dienes (Table 2) .....               | S27  |
| (4+3) Cycloadditions of Aziridinyl Enolsilanes <b>1h-m</b> with Dienes (Table 3) .....               | S39  |
| Asymmetric (4+3) Cycloadditions of Aziridinyl Enolsilanes.....                                       | S49  |
| NMR Spectra of all new compounds .....                                                               | S55  |
| Chiral HPLC Chromatograms.....                                                                       | S229 |
| X-ray Crystallographic Data of (-)- <b>β-4aa</b> .....                                               | S261 |

## General Experimental

Preparative: All anhydrous reactions were performed in oven-dried round-bottomed flasks under a positive pressure of dry argon. Air and moisture-sensitive compounds were introduced via syringes or cannulae using standard inert atmosphere techniques. Reactions were monitored by thin layer chromatography (TLC) using E. Merck silica gel plates, Kieselgel 60 F<sub>254</sub> with 0.2 mm thickness. Components were visualized by illumination with short-wavelength ultra-violet light and/or staining. Flash column chromatography was performed with E. Merck silica gel 60 (230-400 mesh ASTM). Solvents and chemicals were purified according to standard procedures. All solvents used for reactions were distilled or dried by passing through drying columns. Tetrahydrofuran (THF), dichloromethane (CH<sub>2</sub>Cl<sub>2</sub>), nitroethane (EtNO<sub>2</sub>), furan, 1,1,1,3,3,3-hexamethyldisilazane (HMDS) were distilled from CaH<sub>2</sub> under argon. Cyclopentadiene was prepared from freshly cracking dicyclopentadiene. Other reagents were used as received.

Analytical: <sup>1</sup>H and <sup>13</sup>C NMR nuclear magnetic resonance spectra were recorded in deuteriochloroform (CDCl<sub>3</sub>), with tetramethylsilane (TMS) as an internal standard at ambient temperature on a Bruker DX 300 spectrometer, Bruker Avance 400 spectrometer, Bruker DX 500 spectrometer, or Bruker Avance 600 operating at 300 MHz, 400 MHz, 500 MHz or 600 MHz respectively for <sup>1</sup>H, and at 75 MHz, 100 MHz, 125 MHz or 150 MHz respectively for <sup>13</sup>C. All spectra were calibrated at δ 7.26 or δ 0.00 ppm for <sup>1</sup>H spectra (residual CHCl<sub>3</sub> or TMS respectively), and 77.16 ppm for <sup>13</sup>C spectra. Splitting patterns were designated as follows: s = singlet, d = doublet, t = triplet, q = quartet, m = multiplet, br = broad. IR absorption spectra were recorded as solutions in CH<sub>2</sub>Cl<sub>2</sub> on a Bio-Rad FTS 165 spectrometer from 4000 cm<sup>-1</sup> to 400 cm<sup>-1</sup>. Electron impact mass spectrometry was recorded on a Finnigan MAT 95 mass spectrometer or API QSTAR PULSAR iLC/MS/TOF System for both low resolution and high resolution, with accurate mass reported for the molecular ion (M<sup>+</sup>) or next largest fragment thereof. Analytical HPLC was carried out on a Waters Analytical/Preparative HPLC system equipped with a 1525 Binary Pump, a 2707 Autosampler, and a variable wavelength Waters 2498 UV detector operating with Breeze 2 software. Preparative HPLC was carried out on a Waters HPLC with a 510 HPLC pump and 410 differential refractometer.

## Preparation of Aziridinyl Ketones 3a-m

### Preparation of 3a

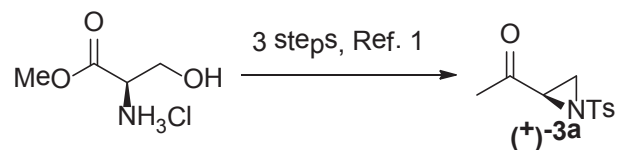

Aziridinyl ketone **3a** was prepared according to literature procedure in 3 steps from D-serine methyl ester hydrochloride.<sup>1</sup> **(R)-1-(1-Tosylaziridin-2-yl)ethanone ((+)-3a)**: White solid;  $R_f = 0.69$  (50% EtOAc in hexane); <sup>1</sup>H NMR (400 MHz, CDCl<sub>3</sub>)  $\delta$  7.81 (d,  $J = 8.0$  Hz, 2H), 7.34 (d,  $J = 8.0$  Hz, 2H), 3.25 (dd,  $J = 7.2, 4.1$  Hz, 1H), 2.77 (d,  $J = 7.4$  Hz, 1H), 2.48 (d,  $J = 4.1$  Hz, 1H), 2.744 (s, 3H), 2.06 (s, 3H) ppm; <sup>13</sup>C NMR (100 MHz, CDCl<sub>3</sub>)  $\delta$  201.6, 145.5, 133.9, 130.1, 128.3, 42.0, 32.0, 26.0, 21.8 ppm. The spectral characteristics corresponded to those of **3a** in the literature.<sup>1</sup> The enantiomeric excess was determined by HPLC analysis [Daicel chiralcel OF, 1.0 mL/min,  $\lambda = 254$  nm, 40% IPA in hexane,  $t_R$ (major) = 20.38 min,  $t_R$ (minor) = 22.66 min] to be 99% ee.

### Preparation of 3b

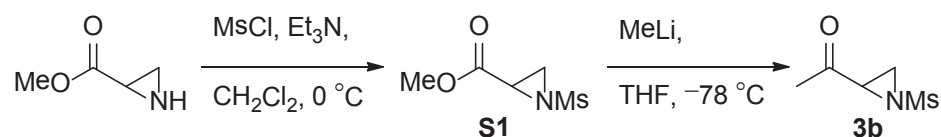

To a solution of methyl aziridine-2-carboxylate (0.4226 g, 4.180 mmol) in CH<sub>2</sub>Cl<sub>2</sub> (50 mL) at 0 °C was added Et<sub>3</sub>N (1.2 mL, 8.6 mmol) and MsCl (0.62 mL, 8.0 mmol). The resulting mixture was stirred for 1 h at 0 °C. The reaction was quenched with aqueous NaHCO<sub>3</sub> and extracted with EtOAc. The combined organic layers were dried over anhydrous MgSO<sub>4</sub>. The volatiles were removed *in vacuo* and the residue was purified by flash column chromatography using 40% EtOAc in hexane to afford **S1** (0.7463 g, 99% yield). **Methyl 1-(methylsulfonyl)aziridine-2-carboxylate (S1)**: Colourless oil;  $R_f = 0.48$  (50% EtOAc in hexane); <sup>1</sup>H NMR (400 MHz, C<sub>6</sub>D<sub>6</sub>)  $\delta$  3.25 (s, 3H), 3.13 (dd,  $J = 7.1, 4.1$  Hz, 1H), 2.43 (s, 3H), 2.30 (d,  $J = 7.1$  Hz, 1H), 2.14 (d,  $J = 4.1$  Hz, 1H) ppm; <sup>13</sup>C NMR (100 MHz, C<sub>6</sub>D<sub>6</sub>)  $\delta$  167.1, 52.2, 38.9, 35.2, 31.1 ppm; IR (CH<sub>2</sub>Cl<sub>2</sub>) 3058, 2956, 1755 (C=O), 1444, 1394 cm<sup>-1</sup>; LRMS (EI, 20 eV)  $m/z$  148 (M<sup>+</sup>-OCH<sub>3</sub>, 18), 120 (59), 100 (100), 79 (62), 72 (19); HRMS (EI, 20 eV) Calculated for C<sub>5</sub>H<sub>9</sub>NO<sub>4</sub>S (M<sup>+</sup>-OCH<sub>3</sub>) 148.0063, Found 148.0075.

To a solution of **S1** (1.605 g, 8.968 mmol) in anhydrous THF (90 mL) at -78 °C was added 1.45 M

<sup>1</sup> A. B. Smith, III, D.-S. Kim, *Org. Lett.* 2005, **7**, 3247.

Supplementary Material (ESI) for Chemical Communications  
This journal is (c) The Royal Society of Chemistry 2013

MeLi (6.5 mL, 9.4 mmol). The resulting mixture was stirred for 20 min at  $-78\text{ }^{\circ}\text{C}$ . The reaction was quenched with aqueous  $\text{NH}_4\text{Cl}$  at  $-78\text{ }^{\circ}\text{C}$  and extracted with  $\text{Et}_2\text{O}$ . The combined organic layers were dried over anhydrous  $\text{MgSO}_4$ . The volatiles were removed *in vacuo* and the residue was purified by flash column chromatography using 35% EtOAc in hexane to afford **3b** (0.4989 g, 34% yield). **1-(1-(Methylsulfonyl)aziridin-2-yl)ethanone (3b)**: Colourless oil;  $R_f$  0.38 (50% EtOAc in hexane);  $^1\text{H NMR}$  (400 MHz,  $\text{C}_6\text{D}_6$ )  $\delta$  3.05 (dd,  $J = 7.4, 4.2$  Hz, 1H), 2.35 (s, 3H), 2.24 (d,  $J = 7.4$  Hz, 1H), 1.81 (d,  $J = 4.2$  Hz, 1H), 1.62 (s, 3H) ppm;  $^{13}\text{C NMR}$  (100 MHz,  $\text{C}_6\text{D}_6$ )  $\delta$  200.2, 41.1, 38.8, 31.0, 25.6 ppm; IR ( $\text{CH}_2\text{Cl}_2$ ) 3062, 2939, 1720 (C=O), 1411, 1326  $\text{cm}^{-1}$ ; LRMS (EI, 20 eV):  $m/z$  163 ( $\text{M}^+$ , 17), 148 (29), 122 (100), 120 (58), 107 (25), 84 (26); HRMS (EI, 20 eV) Calculated for  $\text{C}_5\text{H}_9\text{N}$  ( $\text{M}^+$ ) 163.0298, Found 163.0303.

### Preparation of 3c

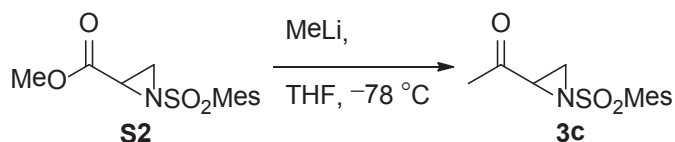

Aziridinyl methyl ester **S2** was prepared according to literature procedure.<sup>2</sup> To a solution of **S2** (1.040 g, 3.673 mmol) in anhydrous THF (40 mL) at  $-78\text{ }^{\circ}\text{C}$  was added 1.45 M MeLi (2.6 mL, 3.7 mmol). The resulting mixture was stirred for 30 min at  $-78\text{ }^{\circ}\text{C}$ . The reaction was quenched with aqueous  $\text{NH}_4\text{Cl}$  at  $-78\text{ }^{\circ}\text{C}$  and extracted with  $\text{Et}_2\text{O}$ . The combined organic layers were dried over anhydrous  $\text{MgSO}_4$ . The volatiles were removed *in vacuo* and the residue was purified by flash column chromatography using 15% EtOAc in hexane to afford **S3** (0.7244 g, 74% yield). **1-(1-(Mesitylsulfonyl)aziridin-2-yl)ethanone (3c)**: White solid; mp: 33-36  $^{\circ}\text{C}$ ;  $R_f = 0.52$  (20% EtOAc in hexane);  $^1\text{H NMR}$  (400 MHz,  $\text{C}_6\text{D}_6$ )  $\delta$  6.61 (s, 2H), 3.14 (dd,  $J = 7.3, 4.1$  Hz, 1H), 2.70 (s, 6H), 2.34 (d,  $J = 7.3$  Hz, 1H), 1.85 (s, 3H), 1.69 (d,  $J = 4.1$  Hz, 1H), 1.48 (s, 3H) ppm;  $^{13}\text{C NMR}$  (100 MHz,  $\text{C}_6\text{D}_6$ )  $\delta$  200.5, 143.6, 140.4, 132.6, 132.1, 41.1, 31.3, 25.4, 23.0, 20.7 ppm; IR ( $\text{CH}_2\text{Cl}_2$ ) 3047, 2977, 2939, 1712 (C=O), 1604, 1450  $\text{cm}^{-1}$ ; LRMS (EI, 20 eV)  $m/z$  267 ( $\text{M}^+$ , 17), 153 (35), 149 (34), 136 (48), 119 (78), 106 (35), 89 (54), 81 (69); HRMS (EI, 20 eV) Calculated for  $\text{C}_{13}\text{H}_{17}\text{NO}_3\text{S}$  ( $\text{M}^+$ ) 267.0924, Found 267.0917.

<sup>2</sup> H. Tamamura, T. Tanaka, H. Tsutsumi, K. Nemoto, S. Mizokami, N. Ohashi, S. Oishi, N. Fujii, *Tetrahedron*, 2007, **63**, 9243.

Supplementary Material (ESI) for Chemical Communications  
This journal is (c) The Royal Society of Chemistry 2013

### Preparation of 3d

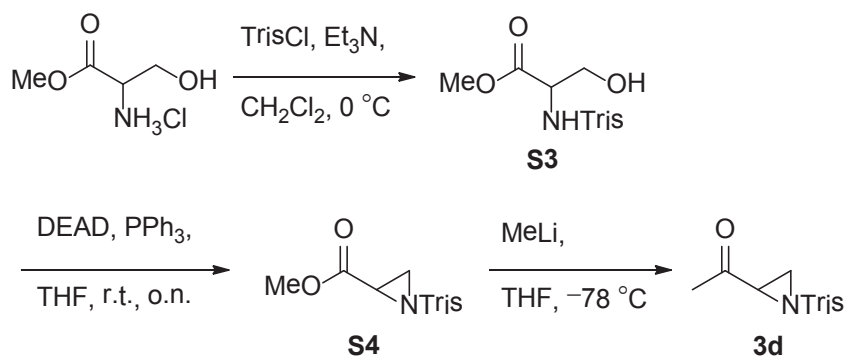

To a solution of DL-Serine methyl ester hydrochloride (1.556 g, 9.999 mmol) in CH<sub>2</sub>Cl<sub>2</sub> (40 mL) at 0 °C was added Et<sub>3</sub>N (3.0 mL, 21 mmol) and 2, 4, 6-triisopropylbenzenesulfonyl chloride (3.514 g, 11.60 mmol). The resulting mixture was stirred overnight at 0 °C. The reaction was quenched with aqueous NaHCO<sub>3</sub> and extracted with Et<sub>2</sub>O. The combined organic layers were dried over anhydrous MgSO<sub>4</sub>. The volatiles were removed *in vacuo* and the residue was purified by flash column chromatography using 35% EtOAc in hexane to afford **S3** (3.5504 g, 92% yield).

**3-Hydroxy-2-(2,4,6-triisopropylphenylsulfonamido) propanoate (S3):** White solid; mp: 117-119 °C;  $R_f = 0.20$  (35% EtOAc in hexane); <sup>1</sup>H NMR (400 MHz, CDCl<sub>3</sub>) δ 7.16 (s, 2H), 5.56 (d,  $J = 7.2$  Hz, 1H), 4.12-4.04 (m, 3H), 3.91 (d,  $J = 3.7$  Hz, 2H), 3.63 (s, 3H), 2.89 (septet,  $J = 6.9$  Hz, 1H), 2.24 (br, s, 1H), 1.28-1.23 (m, 18H) ppm; <sup>13</sup>C NMR (100 MHz, CDCl<sub>3</sub>) δ 170.5, 153.3, 150.4, 132.2, 124.0, 63.7, 57.2, 53.0, 34.2, 30.0, 25.0, 24.8, 23.7, 23.6 ppm; IR (CH<sub>2</sub>Cl<sub>2</sub>) 3340, 2960, 2931, 2869, 1743 (C=O), 1332 cm<sup>-1</sup>; LRMS (EI, 20 eV)  $m/z$  385 (M<sup>+</sup>, 1), 267 (100), 251 (37), 236 (13), 221 (30), 218 (28); HRMS (EI, 20 eV) Calculated for C<sub>19</sub>H<sub>31</sub>NO<sub>5</sub>S (M<sup>+</sup>) 385.1917, Found 385.1925.

To a solution of **S3** (3.411 g, 8.859 mmol) in THF (80 mL) at 0 °C was added PPh<sub>3</sub> (2.947 g, 11.25 mmol) and diethylazodicarboxylate (1.8 mL, 11 mmol). The resulting mixture was stirred overnight from 0 °C to room temperature. The volatiles were removed *in vacuo* and the residue was purified by flash column chromatography using 8% EtOAc in hexane to afford **S4** (2.9513 g, 91% yield). **Methyl 1-((2,4,6-triisopropylphenyl)sulfonyl)aziridine-2-carboxylate (S4):** White solid; mp: 54-56 °C;  $R_f = 0.33$  (10% EtOAc in hexane); <sup>1</sup>H NMR (400 MHz, C<sub>6</sub>D<sub>6</sub>) δ 7.19 (s, 2H), 4.65 (septet,  $J = 6.7$  Hz, 2H), 3.28 (dd,  $J = 7.0, 4.0$  Hz, 1H), 3.10 (s, 3H), 2.62 (septet,  $J = 6.9$  Hz, 1H), 2.50 (d,  $J = 7.0$  Hz, 1H), 2.14 (d,  $J = 4.0$  Hz, 1H), 1.32 (d,  $J = 6.7$  Hz, 6H), 1.29 (d,  $J = 6.7$  Hz, 6H) ppm; <sup>13</sup>C NMR (100 MHz, CDCl<sub>3</sub>) δ 167.1, 154.1, 151.9, 131.8, 124.2, 52.0, 35.8, 34.4, 31.6, 30.2, 25.1, 25.0, 23.5 ppm; IR (CH<sub>2</sub>Cl<sub>2</sub>) 3064, 2956, 2929, 2900, 2869, 1743 (C=O), 1598, 1564 cm<sup>-1</sup>; LRMS (EI, 20eV)  $m/z$  367 (M<sup>+</sup>, 1), 294 (3), 266 (43), 251 (79), 233 (3), 218 (62); HRMS (EI,

Supplementary Material (ESI) for Chemical Communications  
This journal is (c) The Royal Society of Chemistry 2013

20 eV) Calculated for C<sub>19</sub>H<sub>29</sub>NO<sub>4</sub>S (M<sup>+</sup>) 367.1812, Found 367.1808.

To a solution of **S4** (1.512 g, 4.119 mmol) in anhydrous THF (80 mL) at -78 °C was added 1.45 M MeLi (2.9 mL, 4.2 mmol). The resulting mixture was stirred for 20 min at -78 °C. The reaction was quenched with aqueous NH<sub>4</sub>Cl at -78 °C and extracted with Et<sub>2</sub>O. The combined organic layers were dried over anhydrous MgSO<sub>4</sub>. The volatiles were removed *in vacuo* and the residue was purified by flash column chromatography using 8% EtOAc in hexane to afford **3d** (0.12284 g, 85% yield). **1-(1-((2,4,6-Triisopropylphenyl)sulfonyl)aziridin-2-yl)ethanone (3d)**: Colourless oil; R<sub>f</sub> = 0.50 (20% EtOAc in hexane); <sup>1</sup>H NMR (400 MHz, C<sub>6</sub>D<sub>6</sub>) δ 7.20 (s, 2H), 4.59 (septet, *J* = 6.8 Hz, 2H), 3.24 (dd, *J* = 7.3, 4.1 Hz, 1H), 2.64 (septet, *J* = 6.9 Hz, 1H), 2.43 (d, *J* = 7.3 Hz, 1H), 1.83 (d, *J* = 4.1 Hz, 1H), 1.56 (s, 3H), 1.29 (d, *J* = 6.8 Hz, 6H), 1.28 (d, *J* = 6.8 Hz, 6H), 1.08 (d, *J* = 6.9 Hz, 6H) ppm; <sup>13</sup>C NMR (100 MHz, C<sub>6</sub>D<sub>6</sub>) δ 200.1, 154.2, 151.9, 131.7, 124.3, 41.6, 34.4, 31.6, 30.1, 25.3, 25.1, 25.0, 23.6 ppm; IR (CH<sub>2</sub>Cl<sub>2</sub>) 3060, 2964, 2929, 2871, 2893, 1712 (C=O), 1598, 1560 cm<sup>-1</sup>; LRMS (EI, 20 eV) *m/z* 351 (M<sup>+</sup>, 1), 266 (66), 251 (74), 249 (4), 235 (2), 233 (3); HRMS (EI, 20 eV) Calculated for C<sub>19</sub>H<sub>29</sub>NO<sub>3</sub>S (M<sup>+</sup>) 351.1863, Found 351.1859.

### Preparation of 3e

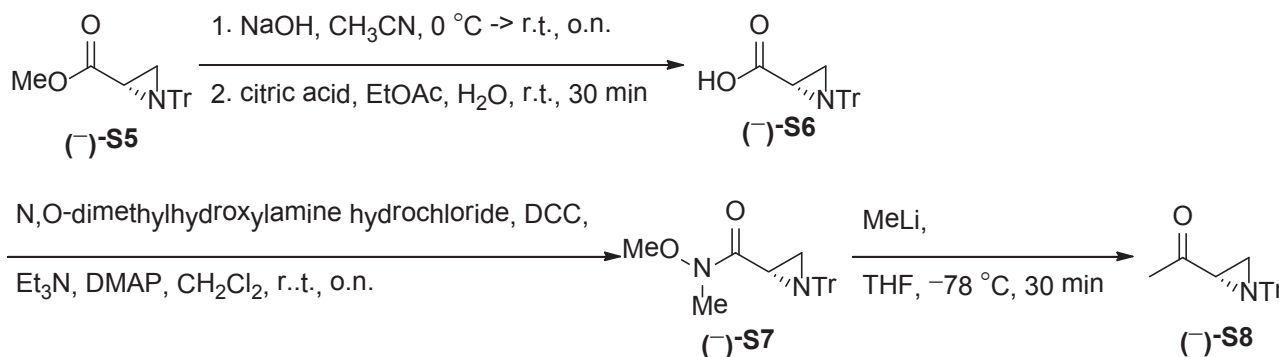

Aziridinyl methyl ester **S5** was prepared according to literature procedure from L-serine.<sup>3</sup>

To a solution of (-)-**S5** (19.02 g, 55.37 mmol) in CH<sub>3</sub>CN (60 mL) was added NaOH (3.452 g, 86.27 mmol) in H<sub>2</sub>O (60 mL) at 0 °C. The reaction mixture was stirred overnight from 0 °C to room temperature. The bulk of the CH<sub>3</sub>CN was removed *in vacuo*. H<sub>2</sub>O (110 mL) and citric acid monohydrate (23.62 g, 112.4 mmol) in EtOAc (400 mL) was added and the resulting mixture was stirred at room temperature for 30 min. The two layers were separated and the aqueous layer was

<sup>3</sup> F. Liu, J. Thomas, T. R. Bureke Jr., *Synthesis*, 2008, **15**, 2432; A. M. King, C. Salomé, J. Dinsmore, E. Salomé-Grosjean, M. De Ryck, R. Kaminski, A. Valade, H. Kohn, *J. Med. Chem.*, 2011, **54**, 4815.

Supplementary Material (ESI) for Chemical Communications  
This journal is (c) The Royal Society of Chemistry 2013

extracted with EtOAc (100 mL x 5). The combined organic layers were dried over anhydrous MgSO<sub>4</sub> and the volatiles were removed *in vacuo*. The crude product of (–)-**S6** was subjected to the subsequent reaction without further purification.

To a solution of (–)-**S6** in CH<sub>2</sub>Cl<sub>2</sub> (300 mL) was added DMAP (0.6810 g, 5.574 mmol), Et<sub>3</sub>N (11.6 mL, 83.5 mmol), N,O-dimethylhydroxylamine hydrochloride (5.593 g, 57.34 mmol) and DCC (11.65 g, 56.44 mmol) at 0 °C. The reaction mixture was stirred at room temperature overnight and quenched with brine. The mixture was extracted with CH<sub>2</sub>Cl<sub>2</sub> (200 mL x 3), separated and dried over anhydrous MgSO<sub>4</sub>. The volatiles were removed *in vacuo*. The residue was purified by flash column chromatography using 25% EtOAc in hexane to afford (–)-**S7** (18.4927 g, 41% yield).

**(S)-N-Methoxy-N-methyl-1-tritylaziridine-2-carboxamide ((–)-S7):** White solid; mp: 58-60 °C; R<sub>f</sub> = 0.30 (20% EtOAc in hexane); [α]<sub>D</sub><sup>20</sup> = –53.3° (c = 1.08, CHCl<sub>3</sub>); <sup>1</sup>H NMR (400 MHz, CDCl<sub>3</sub>) δ 7.54-7.52 (m, 6H), 7.29-7.19 (m, 9H), 3.37 (s, 3H), 3.20 (s, 3H), 2.37-2.33 (m, 2H), 1.41 (dd, J = 5.9, 1.6 Hz, 1H) ppm; <sup>13</sup>C NMR (100 MHz, CDCl<sub>3</sub>) δ 171.3, 144.0, 129.5, 127.7, 127.0, 74.6, 61.5, 32.7, 29.2, 28.1 ppm; IR (CH<sub>2</sub>Cl<sub>2</sub>) 3042, 2980, 1665 (C=O), 1489, 1341, 1244, 1017 cm<sup>-1</sup>; LRMS (EI, 20 eV) m/z 341 (M<sup>+</sup>-CH<sub>3</sub>O, 1), 243 (100), 165 (47); HRMS (EI, 20 eV) Calculated for C<sub>23</sub>H<sub>21</sub>N<sub>2</sub>O (M<sup>+</sup>-CH<sub>3</sub>O) 341.1654, Found 341.1648.

To a solution of (–)-**S7** (8.241 g, 22.13 mmol) in THF (90 mL) was added MeLi (2.39 M in diethoxymethane, 9.8 mL, 23 mmol) slowly at –78 °C. The reaction mixture was stirred for 30 min at –78 °C before quenching with aqueous NH<sub>4</sub>Cl at –78 °C. The mixture was extracted with Et<sub>2</sub>O (100 mL x 3), separated and dried over anhydrous MgSO<sub>4</sub>. The volatiles were removed *in vacuo*. The residue was purified by flash column chromatography using CH<sub>2</sub>Cl<sub>2</sub> to afford (–)-**S8** (7.0657 g, 98% yield). **(S)-1-(1-Tritylaziridin-2-yl)ethanone ((–)-S8):** Colourless oil; R<sub>f</sub> = 0.68 (20% EtOAc in hexane); [α]<sub>D</sub><sup>20</sup> = –69.3° (c = 0.73, CHCl<sub>3</sub>); <sup>1</sup>H NMR (400 MHz, CDCl<sub>3</sub>) δ 7.47-7.40 (m, 6H), 7.30-7.20 (m, 9H), 2.28 (s, 3H), 2.20 (dd, J = 2.7, 1.1 Hz, 1H), 1.98 (dd, J = 6.4, 2.7 Hz, 1H), 1.44 (dd, J = 6.4, 1.0 Hz, 1H) ppm; <sup>13</sup>C NMR (100 MHz, CDCl<sub>3</sub>) δ 207.8, 143.5, 129.3, 127.8, 127.1, 74.6, 39.4, 29.1, 25.2 ppm; IR (CH<sub>2</sub>Cl<sub>2</sub>) 3086, 3067, 2984, 1701 (C=O), 1489, 1447, 1356, 1217, 1003 cm<sup>-1</sup>; LRMS (EI, 20 eV) m/z 327 (M<sup>+</sup>, 1), 243 (100), 165 (46); HRMS (EI, 20 eV) Calculated for C<sub>23</sub>H<sub>21</sub>NO (M<sup>+</sup>) 327.1623, Found 327.1619.



Supplementary Material (ESI) for Chemical Communications  
This journal is (c) The Royal Society of Chemistry 2013

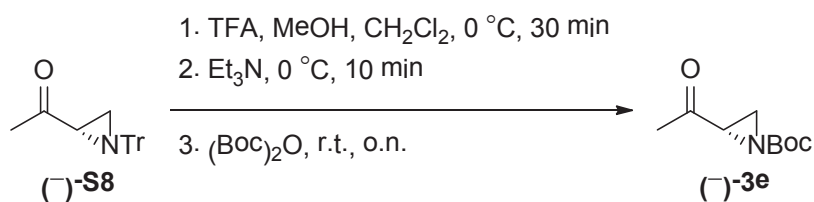

To a solution of (-)-**S8** (2.361 g, 7.212 mmol) in CH<sub>2</sub>Cl<sub>2</sub> (35 mL) was added MeOH (0.300 mL, 7.41 mmol) and TFA (1.1 mL, 14 mmol) at 0 °C. The reaction mixture was stirred at 0 °C for 30 min. Et<sub>3</sub>N (3.0 mL, 22 mmol) was added and the resulting mixture was stirred at 0 °C for 10 min. (Boc)<sub>2</sub>O (1.8 mL, 7.8 mmol) was then added and the mixture was stirred at room temperature overnight before washing with 10% citric acid solution, H<sub>2</sub>O and brine. The organic layer was dried over anhydrous MgSO<sub>4</sub>. The volatiles were removed *in vacuo*. The residue was purified by flash column chromatography using 20% EtOAc in hexane to afford (-)-**3e** (1.1299 g, 85%).

**(S)-tert-Butyl 2-acetylaziridine-1-carboxylate((-)-3e)**: Colourless oil;  $R_f = 0.39$  (20% EtOAc in hexane);  $[\alpha]_D^{20} = -104.2^\circ$  ( $c = 0.54$ , CHCl<sub>3</sub>); <sup>1</sup>H NMR (400 MHz, CDCl<sub>3</sub>)  $\delta$  3.10 (dd,  $J = 6.0, 3.2$  Hz, 1H), 2.45 (dd,  $J = 6.0, 1.2$  Hz, 1H), 2.40 (dd,  $J = 3.2, 1.2$  Hz, 1H), 2.20 (s, 3H), 1.45 (s, 9H) ppm; <sup>13</sup>C NMR (100 MHz, CDCl<sub>3</sub>)  $\delta$  203.7, 160.0, 82.3, 41.1, 31.8, 27.9, 27.0 ppm; IR (CH<sub>2</sub>Cl<sub>2</sub>) 2992, 2982, 1724 (C=O), 1711 (C=O), 1370, 1283 cm<sup>-1</sup>; LRMS (EI, 20 eV)  $m/z$  170 (M<sup>+</sup>-CH<sub>3</sub>, 2), 150 (5), 126 (28), 112 (100), 105 (29), 85 (77), 77 (10); HRMS (EI, 20 eV) Calculated for C<sub>8</sub>H<sub>12</sub>NO<sub>3</sub> (M<sup>+</sup>-CH<sub>3</sub>) 170.0817, Found 170.0810. The enantiomeric excess was determined by HPLC analysis [Daicel chiralpak AD-3, 0.5 mL/min,  $\lambda = 210$  nm, 6% IPA in hexane,  $t_R$ (major) = 15.03 min,  $t_R$ (minor) = 12.27 min] to be 99% ee.

The racemic aziridinyl ketone **3e** could be obtained in one step from methyl vinyl ketone as described below:

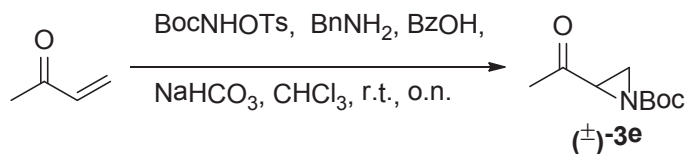

The solution of BnNH<sub>2</sub> (8.0 mL, 73 mmol) and BzOH (3.775 g, 30.92 mmol) in CHCl<sub>3</sub> (250 mL) was stirred at room temperature for 10 min. Methyl vinyl ketone (10.9 mL, 134 mmol) was added and the resulting mixture was stirred for 10 min. BocNHOTs<sup>4</sup> (21.36 g, 76.33 mmol) was added and the mixture was stirred for 5 min. NaHCO<sub>3</sub> (10.47 g, 124.6 mmol) was added and the reaction

<sup>4</sup> J. P. Lajiness, W. M. Robertson, I. Dunwiddie, M. A. Broward, G. A. Vielhauer, S. J. Weir, D. L. Boger, *J. Med. Chem.*, 2010, **53**, 7731.

Supplementary Material (ESI) for Chemical Communications  
This journal is (c) The Royal Society of Chemistry 2013

mixture was stirred at room temperature overnight. The mixture was filter through a short pad of silica gel and washed with  $\text{CH}_2\text{Cl}_2$ . The volatiles were removed *in vacuo*. The residue was purified by flash column chromatography using 20% EtOAc in hexane to afford ( $\pm$ )-**3e** (12.9158 g, 94% yield).

### Preparation of **3f**

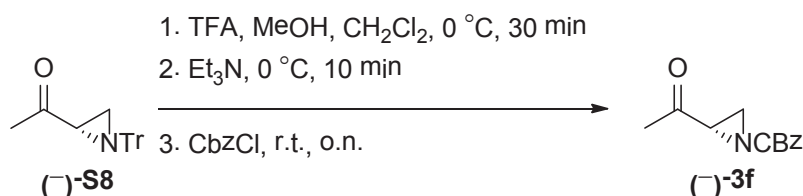

To a solution of ( $-$ )-**S8** (0.1014 g, 0.3097 mmol) in  $\text{CH}_2\text{Cl}_2$  (1.6 mL) was added MeOH (0.015 mL, 0.37 mmol) and TFA (0.050 mL, 0.65 mmol) at 0 °C. The reaction mixture was stirred at 0 °C for 30 min.  $\text{Et}_3\text{N}$  (0.130 mL, 0.935 mmol) was added and the resulting mixture was stirred at 0 °C for 10 min. CBzCl (0.050 mL, 0.35 mmol) was then added and the mixture was stirred at room temperature overnight before washing with 10% citric acid solution,  $\text{H}_2\text{O}$  and brine. The organic layer was dried over anhydrous  $\text{MgSO}_4$ . The volatiles were removed *in vacuo*. The residue was purified by flash column chromatography using 25% EtOAc in hexane to afford ( $-$ )-**3f** (0.0372 g, 55%). (**S**)-Benzyl 2-acetylaziridine-1-carboxylate (( $-$ )-**3f**): Colourless oil;  $R_f = 0.42$  (35% EtOAc in hexane);  $[\alpha]_D^{20} = -71.1^\circ$  ( $c = 0.59$ ,  $\text{CHCl}_3$ );  $^1\text{H}$  NMR (400 MHz,  $\text{CDCl}_3$ )  $\delta$  7.37-7.33 (m, 5H), 5.17 (d,  $J = 12.1$  Hz, 1H), 5.11 (d,  $J = 12.1$  Hz, 1H), 3.19 (dd,  $J = 6.0, 3.3$  Hz, 1H), 2.52 (dd,  $J = 6.0, 1.2$  Hz, 1H), 2.46 (dd,  $J = 3.3, 1.2$  Hz, 1H), 2.20 (s, 3H) ppm;  $^{13}\text{C}$  NMR (100 MHz,  $\text{CDCl}_3$ )  $\delta$  203.2, 161.1, 135.4, 128.7, 128.6, 128.5, 68.8, 41.0, 32.0, 27.1 ppm. The spectral characteristics corresponded to those of ( $\pm$ )-**3f** in the literature.<sup>5</sup> The enantiomeric excess was determined by HPLC analysis [Daicel chiralcel OD-3, 0.5 mL/min,  $\lambda = 210$  nm, 20% IPA in hexane,  $t_R$ (major) = 23.76 min,  $t_R$ (minor) = 20.13 min] to be 99% ee.

The racemic aziridinyl ketone **3f** could be obtained in one step from methyl vinyl ketone as described below.

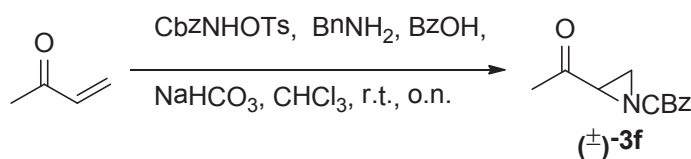

The solution of  $\text{BnNH}_2$  (2.750 mL, 25.18 mmol) and BzOH (1.288 g, 10.55 mmol) in  $\text{CHCl}_3$  (84 mL)

<sup>5</sup> S. Minakata, Y. Murakami, R. Tsuruoka, S. Kitanaka, *Chem. Commun.*, 2008, 6363.

Supplementary Material (ESI) for Chemical Communications  
This journal is (c) The Royal Society of Chemistry 2013

was stirred at room temperature for 10 min. Methyl vinyl ketone (1.7 mL, 21 mmol) was added and the resulting mixture was stirred for 10 min. CBzNHOTs<sup>6</sup> (8.099 g, 25.20 mmol) was added and the mixture was stirred for 5 min. NaHCO<sub>3</sub> (3.527 g, 41.98 mmol) was added and the reaction mixture was stirred at room temperature overnight. The mixture was filter through a short pad of silica gel and washed with CH<sub>2</sub>Cl<sub>2</sub>. The volatiles were removed *in vacuo*. The residue was purified by flash column chromatography using 20% EtOAc in hexane to afford (±)-**3f** (1.7522 g, 38% yield).

### Preparation of **3g**

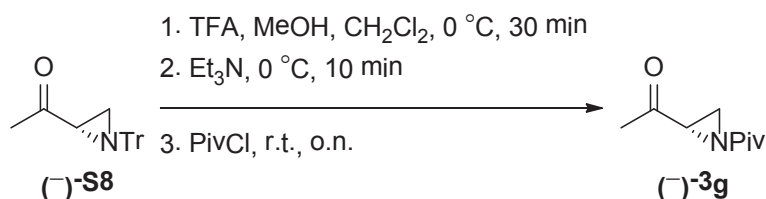

To a solution of (-)-**S8** (2.344 g, 7.158 mmol) in CH<sub>2</sub>Cl<sub>2</sub> (35.8 mL) was added MeOH (0.290 mL, 7.16 mmol) and TFA (1.1 mL, 14 mmol) at 0 °C. The reaction mixture was stirred at 0 °C for 30 min. Et<sub>3</sub>N (3.0 mL, 22 mmol) was added and the resulting mixture was stirred at 0 °C for 10 min. PivCl (1.0 mL, 8.1 mmol) was then added and the mixture was stirred at room temperature overnight before washing with 10% citric acid solution, H<sub>2</sub>O and brine. The organic layer was dried over anhydrous MgSO<sub>4</sub>. The volatiles were removed *in vacuo*. The residue was purified by flash column chromatography using 25% EtOAc in hexane to afford (-)-**3g** (1.0018 g, 83%).

**(S)-1-(2-Acetylaziridin-1-yl)-2,2-dimethylpropan-1-one ((-)-3g)**: Colourless oil;  $R_f = 0.36$  (20% EtOAc in hexane);  $[\alpha]_D^{20} = -169.9^\circ$  ( $c = 0.44$ , CHCl<sub>3</sub>); <sup>1</sup>H NMR (400 MHz, CDCl<sub>3</sub>)  $\delta$  3.09 (dd,  $J = 6.3, 3.1$  Hz, 1H), 2.58 (dd,  $J = 6.3, 1.2$  Hz, 1H), 2.43 (dd,  $J = 3.1, 1.2$  Hz, 1H), 2.15 (s, 3H), 1.22 (s, 9H) ppm; <sup>13</sup>C NMR (100 MHz, CDCl<sub>3</sub>)  $\delta$  204.0, 189.7, 41.3, 41.2, 30.6, 27.7, 25.6 ppm; IR (CH<sub>2</sub>Cl<sub>2</sub>) 2972, 2938, 1711 (C=O), 1694 (C=O), 1479, 1396, 1277, 1198 cm<sup>-1</sup>; LRMS (EI, 20 eV)  $m/z$  169 (M<sup>+</sup>, 2), 154 (4), 126 (43), 112 (10), 85 (100); HRMS (EI, 20 eV) Calculated for C<sub>9</sub>H<sub>15</sub>NO<sub>2</sub> (M<sup>+</sup>) 169.1103, Found 169.1095. The enantiomeric excess was determined by HPLC analysis [Daicel chiralpak AY-3, 0.5 mL/min,  $\lambda = 210$  nm, 10% IPA in hexane,  $t_R$ (major) = 22.42 min,  $t_R$ (minor) = 16.21 min] to be 99% ee.

<sup>6</sup> L. Qin, Z. Zhou, J. Wei, T. Yan, H. Wen, *Synth. Commun.*, 2010, **40**, 642.

Supplementary Material (ESI) for Chemical Communications  
This journal is (c) The Royal Society of Chemistry 2013

### Preparation of 3h

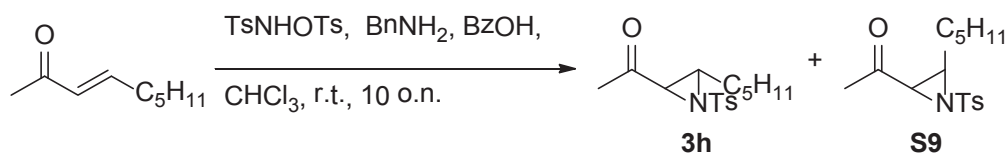

The solution of BnNH<sub>2</sub> (0.105 mL, 0.961 mmol) and BzOH (0.0503 g, 0.412 mmol) in CHCl<sub>3</sub> (3.2 mL) was stirred at room temperature for 10 min. Trans-3-nonen-2-one (0.135 mL, 0.816 mmol) was added and the resulting mixture was stirred for 10 min. TsNHOTs<sup>7</sup> (0.3301 g, 0.9669 mmol) was added and the reaction mixture was stirred at room temperature overnight. The mixture was filter through a short pad of silica gel and washed with CH<sub>2</sub>Cl<sub>2</sub>. The volatiles were removed *in vacuo*. The residue was purified by flash column chromatography using 20% EtOAc in hexane to afford **3i** and **S9** (0.1443 g, 57% yield, 17.9:1). Analytically pure **3h** and **S9** were obtained by further careful column chromatography using 80% CH<sub>2</sub>Cl<sub>2</sub> in hexane.

**1-((2S\*,3R\*)-3-Pentyl-1-tosylaziridin-2-yl)ethanone (3h):** Colourless oil; R<sub>f</sub> = 0.64 (80% CH<sub>2</sub>Cl<sub>2</sub> in hexane); <sup>1</sup>H NMR (400 MHz, CDCl<sub>3</sub>) δ 7.81 (d, *J* = 8.3 Hz, 2H), 7.31 (d, *J* = 8.1 Hz, 2H), 3.28 (d, *J* = 4.0 Hz, 1H), 2.91 (qd, *J* = 5.3, 4.1 Hz, 1H), 2.43 (s, 3H), 2.22-2.14 (m, 1H), 1.98-1.93 (m, 1H), 1.92 (s, 3H), 1.59-1.41 (m, 2H), 1.38-1.27 (m, 4H), 0.87 (t, *J* = 6.8 Hz, 3H) ppm; <sup>13</sup>C NMR (100 MHz, CDCl<sub>3</sub>) δ 202.5, 144.7, 136.9, 129.9, 127.6, 50.3, 49.8, 31.3, 28.1, 27.6, 26.0, 22.5, 21.7, 14.0 ppm; IR (CH<sub>2</sub>Cl<sub>2</sub>) 3053, 2961, 2930, 2861, 1713 (C=O), 1599, 1458, 1444, 1406, 1331, 1163 cm<sup>-1</sup>; LRMS (EI, 20 eV) *m/z* 366 (M<sup>+</sup>-C<sub>2</sub>H<sub>3</sub>O, 2), 210 (3), 154 (100), 91 (43), 84 (36); HRMS (EI, 20 eV) Calculated for C<sub>14</sub>H<sub>20</sub>NO<sub>2</sub>S (M<sup>+</sup>-C<sub>2</sub>H<sub>3</sub>O) 266.1215, Found 266.1210.

**1-((2S\*,3S\*)-3-Pentyl-1-tosylaziridin-2-yl)ethanone (S9):** Colourless oil; R<sub>f</sub> = 0.48 (80% CH<sub>2</sub>Cl<sub>2</sub> in hexane); <sup>1</sup>H NMR (400 MHz, CDCl<sub>3</sub>) δ 7.82 (d, *J* = 8.2 Hz, 2H), 7.33 (d, *J* = 8.2 Hz, 2H), 3.39 (d, *J* = 7.7 Hz, 1H), 2.92 (dq, *J* = 7.9, 5.1 Hz, 1H), 2.43 (s, 3H), 1.91 (s, 3H), 1.49-1.42 (m, 1H), 1.34-1.25 (m, 1H), 1.22-1.12 (m, 6H), 0.78 (t, *J* = 6.2 Hz, 3H) ppm; <sup>13</sup>C NMR (100 MHz, CDCl<sub>3</sub>) δ 201.3, 145.2, 134.3, 129.9, 128.3, 47.3, 45.9, 31.1, 29.4, 27.3, 26.7, 22.4, 21.7, 13.8 ppm; IR (CH<sub>2</sub>Cl<sub>2</sub>) 3048, 2959, 2930, 2861, 1726 (C=O), 1599, 1410, 1331, 1163 cm<sup>-1</sup>; LRMS (EI, 20 eV) *m/z* 309 (M<sup>+</sup>, 1), 266 (11), 210 (11), 154 (100), 91 (44), 84 (51); HRMS (EI, 20 eV) Calculated for C<sub>16</sub>H<sub>23</sub>NO<sub>3</sub>S (M<sup>+</sup>) 309.1399, Found 309.1393.

<sup>7</sup> Ł. Albrecht, H. Jiang, G. Dickmeiss, B. Gschwend, S. G. Hansen, K. A. Jørgensen, *J. Am. Chem. Soc.*, 2010, **132**, 9188.

Supplementary Material (ESI) for Chemical Communications  
This journal is (c) The Royal Society of Chemistry 2013

### Preparation of **3i**

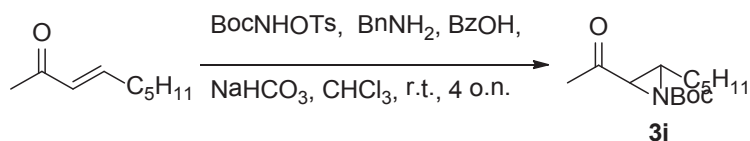

The solution of BnNH<sub>2</sub> (2.380 mL, 21.79 mmol) and BzOH (1.116 g, 9.139 mmol) in CHCl<sub>3</sub> (73 mL) was stirred at room temperature for 10 min. Trans-3-nonen-2-one (3.0 mL, 18 mmol) was added and the resulting mixture was stirred for 10 min. BocNHOTs<sup>4</sup> (6.272 g, 21.81 mmol) was added and the mixture was stirred for 5 min. NaHCO<sub>3</sub> (10.47 g, 124.6 mmol) was added and the reaction mixture was stirred at room temperature overnight. The mixture was filter through a short pad of silica gel and washed with CH<sub>2</sub>Cl<sub>2</sub>. The volatiles were removed *in vacuo*. The residue was purified by flash column chromatography using 10% EtOAc in hexane to afford **3i** (3.8041 g, 82% yield). **(2S\*,3R\*)-tert-Butyl 2-acetyl-3-pentylaziridine-1-carboxylate (3i)**: Colourless oil; R<sub>f</sub> = 0.56 (20% EtOAc in hexane); <sup>1</sup>H NMR (500 MHz, CDCl<sub>3</sub>) δ 2.96 (d, *J* = 2.7 Hz, 1H), 2.65-2.62 (m, 1H), 2.25 (s, 3H), 1.59-1.55 (m, 1H), 1.44 (m, 12H), 1.39-1.24 (m, 4H), 0.88 (t, *J* = 6.8 Hz, 3H) ppm; <sup>13</sup>C NMR (125 MHz, CDCl<sub>3</sub>) δ 202.8, 159.2, 81.7, 46.7, 45.6, 31.4, 31.3, 29.1, 28.0, 26.6, 22.6, 14.0 ppm. The spectral characteristics corresponded to those of **3i** in the literature.<sup>8</sup>

### Preparation of **3j**

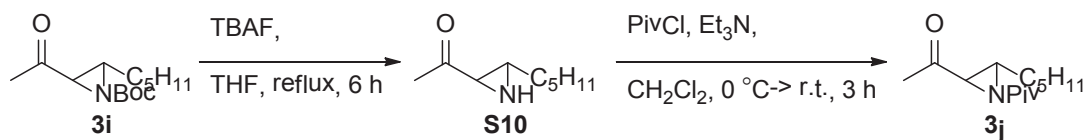

To a solution of **3i** (1.153 g, 4.515 mmol) in THF (22.6 mL) was added TBAF (1.0 M in THF, 5.0 mL, 5.0 mmol). The reaction mixture was heated under reflux for 6 h and then cooled to room temperature. The reaction was quenched with aqueous NaHCO<sub>3</sub>, extracted with EtOAc (50 mL x 3), separated and dried over anhydrous MgSO<sub>4</sub>. The volatiles were removed *in vacuo*. The residue was purified by flash column chromatography using 30% EtOAc in hexane to afford **S10** (0.4324 g, 63% yield). **1-((2S\*,3R\*)-3-Pentylaziridin-2-yl)ethanone (S10)**: Colourless oil; R<sub>f</sub> = 0.38 (35% EtOAc in hexane); <sup>1</sup>H NMR (500 MHz, 333 K, CDCl<sub>3</sub>) δ 2.51 (d, *J* = 2.3 Hz, 1H), 2.28 (s, 3H), 2.01 (td, *J* = 5.5, 2.3 Hz, 1H), 1.65 (br s, 1H), 1.50-1.39 (m, 4H), 1.34-1.31 (m, 4H), 0.90 (t, *J* = 6.9 Hz, 3H) ppm; <sup>13</sup>C NMR (125 MHz, CDCl<sub>3</sub>) δ 205.6, 42.9, 42.3, 33.2, 31.5, 28.8, 26.8, 22.5, 13.8 ppm; IR (CH<sub>2</sub>Cl<sub>2</sub>) 3323 (NH), 3065, 3036, 2959, 2932, 2859, 1701 (C=O), 1458, 1425, 1377, 1231,

<sup>8</sup> F. Pesciaioli, F. De Vincentiis, P. Galzerano, G. Bencivenni, G. Bartoli, A. Mazzanti, P. Melchiorre, *Angew. Chem. Int. Ed.*, 2008, **47**, 8703.

Supplementary Material (ESI) for Chemical Communications  
This journal is (c) The Royal Society of Chemistry 2013

1173  $\text{cm}^{-1}$ ; LRMS (EI, 20 eV)  $m/z$  155 ( $M^+$ , 1), 112 (7), 84 (100); HRMS (EI, 20 eV) Calculated for  $C_9H_{17}NO$  ( $M^+$ ) 155.1310, Found 155.1296.

To a solution of **S10** (0.0558 g, 0.364 mmol) in  $\text{CH}_2\text{Cl}_2$  (1.8 mL) was added  $\text{Et}_3\text{N}$  (0.100 mL, 0.719 mmol) and  $\text{PivCl}$  (0.065 mL, 0.53 mmol) at 0 °C. The reaction mixture was stirred at 0 °C and warmed to room temperature gradually. After 3 h, the reaction was quenched with brine, extracted with  $\text{EtOAc}$  (10 mL x 3), separated and dried over anhydrous  $\text{MgSO}_4$ . The volatiles were removed *in vacuo*. The residue was purified by flash column chromatography using 10%  $\text{EtOAc}$  in hexane to afford **3j** (0.0644 g, 74% yield). **1-((2*S*\*,3*R*\*)-2-Acetyl-3-pentylaziridin-1-yl)-2,2-dimethylpropan-1-one (3j)**: Colourless oil;  $R_f = 0.50$  (20%  $\text{EtOAc}$  in hexane);  $^1\text{H}$  NMR (400 MHz,  $\text{CDCl}_3$ )  $\delta$  3.12 (d,  $J = 2.4$  Hz, 1H), 2.82 (dddd,  $J = 7.3, 4.8, 2.4$  Hz, 1H), 2.28 (s, 3H), 1.92-1.84 (m, 1H), 1.46-1.37 (m, 3H), 1.33-1.28 (m, 4H), 1.21 (s, 9H), 0.88 (t,  $J = 6.7$  Hz, 3H) ppm;  $^{13}\text{C}$  NMR (100 MHz,  $\text{CDCl}_3$ )  $\delta$  203.0, 187.5, 46.9, 45.9, 41.1, 31.5, 31.4, 29.0, 27.6, 26.3, 22.6, 14.1 ppm; IR ( $\text{CH}_2\text{Cl}_2$ ) 2990, 2963, 2934, 1717 (C=O), 1674 (C=O), 1425, 1311, 1117, 1080  $\text{cm}^{-1}$ ; LRMS (EI, 20 eV)  $m/z$  239 ( $M^+$ , 1), 224 (1), 210 (1), 196 (12), 168 (6), 154 (26), 140 (10), 102 (15), 84 (100); HRMS (EI, 20 eV) Calculated for  $C_{14}H_{25}NO_2$  ( $M^+$ ) 239.1885, Found 239.1878.

### Preparation of 3k

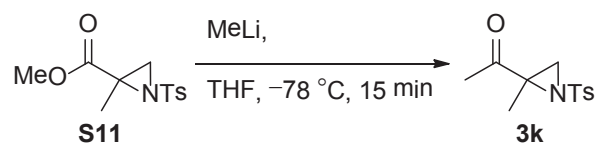

Aziridinyl methyl ester **S11** was prepared according to the literature procedure.<sup>9</sup> To a solution of **S11** (1.550 g, 5.754 mmol) in anhydrous  $\text{THF}$  (30 mL) was added  $\text{MeLi}$  (1.96 M in diethoxymethane, 3.0 mL, 5.9 mmol) slowly at  $-78$  °C and the mixture was stirred at  $-78$  °C for 15 min. The reaction was quenched with aqueous  $\text{NH}_4\text{Cl}$  at  $-78$  °C, extracted with  $\text{Et}_2\text{O}$  (100 mL x 3), separated and dried over anhydrous  $\text{MgSO}_4$ . The volatiles were removed *in vacuo*. The residue was purified by flash column chromatography using 20%  $\text{EtOAc}$  in hexane to afford **3k** (0.8376 g, 57% yield). **1-(2-Methyl-1-tosylaziridin-2-yl)ethanone (3k)**: White solid; mp: 107-110 °C;  $R_f = 0.57$  (30%  $\text{EtOAc}$  in hexane);  $^1\text{H}$  NMR (400 MHz,  $\text{CDCl}_3$ )  $\delta$  7.82 (d,  $J = 8.2$  Hz, 2H), 7.33 (d,  $J = 8.1$  Hz, 2H), 2.81 (s, 1H), 2.53 (s, 1H), 2.44 (s, 3H), 2.07 (s, 3H), 1.83 (s, 3H) ppm;  $^{13}\text{C}$  NMR (100 MHz,  $\text{CDCl}_3$ )  $\delta$  203.9, 144.8, 136.9, 129.8, 127.7, 52.3, 38.4, 24.2, 21.7, 13.5 ppm; IR ( $\text{CH}_2\text{Cl}_2$ ) 3071, 2986, 2947, 1715 (C=O), 1599, 1495, 1456, 1329, 1256, 1165  $\text{cm}^{-1}$ ; LRMS (EI, 20 eV)  $m/z$  253 ( $M^+$ , 1), 210 (20),

<sup>9</sup> B. G. M. Burgaud, D. C. Horwell, A. Padova, M. C. Pritchard, *Tetrahedron*, 1996, **52**, 13035.

Supplementary Material (ESI) for Chemical Communications  
This journal is (c) The Royal Society of Chemistry 2013

155 (75), 98 (90), 91 (100); HRMS (EI, 20 eV) Calculated for C<sub>12</sub>H<sub>15</sub>NO<sub>3</sub>S (M<sup>+</sup>) 253.0773, Found 253.0765.

### Preparation of **3l**

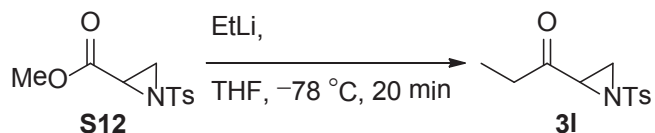

Aziridiny methyl ester **S12** was prepared according to the literature procedure.<sup>1</sup> To a solution of **S12** (1.102 g, 4.316 mmol) in anhydrous THF (17 mL) was added EtLi (0.84 M in dibutylether, 5.4 mL, 4.5 mmol) slowly at -78 °C and the reaction mixture was stirred at -78 °C for 20 min. The reaction was quenched with aqueous NH<sub>4</sub>Cl at -78 °C, extracted with Et<sub>2</sub>O (30 mL x 3), separated and dried over anhydrous MgSO<sub>4</sub>. The volatiles were removed *in vacuo*. The residue was purified by flash column chromatography using CH<sub>2</sub>Cl<sub>2</sub> to afford **3l** (0.4252 g, 39% yield). **1-(1-Tosylaziridin-2-yl)propan-1-one (**3l**):** White solid; R<sub>f</sub> = 0.45 (30% EtOAc in hexane); <sup>1</sup>H NMR (400 MHz, CDCl<sub>3</sub>) δ 7.81 (d, *J* = 8.2 Hz, 2H), 7.34 (d, *J* = 8.0 Hz, 2H), 3.31 (dd, *J* = 7.3, 4.2 Hz, 1H), 2.74 (d, *J* = 7.3 Hz, 1H), 2.47 (d, *J* = 4.2 Hz, 1H), 2.45 (s, 3H), 2.43-2.35 (m, 2H), 0.97 (t, *J* = 7.2 Hz, 3H) ppm; <sup>13</sup>C NMR (100 MHz, CDCl<sub>3</sub>) δ 204.0, 145.4, 134.1, 130.0, 128.3, 41.2, 32.7, 32.2, 21.8, 7.2 ppm. The spectral characteristics corresponded to those of **3l** in the literature.<sup>10</sup>

### Preparation of **3m**

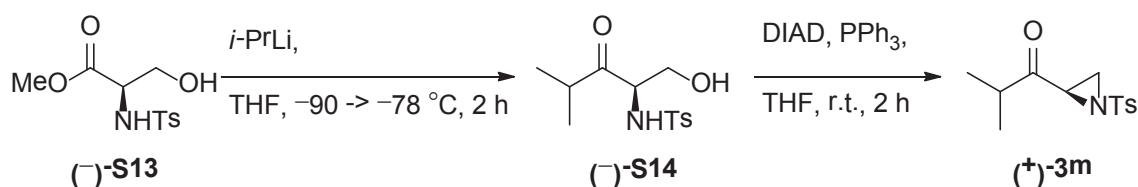

**S13** was prepared according to the literature procedure.<sup>1</sup> To a solution of **S13** (8.830 g, 32.34 mmol) in anhydrous THF (300 mL) at -90 °C was added 0.55 M *i*-PrLi (181 mL, 100 mmol). The resulting mixture was stirred for 2 h from -90 °C to -78 °C. The reaction was quenched with aqueous NH<sub>4</sub>Cl at -78 °C, neutralized to pH 7 by addition of 3 M HCl and extracted with EtOAc. The combined organic layers were dried over anhydrous MgSO<sub>4</sub>. The volatiles were removed *in vacuo* and the residue was purified by flash column chromatography using 30% EtOAc in hexane to afford **(-)-14** (4.3291 g, 47% yield). **(R)-N-(1-Hydroxy-4-methyl-3-oxopentan-2-yl)-4-methylbenzene sulfonamide ((-)-14):** White solid; mp: 132-135 °C; R<sub>f</sub> = 0.48 (50% EtOAc in

<sup>10</sup> D. Chen, C. Timmons, L. Guo, X. Xu, G. Li, *Synthesis*, 2004, 2479.

Supplementary Material (ESI) for Chemical Communications  
This journal is (c) The Royal Society of Chemistry 2013

hexane);  $[\alpha]_D^{20} = -89.6^\circ$  ( $c = 1.35$ ,  $\text{CHCl}_3$ );  $^1\text{H NMR}$  (400 MHz,  $\text{CDCl}_3$ )  $\delta$  7.61 (d,  $J = 8.3$  Hz, 2H), 7.18 (d,  $J = 8.4$  Hz, 2H), 5.92 (d,  $J = 7.0$ , 1H), 3.99-3.95 (m, 1H), 3.80-3.71 (m, 2H), 2.68 (septet,  $J = 6.9$  Hz, 1H), 2.61 (t,  $J = 6.7$  Hz, 1H), 2.29 (s, 3H), 0.89 (d,  $J = 6.7$ , 3H), 0.68 (d,  $J = 7.0$  Hz, 3H) ppm;  $^{13}\text{C NMR}$  (100 MHz,  $\text{CDCl}_3$ )  $\delta$  209.9, 144.0, 136.3, 129.8, 127.3, 63.2, 61.8, 37.3, 21.5, 18.7, 17.3 ppm; IR ( $\text{CH}_2\text{Cl}_2$ ) 3581, 3296, 3062, 2976, 2931, 1718 (C=O), 1598  $\text{cm}^{-1}$ ; LRMS (EI, 20 eV)  $m/z$  214 ( $\text{M}^+ - \text{C}_4\text{H}_7\text{O}$ , 24), 184 (13), 155 (54), 91 (100), 71 (24); HRMS (EI) Calculated for  $\text{C}_9\text{H}_{12}\text{NO}_3\text{S}$  ( $\text{M}^+ - \text{C}_4\text{H}_7\text{O}$ ) 214.0532, Found 214.0530.

To a solution of (–)-**14** (4.329 g, 15.19 mmol) in THF (1.9 L) at 0 °C was added  $\text{PPh}_3$  (7.863 g, 30.01 mmol) and diisopropylazodicarboxylate (5.9 mL, 30 mmol). The resulting mixture was stirred for 2 h at room temperature. The volatiles were removed *in vacuo* and the residue was purified by flash column chromatography using 12% EtOAc in hexane to afford (+)-**3m** (2.1516 g, 53% yield). **(R)-2-Methyl-1-(1-tosylaziridin-2-yl)propan-1-one ((+)-3m)**: Colourless oil;  $R_f = 0.24$  (10% EtOAc in hexane);  $[\alpha]_D^{20} = +66.9^\circ$  ( $c = 1.86$ ,  $\text{CHCl}_3$ );  $^1\text{H NMR}$  (400 MHz,  $\text{C}_6\text{D}_6$ )  $\delta$  7.78 (d,  $J = 8.3$  Hz, 2H), 6.73 (d,  $J = 8.1$  Hz, 2H), 3.32 (dd,  $J = 7.1$ , 4.2 Hz, 1H), 2.40 (d,  $J = 7.1$  Hz, 1H), 2.26 (septet,  $J = 6.9$  Hz, 1H), 2.07 (d,  $J = 4.2$  Hz, 1H), 1.84 (s, 3H), 0.84 (d,  $J = 6.9$ , 3H), 0.80 (d,  $J = 6.9$  Hz, 3H) ppm;  $^{13}\text{C NMR}$  (100 MHz,  $\text{C}_6\text{D}_6$ )  $\delta$  205.2, 144.7, 135.4, 129.8, 128.4, 39.3, 38.7, 32.0, 21.1, 17.7, 17.4 ppm; IR ( $\text{CH}_2\text{Cl}_2$ ) 3056, 2978, 2936, 2877, 1717 (C=O), 1598, 1494  $\text{cm}^{-1}$ ; LRMS (EI, 20 eV)  $m/z$  267 ( $\text{M}^+$ , 3), 224 (4), 212 (6), 155 (72), 136 (8), 112 (52), 91 (100); HRMS (EI, 20 eV) Calculated for  $\text{C}_{13}\text{H}_{17}\text{NO}_3\text{S}$  ( $\text{M}^+$ ) 267.0924, Found 267.0916. The enantiomeric excess was determined by HPLC analysis [Daicel chiralcel OF, 1.0 mL/min,  $\lambda = 254$  nm, 30% IPA in hexane,  $t_R(\text{major}) = 21.16$  min,  $t_R(\text{minor}) = 28.58$  min] to be 92% ee.

## Preparation of Azridinyl Enolsilanes 1a-m

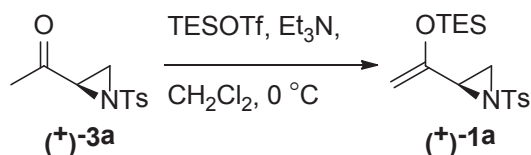

To a solution of (+)-**3a** (0.9596 g, 4.010 mmol) in  $\text{CH}_2\text{Cl}_2$  (40 mL) at  $-78$  °C was added  $\text{Et}_3\text{N}$  (1.7 mL, 12 mmol) and TESOTf (1.85 mL, 8.12 mmol). The resulting mixture was stirred at 0 °C for 3 h. The reaction was quenched with aqueous  $\text{NaHCO}_3$ , extracted with  $\text{Et}_2\text{O}$  (100 mL x 3), separated



Supplementary Material (ESI) for Chemical Communications  
This journal is (c) The Royal Society of Chemistry 2013

and dried over anhydrous  $\text{MgSO}_4$ . The volatiles were removed *in vacuo* and the residue was purified by flash column chromatography using 5% EtOAc and 1%  $\text{Et}_3\text{N}$  in hexane to afford **(+)-1a** (1.2760 g, 90% yield). **(R)-1-Tosyl-2-(1-(triethylsilyloxy)vinyl)aziridine ((+)-1a)**: Colourless oil;  $R_f = 0.45$  (10% EtOAc in hexane);  $[\alpha]_D^{20} = +42.8^\circ$  ( $c = 1.12$ ,  $\text{CHCl}_3$ );  $^1\text{H NMR}$  (400 MHz,  $\text{C}_6\text{D}_6$ )  $\delta$  7.84 (d,  $J = 8.2$  Hz, 2H), 6.77 (d,  $J = 8.1$  Hz, 2H), 4.27 (d,  $J = 1.4$  Hz, 1H), 4.17 (d,  $J = 1.4$  Hz, 1H), 3.26 (dd,  $J = 7.0, 4.4$  Hz, 1H), 2.50 (d,  $J = 7.0$  Hz, 1H), 2.17 (d,  $J = 4.4$  Hz, 1H), 1.86 (s, 3H), 0.85 (t,  $J = 7.9$  Hz, 9H), 0.51 (q,  $J = 7.9$  Hz, 6H) ppm;  $^{13}\text{C NMR}$  (100 MHz,  $\text{C}_6\text{D}_6$ )  $\delta$  152.4, 144.1, 136.5, 129.7, 128.2, 94.6, 41.2, 31.3, 21.1, 6.7, 5.0 ppm; IR ( $\text{CH}_2\text{Cl}_2$ ) 3067, 2960, 2914, 2878, 1636 (C=C), 1598  $\text{cm}^{-1}$ ; LRMS (EI, 20eV)  $m/z$  353 ( $\text{M}^+$ , 1), 324 (100), 296 (25), 198 (5), 177 (6), 155 (12), 115 (15); HRMS (EI, 20 eV) Calculated for  $\text{C}_{17}\text{H}_{27}\text{NO}_3\text{SSi}$  ( $\text{M}^+$ ) 353.1480, Found 353.1480.

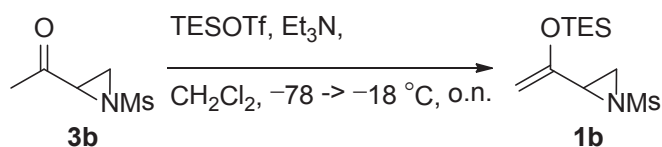

To a solution of **3b** (0.4873 g, 2.990 mmol) in  $\text{CH}_2\text{Cl}_2$  (20 mL) at  $-78^\circ\text{C}$  was added  $\text{Et}_3\text{N}$  (1.3 mL, 9.2 mmol) and TESOTf (1.4 mL, 6.2 mmol). The resulting mixture was stirred overnight from  $-78^\circ\text{C}$  to  $-18^\circ\text{C}$ . The reaction was quenched with aqueous  $\text{NaHCO}_3$  and extracted with  $\text{Et}_2\text{O}$ . The combined organic layers were dried over anhydrous  $\text{MgSO}_4$ . The volatiles were removed *in vacuo* and the residue was purified by flash column chromatography using 8% EtOAc and 0.1%  $\text{Et}_3\text{N}$  in hexane to afford **1b** (0.6523 g, 79% yield). **1-(Methylsulfonyl)-2-(1-(triethylsilyloxy)vinyl)aziridine (1b)**: Colourless oil;  $R_f = 0.34$  (10% EtOAc in hexane);  $^1\text{H NMR}$  (400 MHz,  $\text{C}_6\text{D}_6$ )  $\delta$  4.26 (d,  $J = 1.6$  Hz, 1H), 4.21 (d,  $J = 1.6$  Hz, 1H), 3.08 (dd,  $J = 7.1, 4.4$  Hz, 1H), 2.38 (s, 3H), 2.34 (d,  $J = 7.1$  Hz, 1H), 2.09 (d,  $J = 4.4$  Hz, 1H) ppm;  $^{13}\text{C NMR}$  (100 MHz,  $\text{C}_6\text{D}_6$ )  $\delta$  152.4, 94.3, 40.4, 39.1, 30.7, 6.7, 5.0 ppm; IR ( $\text{CH}_2\text{Cl}_2$ ) 3062, 2958, 2877, 1635 (C=C), 1458, 1411  $\text{cm}^{-1}$ ; LRMS (EI, 20 eV)  $m/z$  277 ( $\text{M}^+$ , 1), 248 (100), 220 (89), 206 (35), 190 (3), 181 (1); HRMS (EI, 20 eV) Calculated for  $\text{C}_{11}\text{H}_{23}\text{NO}_3\text{SSi}$  ( $\text{M}^+$ ) 277.1162, Found 277.1164.

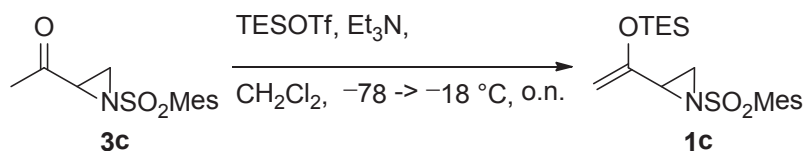

To a solution of **3c** (0.6404 g, 2.400 mmol) in  $\text{CH}_2\text{Cl}_2$  (20 mL) at  $-78^\circ\text{C}$  was added  $\text{Et}_3\text{N}$  (1.3 mL, 9.2 mmol) and TESOTf (1.4 mL, 6.2 mmol). The resulting mixture was stirred overnight from  $-78^\circ\text{C}$  to  $-18^\circ\text{C}$ . The reaction was quenched with aqueous  $\text{NaHCO}_3$  and extracted with  $\text{Et}_2\text{O}$ . The

Supplementary Material (ESI) for Chemical Communications  
This journal is (c) The Royal Society of Chemistry 2013

combined organic layers were dried over anhydrous  $\text{MgSO}_4$ . The volatiles were removed *in vacuo* and the residue was purified by flash column chromatography using 3% EtOAc and 0.1%  $\text{Et}_3\text{N}$  in hexane to afford **1c** (0.8569 g, 94% yield). **1-(Mesitylsulfonyl)-2-(1-(triethylsiloxy)vinyl)aziridine (1c)**: Colourless oil;  $R_f = 0.36$  (5% EtOAc in hexane);  $^1\text{H}$  NMR (400 MHz,  $\text{C}_6\text{D}_6$ )  $\delta$  6.60 (s, 2H), 4.23 (d,  $J = 1.5$  Hz, 1H), 4.13 (d,  $J = 1.5$  Hz, 1H), 3.23 (dd,  $J = 7.0, 4.3$  Hz, 1H), 2.74 (s, 6H), 2.48 (d,  $J = 7.0$  Hz, 1H), 2.10 (d,  $J = 4.3$  Hz, 1H), 1.91 (s, 3H), 0.83 (t,  $J = 7.9$  Hz, 9H), 0.49 (q,  $J = 7.9$  Hz, 6H) ppm;  $^{13}\text{C}$  NMR (100 MHz,  $\text{C}_6\text{D}_6$ )  $\delta$  152.8, 142.8, 140.2, 133.8, 132.0, 93.7, 40.7, 30.6, 23.3, 20.7, 6.7, 5.0 ppm; IR ( $\text{CH}_2\text{Cl}_2$ ) 2962, 2916, 2877, 1635 (C=C), 1604, 1566  $\text{cm}^{-1}$ ; LRMS (EI, 20 eV)  $m/z$  381 ( $\text{M}^+$ , 4), 352 (58), 317 (8), 269 (5), 205 (8), 198 (14), 119 (100), 115 (50), 87 (44), 77 (23); HRMS (EI, 20 eV): Calculatd for  $\text{C}_{19}\text{H}_{31}\text{NO}_3\text{SSi}$  ( $\text{M}^+$ ) 381.1788, Found 381.1793.

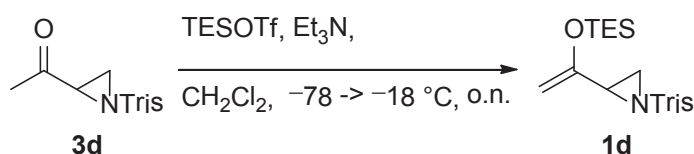

To a solution of **3d** (0.6509 g, 1.854 mmol) in  $\text{CH}_2\text{Cl}_2$  (20 mL) at  $-78$  °C was added  $\text{Et}_3\text{N}$  (0.8 mL, 5.7 mmol) and TESOTf (0.9 mL, 4.0 mmol). The resulting mixture was stirred overnight from  $-78$  °C to  $-18$  °C. The reaction was quenched with aqueous  $\text{NaHCO}_3$  and extracted with  $\text{Et}_2\text{O}$ . The combined organic layers were dried over anhydrous  $\text{MgSO}_4$ . The volatiles were removed *in vacuo* and the residue was purified by flash column chromatography using 2% EtOAc and 0.1%  $\text{Et}_3\text{N}$  in hexane to afford **1d** (0.7655 g, 89% yield). **2-(1-(Triethylsiloxy)vinyl)-1-((2,4,6-triisopropylphenyl)sulfonyl) aziridine (1d)**: Colourless oil;  $R_f = 0.47$  (5% EtOAc in hexane);  $^1\text{H}$  NMR (400 MHz,  $\text{C}_6\text{D}_6$ )  $\delta$  7.19 (s, 2H), 4.70 (septet,  $J = 6.8$  Hz, 2H), 4.26 (d,  $J = 1.6$  Hz, 1H), 4.14 (d,  $J = 1.6$  Hz, 1H), 3.35 (dd,  $J = 7.0, 4.4$  Hz, 1H), 2.63 (septet,  $J = 6.9$  Hz, 1H), 2.51 (d,  $J = 7.0$  Hz, 1H), 2.11 (d,  $J = 4.4$  Hz, 1H), 1.35 (d,  $J = 7.1$  Hz, 6H), 1.33 (d,  $J = 7.1$  Hz, 6H), 1.08 (d,  $J = 6.9$  Hz, 6H), 0.85 (t,  $J = 7.8$  Hz, 9H), 0.53 (q,  $J = 7.8$  Hz, 6H) ppm;  $^{13}\text{C}$  NMR (100 MHz,  $\text{C}_6\text{D}_6$ )  $\delta$  153.5, 152.8, 151.7, 132.9, 124.0, 93.4, 40.9, 34.4, 31.6, 30.1, 25.3, 25.2, 23.6, 6.7, 5.0 ppm; IR ( $\text{CH}_2\text{Cl}_2$ ) 2960, 2933, 2875, 1635 (C=C), 1598, 1560  $\text{cm}^{-1}$ ; LRMS (EI, 20 eV)  $m/z$  465 ( $\text{M}^+$ , 1), 450 (3), 436 (59), 396 (88), 386 (10), 381 (14), 366 (23), 267 (33); HRMS (EI, 20 eV) Calculated for  $\text{C}_{25}\text{H}_{43}\text{NO}_3\text{SSi}$  ( $\text{M}^+$ ) 465.2727, Found 465.2731.

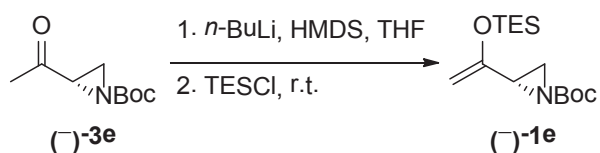

Supplementary Material (ESI) for Chemical Communications  
This journal is (c) The Royal Society of Chemistry 2013

To a solution of HMDS (2.8 mL, 13 mmol) in anhydrous THF (10 mL) at 0 °C was added *n*-BuLi (1.28 M in hexane, 6.6 mL, 9.5 mmol). The mixture was stirred for 30 min at 0 °C and then cooled to -78 °C. To this was added (-)-**3e** (1.1938 g, 4.6752 mmol) in THF (4.0 mL) via cannula. The resulting solution was stirred for 1 h at -78 °C. TESCl (0.700 mL, 4.17 mmol) was added and the reaction was allowed to warm to room temperature. After stirring for 1 h, aqueous NaHCO<sub>3</sub> was added and the mixture was extracted with Et<sub>2</sub>O (30 mL x 3), separated and dried over anhydrous MgSO<sub>4</sub>. The volatiles were removed *in vacuo* and the residue was purified by flash column chromatography using 2% EtOAc and 1% Et<sub>3</sub>N in hexane to afford (-)-**1e** (0.6596 g, 53% yield).  
**(S)-tert-Butyl 2-(1-(triethylsiloxy)vinyl)aziridine-1-carboxylate ((-)-1e)**: Colourless oil; *R<sub>f</sub>* = 0.41 (5% EtOAc in hexane);  $[\alpha]_{\text{D}}^{20} = -70.9^{\circ}$  (*c* = 1.13, CH<sub>2</sub>Cl<sub>2</sub>); <sup>1</sup>H NMR (400 MHz, C<sub>6</sub>D<sub>6</sub>) δ 4.44 (d, *J* = 1.2 Hz, 1H), 4.29 (d, *J* = 1.2 Hz, 1H), 2.74 (dd, *J* = 5.8, 3.5 Hz, 1H), 2.24 (dd, *J* = 3.5, 1.2 Hz, 1H), 2.07 (dd, *J* = 5.8, 1.2 Hz, 1H), 1.36 (s, 9H), 0.97 (t, *J* = 8.0 Hz, 9H), 0.64 (q, *J* = 8.0 Hz, 6H) ppm; <sup>13</sup>C NMR (100 MHz, C<sub>6</sub>D<sub>6</sub>) δ 1641.6, 154.4, 93.0, 80.3, 39.5, 30.3, 28.0, 6.9, 5.2 ppm; IR (CH<sub>2</sub>Cl<sub>2</sub>) 3067, 3044, 2992, 2980, 1715 (C=O), 1634, 1458, 1416, 1369, 1288, 1007 cm<sup>-1</sup>; LRMS (EI, 20 eV) *m/z* 242 (M<sup>+</sup>-C<sub>4</sub>H<sub>9</sub>, 4), 240 (6), 214 (55), 199 (23), 170 (71), 142 (45), 128 (50), 115 (70), 103 (74), 87 (100), 75 (60); HRMS (EI, 20 eV) Calculated for C<sub>11</sub>H<sub>20</sub>NO<sub>3</sub>Si (M<sup>+</sup>-C<sub>4</sub>H<sub>9</sub>) 242.1212, Found 242.1208.

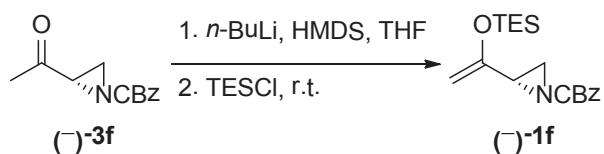

To a solution of HMDS (0.250 mL, 1.18 mmol) in anhydrous THF (0.8 mL) at 0 °C was added *n*-BuLi (1.09 M in hexane, 0.6 mL, 0.7 mmol). The mixture was stirred for 30 min at 0 °C and then cooled to -78 °C. To this was added (-)-**3f** (0.0723 g, 0.330 mmol) in THF (1.0 mL) via cannula. The resulting solution was stirred for 1 h at -78 °C. TESCl (0.050 mL, 0.30 mmol) was added and the reaction was allowed to warm to room temperature. After stirring for 1 h, aqueous NaHCO<sub>3</sub> was added and the mixture was extracted with Et<sub>2</sub>O (10 mL x 3), separated and dried over anhydrous MgSO<sub>4</sub>. The volatiles were removed *in vacuo* and the residue was purified by flash column chromatography using 2% EtOAc and 1% Et<sub>3</sub>N in hexane to afford (-)-**1f** (0.0430 g, 43% yield).  
**(S)-Benzyl 2-(1-(triethylsiloxy)vinyl)aziridine-1-carboxylate((-)-1f)**: Colourless oil; *R<sub>f</sub>* = 0.46 (5% EtOAc in hexane);  $[\alpha]_{\text{D}}^{20} = -37.8^{\circ}$  (*c* = 0.50, CH<sub>2</sub>Cl<sub>2</sub>); <sup>1</sup>H NMR (400 MHz, CDCl<sub>3</sub>) δ 7.36-7.30 (m, 5H), 5.15 (d, *J* = 12.4 Hz, 1H), 5.1 (d, *J* = 12.4 Hz, 1H), 4.50 (s, 1H), 4.34 (s, 1H), 2.96 (dd, *J* = 5.5, 3.7 Hz, 1H), 2.44 (d, *J* = 3.6 Hz, 1H), 2.33 (d, *J* = 5.5 Hz, 1H), 0.96 (t, *J* = 8.0 Hz, 9H), 0.69 (q, *J* = 8.0 Hz,

Supplementary Material (ESI) for Chemical Communications  
This journal is (c) The Royal Society of Chemistry 2013

6H) ppm;  $^{13}\text{C}$  NMR (100 MHz,  $\text{CDCl}_3$ )  $\delta$  162.3, 152.6, 136.0, 128.6, 128.3, 128.1, 93.8, 68.1, 39.8, 29.8, 6.7, 4.9 ppm; IR ( $\text{CH}_2\text{Cl}_2$ ) 3065, 3046, 2959, 2940, 1721 (C=O), 1634, 1385, 1300, 1194  $\text{cm}^{-1}$ ; LRMS (EI, 20 eV)  $m/z$  304 ( $\text{M}^+ - \text{C}_2\text{H}_5$ , 1), 260 (7), 198 (4), 115 (10), 91 (100); HRMS (EI, 20 eV) Calculated for  $\text{C}_{16}\text{H}_{22}\text{NO}_3\text{Si}$  ( $\text{M}^+ - \text{C}_2\text{H}_5$ ) 304.1369, Found 304.1362.

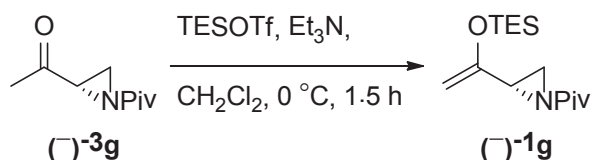

To a solution of **(-)-3g** (0.9000 g, 5.319 mmol) in  $\text{CH}_2\text{Cl}_2$  (26.6 mL) at  $-78\text{ }^\circ\text{C}$  was added  $\text{Et}_3\text{N}$  (1.5 mL, 11 mmol) and TESOTf (1.8 mL, 7.9 mmol). The resulting mixture was stirred at  $0\text{ }^\circ\text{C}$  for 1.5 h. The reaction was quenched with aqueous  $\text{NaHCO}_3$ , extracted with  $\text{Et}_2\text{O}$  (30 mL x 3), separated and dried over anhydrous  $\text{MgSO}_4$ . The volatiles were removed *in vacuo* and the residue was purified by flash column chromatography using 1% EtOAc and 1%  $\text{Et}_3\text{N}$  in hexane to afford **(-)-1g** (1.3941 g, 92% yield). **(S)-2,2-Dimethyl-1-(2-(1-(triethylsilyloxy)vinyl)aziridin-1-yl)propan-1-one ((-)-1g)**: Colourless oil;  $R_f = 0.56$  (5% EtOAc in hexane);  $[\alpha]_D^{20} = -77.8^\circ$  ( $c = 0.38$ ,  $\text{CH}_2\text{Cl}_2$ );  $^1\text{H}$  NMR (400 MHz,  $\text{C}_6\text{D}_6$ )  $\delta$  4.34 (d,  $J = 1.3$  Hz, 1H), 4.25 (d,  $J = 1.3$  Hz, 1H), 2.63 (dd,  $J = 6.0, 3.4$  Hz, 1H), 2.23 (dd,  $J = 6.0, 1.0$  Hz, 1H), 2.17 (dd,  $J = 3.4, 1.2$  Hz, 1H), 1.22 (s, 9H), 0.95 (t,  $J = 8.0$  Hz, 9H), 0.62 (q,  $J = 8.0$  Hz, 6H) ppm;  $^{13}\text{C}$  NMR (100 MHz,  $\text{C}_6\text{D}_6$ )  $\delta$  190.2, 154.6, 92.5, 41.3, 39.8, 29.1, 28.0, 6.8, 5.2 ppm; IR ( $\text{CH}_2\text{Cl}_2$ ) 3044, 2980, 2961, 1682 (C=O), 1633, 1479, 1458, 1416, 1366, 1296, 1287, 1244, 1119  $\text{cm}^{-1}$ ; LRMS (EI, 20 eV)  $m/z$  283 ( $\text{M}^+$ , 13), 254 (28), 227 (15), 198 (35), 171 (45), 143 (70), 129 (27), 115 (78), 87 (100), 75 (28); HRMS (EI, 20 eV) Calculated for  $\text{C}_{15}\text{H}_{29}\text{NO}_2\text{Si}$  ( $\text{M}^+$ ) 283.1968, Found 283.1960.

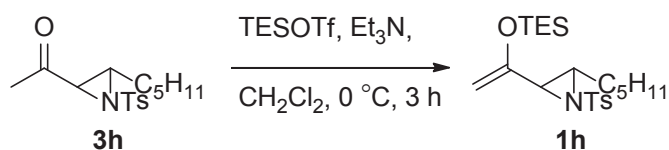

To a solution of **3h** (0.5884 g, 1.902 mmol) in  $\text{CH}_2\text{Cl}_2$  (20 mL) at  $-78\text{ }^\circ\text{C}$  was added  $\text{Et}_3\text{N}$  (0.8 mL, 5.8 mmol) and TESOTf (0.85 mL, 3.7 mmol). The resulting mixture was stirred at  $0\text{ }^\circ\text{C}$  for 3 h. The reaction was quenched with aqueous  $\text{NaHCO}_3$ , extracted with  $\text{Et}_2\text{O}$  (50 mL x 3), separated and dried over anhydrous  $\text{MgSO}_4$ . The volatiles were removed *in vacuo* and the residue was purified by flash column chromatography using 7% EtOAc and 1%  $\text{Et}_3\text{N}$  in hexane to afford **1h** (0.8041 g, 100% yield). **(2R\*,3S\*)-2-Pentyl-1-tosyl-3-(1-(triethylsilyloxy)vinyl)aziridine (1h)**: Colourless oil;  $R_f = 0.68$  (10% EtOAc in hexane);  $^1\text{H}$  NMR (400 MHz,  $\text{C}_6\text{D}_6$ )  $\delta$  7.96 (d,  $J = 8.2$  Hz, 2H), 6.76 (d,  $J$

Supplementary Material (ESI) for Chemical Communications  
This journal is (c) The Royal Society of Chemistry 2013

= 8.1 Hz, 2H), 4.30 (d,  $J = 1.1$  Hz, 1H), 4.17 (d,  $J = 1.1$  Hz, 1H), 3.42 (d,  $J = 4.3$  Hz, 1H), 2.93 (qd,  $J = 4.9, 4.3$  Hz, 1H), 2.40-2.32 (m, 1H), 2.09-2.00 (m, 1H), 1.87 (s, 3H), 1.51-1.40 (m, 1H), 1.38-1.27 (m, 1H), 1.21-1.12 (m, 4H), 0.87-0.79 (m, 12H), 0.46 (q,  $J = 7.7$  Hz, 6H) ppm;  $^{13}\text{C}$  NMR (100 MHz,  $\text{C}_6\text{D}_6$ )  $\delta$  153.5, 143.4, 139.5, 129.5, 127.8, 93.3, 49.5, 49.1, 31.6, 28.6, 28.0, 22.8, 21.1, 14.1, 6.8, 5.0 ppm; IR ( $\text{CH}_2\text{Cl}_2$ ) 3068, 2996, 2960, 2934, 2876, 1636, 1599, 1458, 1416, 1321, 1261, 1159  $\text{cm}^{-1}$ ; LRMS (EI, 20 eV)  $m/z$  394 ( $\text{M}^+ - \text{C}_2\text{H}_5$ , 6), 352 (7), 268 (100), 183 (12), 155 (15), 115 (74), 87 (77), 77 (29); HRMS (EI, 20 eV) Calculated for  $\text{C}_{20}\text{H}_{32}\text{NO}_3\text{SSi}$  ( $\text{M}^+ - \text{C}_2\text{H}_5$ ) 394.1872, Found 394.1867.

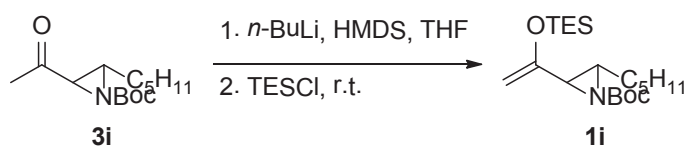

To a solution of HMDS (3.0 mL, 14 mmol) in anhydrous THF (10 mL) at 0 °C was added *n*-BuLi (1.28 M in hexane, 7.4 mL, 9.5 mmol). The mixture was stirred for 30 min at 0 °C and then cooled to -78 °C. To this was added **3i** (1.1938 g, 4.6752 mmol) in THF (4.0 mL) via cannula. The resulting solution was stirred for 1 h at -78 °C. TESCl (0.750 mL, 4.47 mmol) was added and the reaction was allowed to warm to room temperature. After stirring for 1 h, aqueous  $\text{NaHCO}_3$  was added and the mixture was extracted with  $\text{Et}_2\text{O}$  (30 mL x 3), separated and dried over anhydrous  $\text{MgSO}_4$ . The volatiles were removed *in vacuo* and the residue was purified by flash column chromatography using 1% EtOAc and 1%  $\text{Et}_3\text{N}$  in hexane to afford **1i** (1.1823 g, 72% yield). **(2*R*\*,3*S*\*)-tert-Butyl 2-pentyl-3-(1-(triethylsiloxy)vinyl)aziridine-1-carboxylate (1i)**: Colourless oil;  $R_f = 0.43$  (5% EtOAc in hexane);  $^1\text{H}$  NMR (400 MHz,  $\text{C}_6\text{D}_6$ )  $\delta$  4.47 (d,  $J = 1.4$  Hz, 1H), 4.33 (d,  $J = 1.4$  Hz, 1H), 2.75 (td,  $J = 6.3, 3.0$  Hz, 1H), 2.70 (d,  $J = 3.0$  Hz, 1H), 1.69-1.59 (m, 1H), 1.44 (s, 9H), 1.41-1.36 (m, 1H), 1.30-1.24 (m, 1H), 1.23-1.17 (m, 5H), 1.00 (t,  $J = 8.0$  Hz, 9H), 0.84 (t,  $J = 6.9$  Hz, 3H), 0.67 (q,  $J = 8.0$  Hz, 6H) ppm;  $^{13}\text{C}$  NMR (100 MHz,  $\text{C}_6\text{D}_6$ )  $\delta$  160.1, 154.2, 93.2, 79.9, 46.0, 41.9, 31.8, 31.5, 28.2, 27.1, 23.0, 14.2, 7.0, 5.3 ppm; IR ( $\nu$ ) 3051, 2959, 2934, 2878, 1713 (C=O), 1632, 1458, 1422, 1319, 1157  $\text{cm}^{-1}$ ; LRMS (EI, 20 eV)  $m/z$  312 ( $\text{M}^+ - \text{C}_4\text{H}_9$ , 1), 268 (86), 140 (30), 198 (53), 182 (12), 157 (11), 115 (100), 87 (99); HRMS (EI, 20 eV) Calculated for  $\text{C}_{16}\text{H}_{30}\text{NO}_3\text{Si}$  ( $\text{M}^+ - \text{C}_4\text{H}_9$ ) 312.1995, Found 312.2006.

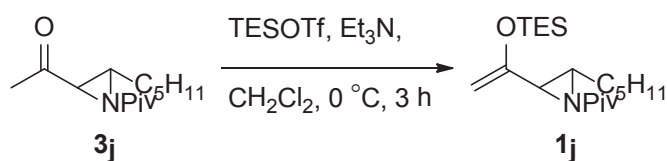

To a solution of **3j** (0.3837 g, 1.603 mmol) in  $\text{CH}_2\text{Cl}_2$  (8.6 mL) at -78 °C was added  $\text{Et}_3\text{N}$  (0.5 mL,

Supplementary Material (ESI) for Chemical Communications  
This journal is (c) The Royal Society of Chemistry 2013

3.6 mmol) and TESOTf (0.6 mL, 3 mmol). The resulting mixture was stirred at 0 °C for 3 h. The reaction was quenched with aqueous NaHCO<sub>3</sub>, extracted with Et<sub>2</sub>O (30 mL x 3), separated and dried over anhydrous MgSO<sub>4</sub>. The volatiles were removed *in vacuo* and the residue was purified by flash column chromatography using 3% EtOAc and 1% Et<sub>3</sub>N in hexane to afford **1j** (0.4677 g, 83% yield).

**2,2-Dimethyl-1-((2*R*\*,3*S*\*)-2-pentyl-3-(1-(triethylsiloxy)vinyl)aziridin-1-yl)propan-1-one (1j):** Colourless oil; *R<sub>f</sub>* = 0.46 (5% EtOAc in hexane); <sup>1</sup>H NMR (400 MHz, C<sub>6</sub>D<sub>6</sub>) δ 4.32 (d, *J* = 1.6 Hz, 1H), 4.21 (d, *J* = 1.6 Hz, 1H), 2.88 (ddd, *J* = 7.0, 5.6, 2.9 Hz, 1H), 2.78 (d, *J* = 2.9 Hz, 1H), 1.72-1.63 (m, 1H), 1.41-1.36 (m, 2H), 1.35 (s, 9H), 1.30-1.18 (m, 5H), 0.96 (t, *J* = 8.0 Hz, 9H), 0.85 (t, *J* = 6.8 Hz, 3H), 0.64 (q, *J* = 8.0 Hz, 6H) ppm; <sup>13</sup>C NMR (100 MHz, C<sub>6</sub>D<sub>6</sub>) δ 187.5, 155.0, 92.7, 48.1, 41.0, 39.7, 31.9, 31.7, 28.0, 27.2, 22.9, 14.2, 6.9, 5.2 ppm; IR (CH<sub>2</sub>Cl<sub>2</sub>) 3061, 3050, 2959, 2936, 1667 (C=O), 1423, 1283 cm<sup>-1</sup>; LRMS (EI, 20 eV) *m/z* 353 (M<sup>+</sup>, 9), 324 (21), 282 (25), 268 (100), 115 (66), 87 (55); HRMS (EI, 20 eV) Calculated for C<sub>20</sub>H<sub>39</sub>NO<sub>2</sub>Si (M<sup>+</sup>) 353.2750, Found 353.2752.

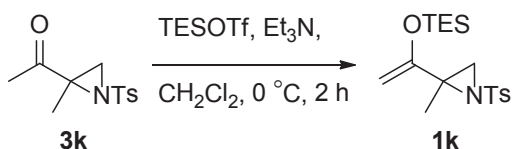

To a solution of **3k** (0.8323 g, 3.286 mmol) in CH<sub>2</sub>Cl<sub>2</sub> (35 mL) at -78 °C was added Et<sub>3</sub>N (1.4 mL, 10 mmol) and TESOTf (1.5 mL, 6.6 mmol). The resulting mixture was stirred at 0 °C for 2 h. The reaction was quenched with aqueous NaHCO<sub>3</sub>, extracted with Et<sub>2</sub>O (100 mL x 3), separated and dried over anhydrous MgSO<sub>4</sub>. The volatiles were removed *in vacuo* and the residue was purified by flash column chromatography using 5% EtOAc and 1% Et<sub>3</sub>N in hexane to afford **1k** (1.1232 g, 93% yield). **2-Methyl-1-tosyl-2-(1-(triethylsiloxy)vinyl)aziridine (1k):** Colourless oil; *R<sub>f</sub>* = 0.34 (5% EtOAc in hexane); <sup>1</sup>H NMR (400 MHz, C<sub>6</sub>D<sub>6</sub>) δ 7.91 (d, *J* = 8.2 Hz, 2H), 6.76 (d, *J* = 8.2 Hz, 2H), 4.46 (d, *J* = 1.1 Hz, 1H), 4.25 (d, *J* = 1.1 Hz, 1H), 2.52 (s, 1H), 2.28 (s, 1H), 1.94 (s, 3H), 1.86 (s, 3H), 0.90 (t, *J* = 7.9 Hz, 9H), 0.56 (q, *J* = 7.9 Hz, 6H) ppm; <sup>13</sup>C NMR (100 MHz, C<sub>6</sub>D<sub>6</sub>) δ 157.1, 143.4, 139.3, 129.5, 127.8, 91.8, 49.9, 39.8, 21.1, 16.7, 6.9, 5.1 ppm; IR (CH<sub>2</sub>Cl<sub>2</sub>) 3050, 2959, 2878, 1634, 1599, 1458, 1321, 1285, 1186, 1159 cm<sup>-1</sup>; LRMS (EI, 20 eV) *m/z* 338 (M<sup>+</sup>-C<sub>2</sub>H<sub>5</sub>, 84), 212 (78), 155 (48), 155 (88), 91 (100); HRMS (EI, 20 eV) Calculated for C<sub>16</sub>H<sub>24</sub>NO<sub>3</sub>SSi (M<sup>+</sup>-C<sub>2</sub>H<sub>5</sub>) 338.1246, Found 338.1241.

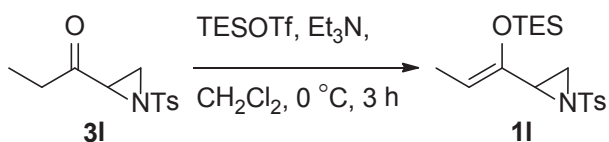

Supplementary Material (ESI) for Chemical Communications  
This journal is (c) The Royal Society of Chemistry 2013

To a solution of **31** (0.6970 g, 2.751 mmol) in CH<sub>2</sub>Cl<sub>2</sub> (27.5 mL) at -78 °C was added Et<sub>3</sub>N (1.150 mL, 8.274 mmol) and TESOTf (1.250 mL, 5.485 mmol). The resulting mixture was stirred at 0 °C for 3 h. The reaction was quenched with aqueous NaHCO<sub>3</sub>, extracted with Et<sub>2</sub>O (100 mL x 3), separated and dried over anhydrous MgSO<sub>4</sub>. The volatiles were removed *in vacuo* and the residue was purified by flash column chromatography using 4% EtOAc and 1% Et<sub>3</sub>N in hexane to afford **11** (0.8280 g, 82% yield). **(Z)-1-Tosyl-2-(1-(triethylsiloxy)prop-1-en-1-yl)aziridine (11)**: White solid; mp: 52-58 °C; R<sub>f</sub> = 0.29 (5% EtOAc in hexane); <sup>1</sup>H NMR (500 MHz, C<sub>6</sub>D<sub>6</sub>) δ 7.85 (d, *J* = 8.2 Hz, 2H), 6.75 (d, *J* = 8.1 Hz, 2H), 4.66 (q, *J* = 6.8 Hz, 1H), 3.30 (dd, *J* = 7.1, 4.5 Hz, 1H), 2.44 (d, *J* = 7.1 Hz, 1H), 2.07 (d, *J* = 4.5 Hz, 1H), 1.84 (s, 3H), 1.44 (d, *J* = 6.7 Hz, 3H), 0.92 (t, *J* = 8.0 Hz, 9H), 0.60 (qd, *J* = 7.7, 2.7 Hz, 6H) ppm; <sup>13</sup>C NMR (125 MHz, C<sub>6</sub>D<sub>6</sub>) δ 145.6, 144.4, 137.0, 130.0, 128.7, 108.0, 42.2, 31.8, 21.5, 11.4, 7.3, 6.1 ppm; IR (CH<sub>2</sub>Cl<sub>2</sub>) 3071, 2959, 2878, 1674, 1599, 1387 cm<sup>-1</sup>; LRMS (EI, 20 eV) *m/z* 367 (M<sup>+</sup>, 2), 338 (85), 310 (11), 256 (21), 224 (55), 212 (40), 155 (66), 115 (61), 91 (100); HRMS (EI, 20 eV) Calculated for C<sub>18</sub>H<sub>29</sub>NO<sub>3</sub>SSi (M<sup>+</sup>) 367.1637, Found 367.1648.

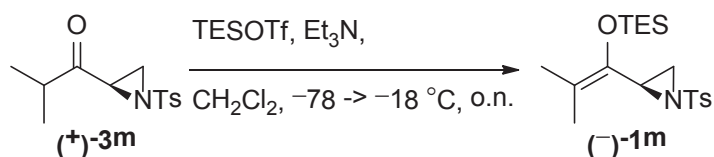

To a solution of (+)-**3m** (2.137 g, 8.002 mmol) in CH<sub>2</sub>Cl<sub>2</sub> (40 mL) at -78 °C was added Et<sub>3</sub>N (4.5 mL, 32 mmol) and TESOTf (5.4 mL, 24 mmol). The resulting mixture was stirred overnight from -78 °C to -18 °C. The reaction was quenched with aqueous NaHCO<sub>3</sub> and extracted with Et<sub>2</sub>O. The combined organic layers were dried over anhydrous MgSO<sub>4</sub>. The volatiles were removed *in vacuo* and the residue was purified by flash column chromatography using 5% EtOAc and 0.1% Et<sub>3</sub>N in hexane to afford (-)-**1m** (1.6641 g, 55% yield). **(R)-2-(2-Methyl-1-(triethylsiloxy)prop-1-en-1-yl)-1-tosyl aziridine ((-)-1m)**: White solid; mp: 56-59 °C; R<sub>f</sub> = 0.43 (10% EtOAc in hexane); <sup>1</sup>H NMR (400 MHz, C<sub>6</sub>D<sub>6</sub>) δ 7.85 (d, *J* = 8.3 Hz, 2H), 6.79 (d, *J* = 8.3 Hz, 2H), 3.78 (dd, *J* = 7.1, 4.5 Hz, 1H), 2.49 (d, *J* = 7.1 Hz, 1H), 2.24 (d, *J* = 4.5 Hz, 1H), 1.87 (s, 3H), 1.55 (s, 3H), 1.54 (s, 3H), 0.92 (t, *J* = 7.9 Hz, 9H), 0.70-0.57 (m, 6H) ppm; <sup>13</sup>C NMR (100 MHz, C<sub>6</sub>D<sub>6</sub>) δ 144.1, 138.2, 136.6, 129.6, 128.3, 117.0, 38.1, 31.0, 21.1, 18.9, 18.0, 7.1, 5.7 ppm; IR (CH<sub>2</sub>Cl<sub>2</sub>) 3068, 2958, 2915, 2877, 1673 (C=C), 1598 cm<sup>-1</sup>; LRMS (EI, 20 eV) *m/z* 381 (M<sup>+</sup>, 5), 352 (35), 256 (45), 226 (64), 224 (48), 210 (13), 196 (13), 177 (10); HRMS (EI, 20 eV) Calculated for C<sub>19</sub>H<sub>31</sub>NO<sub>3</sub>SSi (M<sup>+</sup>) 381.1788, Found 381.1789.

## General Experimental Procedure for (4+3) Cycloadditions

To a solution of the aziridinyl enolsilane in EtNO<sub>2</sub> (or other reaction solvent) pre-cooled to -90 °C (or alternative target temperature) was added the diene and TFA (or TfOH). The progress of the reaction was monitored by TLC. When the reaction was complete as judged by TLC, aqueous NaHCO<sub>3</sub> was added to the reaction mixture. The organic layer was separated. The aqueous layer was back extracted with EtOAc. The combined organic layers were dried over anhydrous MgSO<sub>4</sub>. The volatiles were removed *in vacuo* and the residue was purified by flash column chromatography on silica gel.

### (4 + 3) Cycloadditions of aziridinyl enolsilanes **1a** with furan (Table 1, Selected entries)

Table 1, entry 1:

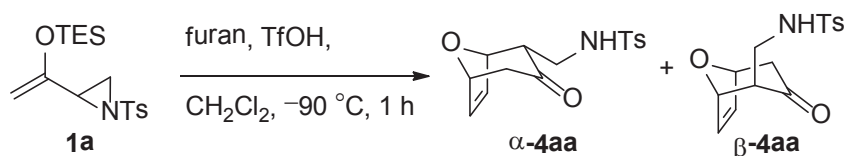

According to the general procedure for the cycloaddition reaction, aziridinyl enolsilane **1a** (0.3521 g, 0.9975 mmol) in EtNO<sub>2</sub> (10 mL) was subjected to reaction with furan (0.36 mL, 5.0 mmol) and TFA (0.100 mL, 1.13 mmol) at -90 °C. After 1 h, aqueous NaHCO<sub>3</sub> was added and the reaction was worked up. The crude product was purified by flash column chromatography using 35% EtOAc in hexane to afford cycloadducts  $\alpha$ -**4aa** and  $\beta$ -**4aa** (0.1715 g, 56% yield, 60:40).

**4-Methyl-N-(((1R\*,2S\*,5R\*)-3-oxo-8-oxabicyclo[3.2.1]oct-6-en-2-yl)methyl)benzenesulfonamide ( $\alpha$ -**4aa**):** White solid; mp: 117-119 °C;  $R_f$  = 0.21 (35% EtOAc in hexane); <sup>1</sup>H NMR (500 MHz, C<sub>6</sub>D<sub>6</sub>)  $\delta$  7.85 (d,  $J$  = 8.2 Hz, 2H), 6.90 (d,  $J$  = 8.2 Hz, 2H), 6.00 (dd,  $J$  = 6.0, 1.6 Hz, 1H), 5.65 (dd,  $J$  = 6.0, 1.6 Hz, 1H), 5.14 (dd,  $J$  = 7.6, 5.9 Hz, 1H), 4.80 (dd,  $J$  = 4.5, 1.6 Hz, 1H), 4.48 (d,  $J$  = 5.0 Hz, 1H), 3.01-2.93 (m, 2H), 2.70-2.67 (m, 1H), 2.29 (dd,  $J$  = 15.5, 5.0 Hz, 1H), 2.00 (s, 3H), 1.91 (d,  $J$  = 15.5 Hz, 1H) ppm; <sup>13</sup>C NMR (125 MHz, C<sub>6</sub>D<sub>6</sub>)  $\delta$  206.4, 143.3, 138.4, 134.8, 132.4, 130.1, 127.7, 79.8, 78.2, 57.2, 45.8, 40.8, 21.4 ppm; IR (CH<sub>2</sub>Cl<sub>2</sub>) 3380 (NH), 3059, 2965, 2926, 1709 (C=O), 1653 (C=C), 1410 cm<sup>-1</sup>; LRMS (EI, 20 eV)  $m/z$  307 (M<sup>+</sup>, 1), 239 (13), 184 (15), 171 (21), 155 (51); HRMS (EI, 20 eV) Calculated for C<sub>15</sub>H<sub>17</sub>NO<sub>4</sub>S (M<sup>+</sup>) 307.0873, Found 307.0871.

**4-Methyl-N-(((1S\*,2S\*,5S\*)-3-oxo-8-oxabicyclo[3.2.1]oct-6-en-2-yl)methyl)benzenesulfonamide ( $\beta$ -**4aa**):** White solid; mp: 137-139 °C;  $R_f$  = 0.17 (35% EtOAc in hexane); <sup>1</sup>H NMR (500 MHz, C<sub>6</sub>D<sub>6</sub>)  $\delta$  7.90 (d,  $J$  = 8.2 Hz, 2H), 6.91 (d,  $J$  = 8.3 Hz, 2H), 5.64 (dd,  $J$  = 6.1, 1.5 Hz, 1H), 5.62 (dd,  $J$  = 6.1, 1.4 Hz, 1H), 5.21 (t,  $J$  = 6.0 Hz, 1H), 4.45 (s, 1H), 4.42 (d,  $J$  = 5.2 Hz, 1H), 3.33-3.22 (m, 2H),



Supplementary Material (ESI) for Chemical Communications  
This journal is (c) The Royal Society of Chemistry 2013

2.35 (dd,  $J = 16.8, 5.2$  Hz, 1H), 2.21 (t,  $J = 7.1$  Hz, 1H), 2.00 (s, 3H), 1.91 (d,  $J = 16.8$  Hz, 1H) ppm;  $^{13}\text{C}$  NMR (125 MHz,  $\text{C}_6\text{D}_6$ )  $\delta$  205.7, 143.3, 138.3, 134.5, 133.1, 130.1, 127.9, 79.3, 77.7, 55.5, 45.4, 44.1, 21.4 ppm; IR ( $\text{CH}_2\text{Cl}_2$ ) 3683 (NH), 3063, 2957, 2927, 2855, 1717 (C=O), 1605 (C=C), 1465  $\text{cm}^{-1}$ ; LRMS (EI, 20 eV)  $m/z$  307 ( $\text{M}^+$ , 2), 261 (6), 239 (4), 226 (2), 184 (33), 171 (19), 155 (68); HRMS (EI, 20 eV) Calculatd for  $\text{C}_{15}\text{H}_{17}\text{NO}_4\text{S}$  ( $\text{M}^+$ ) 307.0873, Found 307.0873.

**Table 1, entry 2:**

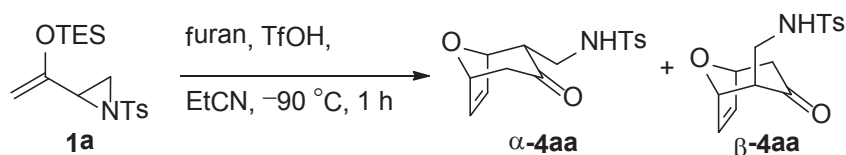

According to the general procedure for the cycloaddition reaction, aziridinyl enolsilane **1a** (0.3543 g, 1.003 mmol) in EtCN (10 mL) was subjected to reaction with furan (0.36 mL, 5.0 mmol) and TfOH (0.100 mL, 1.13 mmol) at  $-90$  °C. After 1 h, aqueous  $\text{NaHCO}_3$  was added and the reaction was worked up. The crude product was purified by flash column chromatography using 35% EtOAc in hexane to afford cycloadducts  **$\alpha$ -4aa** and  **$\beta$ -4aa** (0.2104 g, 68% yield, 38:62).

**Table 1, entry 3:**

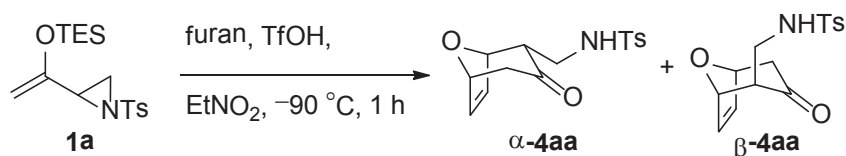

According to the general procedure for the cycloaddition reaction, aziridinyl enolsilane **1a** (0.3531 g, 0.9999 mmol) in EtNO<sub>2</sub> (10 mL) was subjected to reaction with furan (0.36 mL, 5.0 mmol) and TfOH (0.100 mL, 1.13 mmol) at  $-90$  °C. After 1 h, aqueous  $\text{NaHCO}_3$  was added and the reaction was worked up. The crude product was purified by flash column chromatography using 35% EtOAc in hexane to afford cycloadducts  **$\alpha$ -4aa** and  **$\beta$ -4aa** (0.2628 g, 86% yield, 50:50).

**Table 1, entry 6:**

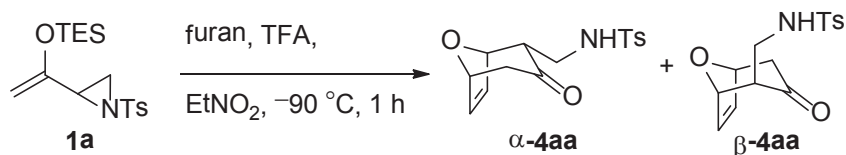

According to the general procedure for the cycloaddition reaction, aziridinyl enolsilane **1a** (0.3539 g, 1.002 mmol) in EtNO<sub>2</sub> (10 mL) was subjected to reaction with furan (0.36 mL, 5.0 mmol) and TFA (0.37 mL, 5.0 mmol) at  $-90$  °C. After 1 h, aqueous  $\text{NaHCO}_3$  was added and the reaction was

Supplementary Material (ESI) for Chemical Communications  
This journal is (c) The Royal Society of Chemistry 2013

worked up. The crude product was purified by flash column chromatography using 35% EtOAc in hexane to afford cycloadducts  $\alpha$ -4aa and  $\beta$ -4aa (0.3048 g, 99% yield, 55:45).

**Table 1, entry 8:**

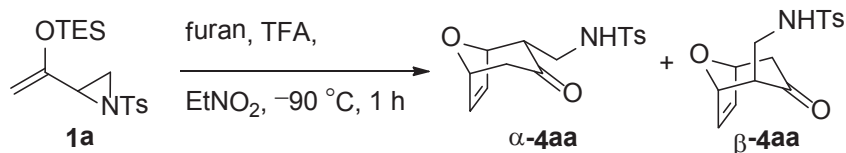

According to the general procedure for the cycloaddition reaction, aziridinylnonsilane **1a** (0.3554 g, 1.006 mmol) in EtNO<sub>2</sub> (10 mL) was subjected to reaction with furan (0.11 mL, 1.5 mmol) and TFA (0.37 mL, 5.0 mmol) at -90 °C. After 1 h, aqueous NaHCO<sub>3</sub> was added and the reaction was worked up. The crude product was purified by flash column chromatography using 35% EtOAc in hexane to afford cycloadducts  $\alpha$ -4aa and  $\beta$ -4aa (0.2583 g, 84% yield, 60:40).

**Table 1, entry 10:**

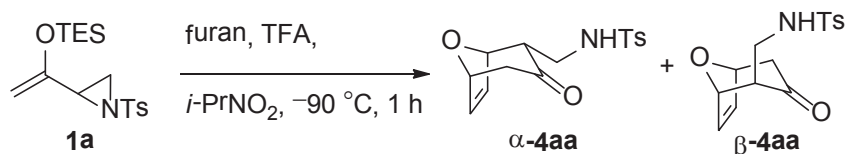

According to the general procedure for the cycloaddition reaction, aziridinylnonsilane **1a** (0.3533 g, 1.000 mmol) in *i*-PrNO<sub>2</sub> (10 mL) was subjected to reaction with furan (0.36 mL, 5.0 mmol) and TFA (0.37 mL, 5.0 mmol) at -90 °C. After 1 h, aqueous NaHCO<sub>3</sub> was added and the reaction was worked up. The crude product was purified by flash column chromatography using 35% EtOAc in hexane to afford cycloadducts  $\alpha$ -4aa and  $\beta$ -4aa (0.3039 g, 99% yield, 50:50).

**Table 1, entry 12:**

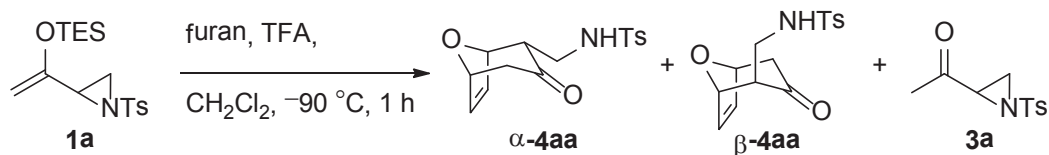

According to the general procedure for the cycloaddition reaction, aziridinylnonsilane **1a** (0.3538 g, 1.001 mmol) in CH<sub>2</sub>Cl<sub>2</sub> (10 mL) was subjected to reaction with furan (0.36 mL, 5.0 mmol) and TFA (0.37 mL, 5.0 mmol) at -90 °C. After 1 h, aqueous NaHCO<sub>3</sub> was added and the reaction was worked up. The crude product was purified by flash column chromatography using 35% EtOAc in hexane to afford cycloadducts  $\alpha$ -4aa and  $\beta$ -4aa (0.0834 g, 27% yield, 52:48) and aziridinylnonsilane ketone **3a** (0.1730 g, 72% yield).

Supplementary Material (ESI) for Chemical Communications  
This journal is (c) The Royal Society of Chemistry 2013

## (4 + 3) Cycloaddition of aziridinyl enolsilanes **1a-g** with dienes (Table 2)

Table 2, entry 1:

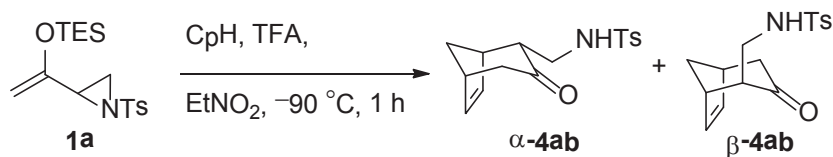

According to the general procedure for the cycloaddition reaction, aziridinyl enolsilane **1a** (0.3538 g, 1.002 mmol) in EtNO<sub>2</sub> (10 mL) was subjected to reaction with freshly cracked cyclopentadiene (0.41 mL, 5.0 mmol) and TFA (0.37 mL, 5.0 mmol) at -90 °C. After 1 h, aqueous NaHCO<sub>3</sub> was added and the reaction was worked up. The crude product was purified by flash column chromatography using 1% acetone in CH<sub>2</sub>Cl<sub>2</sub> to afford cycloadducts  $\alpha$ -**4ab** and  $\beta$ -**4ab** (0.2846g, 93% yield, 54:46).

### 4-Methyl-N-(((1*R*\*,2*R*\*,5*R*\*)-3-oxobicyclo[3.2.1]oct-6-en-2-yl)methyl)benzenesulfonamide

**( $\alpha$ -4ab)**: Colourless oil;  $R_f$  = 0.50 (CH<sub>2</sub>Cl<sub>2</sub>); <sup>1</sup>H NMR (500 MHz, C<sub>6</sub>D<sub>6</sub>)  $\delta$  7.84 (d,  $J$  = 8.3 Hz, 2H), 6.87 (d,  $J$  = 8.4 Hz, 2H), 5.74 (dd,  $J$  = 8.7, 4.4 Hz, 1H), 5.69 (dd,  $J$  = 5.7, 2.6 Hz, 1H), 5.62 (dd,  $J$  = 5.7, 2.6 Hz, 1H), 3.14 (ddd,  $J$  = 12.9, 7.2, 4.5 Hz, 1H), 2.93 (ddd,  $J$  = 12.9, 8.7, 6.5 Hz, 1H), 2.60-2.57 (m, 1H), 2.43-2.39 (m, 1H), 2.31-2.27 (m, 1H), 2.03 (dt,  $J$  = 16.0, 2.7 Hz, 1H), 1.94 (dd,  $J$  = 16.0, 3.4 Hz, 1H), 1.93 (s, 3H), 1.74-1.69 (m, 1H), 1.33 (d,  $J$  = 10.9 Hz, 1H) ppm; <sup>13</sup>C NMR (125 MHz, C<sub>6</sub>D<sub>6</sub>)  $\delta$  210.4, 143.3, 138.6, 137.5, 133.9, 130.2, 127.7, 56.7, 46.0, 43.8, 43.5, 42.7, 39.7, 21.5 ppm; IR (CH<sub>2</sub>Cl<sub>2</sub>) 3339 (NH), 2956, 2877, 1702 (C=O), 1599, 1455 cm<sup>-1</sup>; LRMS (EI, 20 eV)  $m/z$  305 (M<sup>+</sup>, 2), 262 (1), 239 (4), 184 (6), 171 (6), 155 (67), 150 (100), 122 (78); HRMS (EI, 20 eV) Calculated for C<sub>16</sub>H<sub>19</sub>NO<sub>3</sub>S (M<sup>+</sup>) 305.1080, Found 305.1081.

**4-Methyl-N-(((1*S*\*,2*R*\*,5*S*\*)-3-oxobicyclo[3.2.1]oct-6-en-2-yl)methyl)benzenesulfonamide ( $\beta$ -4ab)**: White solid; mp: 118-119 °C;  $R_f$  = 0.31 (CH<sub>2</sub>Cl<sub>2</sub>); <sup>1</sup>H NMR (500 MHz, C<sub>6</sub>D<sub>6</sub>)  $\delta$  7.98 (d,  $J$  = 8.2 Hz, 2H), 6.97 (d,  $J$  = 8.1 Hz, 2H), 5.75-5.73 (m, 2H), 5.54 (dd,  $J$  = 7.2, 4.9 Hz, 1H), 3.24-3.10 (m, 2H), 2.57-2.56 (m, 1H), 2.34-2.31 (m, 2H), 2.13-2.09 (m, 1H), 2.05-2.01 (m, 4H), 1.66-1.61 (m, 1H), 1.50 (d,  $J$  = 11.5 Hz, 1H) ppm; <sup>13</sup>C NMR (125 MHz, C<sub>6</sub>D<sub>6</sub>)  $\delta$  210.9, 143.3, 138.6, 137.2, 136.2, 130.2, 127.8, 54.3, 45.2, 44.9, 40.8, 38.3, 36.9, 21.4 ppm; IR (CH<sub>2</sub>Cl<sub>2</sub>) 3350 (NH), 3045, 2997, 2952, 2879, 1699 (C=O), 1598 cm<sup>-1</sup>; LRMS (EI, 20 eV)  $m/z$  305 (M<sup>+</sup>, 4), 239 (7), 224 (7), 184 (77), 171 (118), 155 (424); HRMS (EI, 20 eV) Calculated for C<sub>16</sub>H<sub>19</sub>NO<sub>3</sub>S (M<sup>+</sup>) 305.1080, Found 305.1075.

Supplementary Material (ESI) for Chemical Communications  
This journal is (c) The Royal Society of Chemistry 2013

**Table 2, entry 2:**

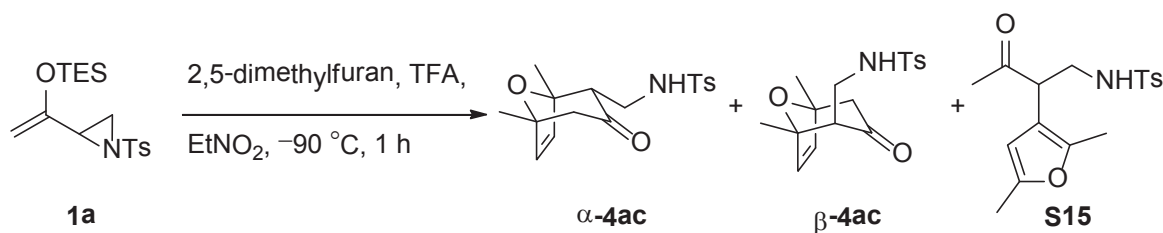

According to the general procedure for the cycloaddition reaction, aziridinyl enolsilane **1a** (0.3541 g, 1.003 mmol) in EtNO<sub>2</sub> (10 mL) was subjected to reaction with 2,5-dimethylfuran (0.53 mL, 5.0 mmol) and TFA (0.37 mL, 5.0 mmol) at -90 °C. After 1 h, aqueous NaHCO<sub>3</sub> was added and the reaction was worked up. The crude product was purified by flash column chromatography using 30% EtOAc in hexane to afford cycloadducts  $\alpha$ -**4ac** and  $\beta$ -**4ac** (0.0847g, 25% yield, 79:21) and alkylation product **S15** (0.0367 g, 11% yield). **N-(((1R\*,2S\*,5R\*)-1,5-Dimethyl-3-oxo-8-oxabicyclo[3.2.1]oct-6-en-2-yl)methyl)-4-methylbenzenesulfonamide ( $\alpha$ -4ac)**: White solid; mp: 128-131 °C; *R<sub>f</sub>* = 0.45 (35% EtOAc in hexane); <sup>1</sup>H NMR (500 MHz, C<sub>6</sub>D<sub>6</sub>)  $\delta$  7.85 (d, *J* = 8.2 Hz, 2H), 6.96 (d, *J* = 8.0 Hz, 2H), 5.88 (d, *J* = 5.8 Hz, 1H), 5.52 (d, *J* = 5.8 Hz, 1H), 5.32 (t, *J* = 6.5 Hz, 1H), 3.26-3.21 (m, 1H), 3.07-3.02 (m, 1H), 2.44 (dd, *J* = 6.7, 3.2 Hz, 1H), 2.21 (d, *J* = 15.2 Hz, 1H), 2.16 (d, *J* = 15.2 Hz, 1H), 2.05 (s, 3H), 1.50 (s, 3H), 1.21 (s, 3H) ppm; <sup>13</sup>C NMR (125 MHz, C<sub>6</sub>D<sub>6</sub>)  $\delta$  207.6, 142.9, 138.7, 136.5, 135.7, 129.8, 127.3, 86.4, 84.0, 61.1, 51.0, 40.0, 23.1, 21.5, 21.0 ppm; IR (CH<sub>2</sub>Cl<sub>2</sub>) 3668 (NH), 3070, 2979, 2934, 1707 (C=O), 1600 cm<sup>-1</sup>; LRMS (EI, 20 eV) *m/z* 335 (M<sup>+</sup>, 4), 239 (11), 180 (100), 162 (13), 155 (14), 153 (12), 138 (46); HRMS (EI, 20 eV) Calculated for C<sub>17</sub>H<sub>21</sub>NO<sub>4</sub>S (M<sup>+</sup>) 335.1186, Found 335.1184. **N-(((1S\*,2S\*,5S\*)-1,5-Dimethyl-3-oxo-8-oxabicyclo[3.2.1]oct-6-en-2-yl)methyl)-4-methylbenzenesulfonamide ( $\beta$ -4ac)**: White solid; mp: 121-124 °C; *R<sub>f</sub>* = 0.33 (35% EtOAc in hexane); <sup>1</sup>H NMR (500 MHz, C<sub>6</sub>D<sub>6</sub>)  $\delta$  7.94 (d, *J* = 8.2 Hz, 2H), 6.91 (d, *J* = 7.9 Hz, 2H), 5.81 (dd, *J* = 7.2, 4.0 Hz, 1H), 5.50 (d, *J* = 5.7 Hz, 1H), 5.46 (d, *J* = 5.7 Hz, 1H), 3.55-3.50 (m, 1H), 3.67-3.31 (m, 1H), 2.41 (d, *J* = 16.2 Hz, 1H), 2.19 (d, *J* = 16.2 Hz, 1H), 2.16 (dd, *J* = 7.6, 4.6 Hz, 1H), 1.98 (s, 3H), 1.14 (s, 3H), 1.03 (s, 3H) ppm; <sup>13</sup>C NMR (125 MHz, C<sub>6</sub>D<sub>6</sub>)  $\delta$  207.5, 143.3, 138.3, 137.7, 136.9, 130.1, 127.9, 85.2, 84.8, 55.9, 50.9, 42.0, 23.0, 21.4, 19.9 ppm; IR (CH<sub>2</sub>Cl<sub>2</sub>) 3328 (NH), 3060, 2981, 1712 (C=O), 1598, 1444 cm<sup>-1</sup>; LRMS (EI, 20 eV): *m/z* 335 (M<sup>+</sup>, 1), 279 (2), 224 (5), 184 (9), 180 (77), 171 (7), 167 (9), 155 (52); HRMS (EI, 20 eV) Calculated for C<sub>17</sub>H<sub>21</sub>NO<sub>4</sub>S (M<sup>+</sup>) 35.1186, Found 335.1191. **N-(2-(2,5-Dimethylfuran-3-yl)-3-oxobutyl)-4-methylbenzenesulfonamide (S15)**: Colourless oil; *R<sub>f</sub>* = 0.62 (35% EtOAc in hexane); <sup>1</sup>H NMR (400 MHz, CDCl<sub>3</sub>)  $\delta$  7.70 (d, *J* = 8.3 Hz, 2H), 7.29 (d, *J* = 8.4 Hz, 2H), 5.54 (s, 1H), 4.84 (t, *J* = 6.7 Hz, 1H), 3.69 (dd, *J* = 8.4, 6.0 Hz, 1H), 3.32-3.25 (m, 1H), 3.03-2.96 (m, 1H), 2.41 (s, 3H), 2.21 (s, 3H), 2.16 (s, 3H), 2.00 (s, 3H) ppm; <sup>13</sup>C NMR (100 MHz, CDCl<sub>3</sub>)  $\delta$  208.0,

Supplementary Material (ESI) for Chemical Communications  
This journal is (c) The Royal Society of Chemistry 2013

150.9, 147.9, 143.5, 137.1, 129.8, 127.1, 114.2, 105.2, 50.2, 43.6, 28.7, 21.6, 13.5, 11.6 ppm; IR (CH<sub>2</sub>Cl<sub>2</sub>): 3060, 2923, 1710 (C=O), 1598, 1583 cm<sup>-1</sup>; LRMS (EI, 20 eV) m/z 335 (M<sup>+</sup>, 3), 183 (1), 164 (8), 155 (19), 152 (100), 137 (21), 136 (18), 122 (11), 121 (15); HRMS (EI, 20 eV) Calculated for C<sub>17</sub>H<sub>21</sub>NO<sub>4</sub>S (M<sup>+</sup>) 335.1186, Found 335.1190.

**Table 2, entry 3:**

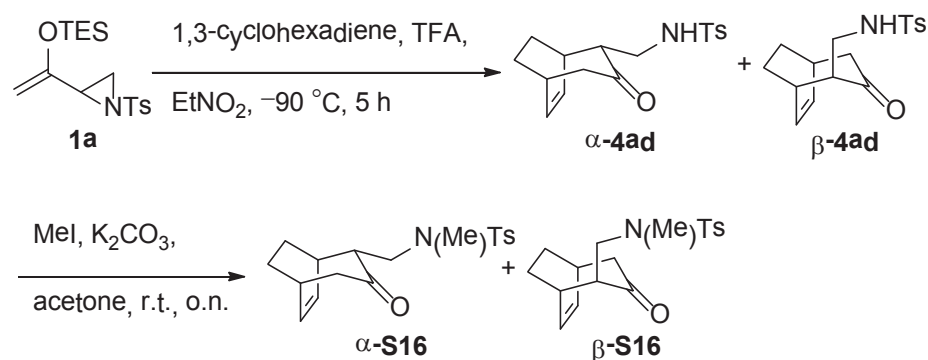

According to the general procedure for the cycloaddition reaction, aziridinyl enolsilane **1a** (0.3543 g, 1.004 mmol) in EtNO<sub>2</sub> (10 mL) was subjected to reaction with 1,3-cyclohexadiene (0.48 mL, 5.0 mmol) and TFA (0.37 mL, 5.0 mmol) at -90 °C. After 5 h, aqueous NaHCO<sub>3</sub> was added and the reaction was worked up. The crude product was purified by flash column chromatography using 20% EtOAc in hexane to afford cycloadducts **α-4ad** and **β-4ad** with some polymer from 1,3-cyclohexadiene. To a solution of this mixture in acetone (10 mL) was added K<sub>2</sub>CO<sub>3</sub> (0.9661 g, 7.001 mmol) and MeI (0.19 mL, 3.0 mmol) at room temperature. The resulting mixture was stirred overnight at room temperature. The reaction mixture was filtered through a short pad of silica gel and washed with Et<sub>2</sub>O. The volatiles were removed *in vacuo*. The residue was purified by flash column chromatography using 10% EtOAc in hexane to afford **α-S16** and **β-S16** (0.2089 g, 63% yield, 41:59). **N,4-Dimethyl-N-(((1R\*,2R\*,5R\*)-3-oxobicyclo[3.2.2]non-6-en-2-yl)methyl)benzenesulfonamide (α-S16)**: Colourless oil; R<sub>f</sub> = 0.38 (20% EtOAc in hexane); <sup>1</sup>H NMR (500 MHz, CDCl<sub>3</sub>) δ 7.63 (d, *J* = 8.2 Hz, 2H), 7.30 (d, *J* = 8.0 Hz, 2H), 6.38-6.32 (m, 2H), 3.25 (dd, *J* = 13.4, 9.9 Hz, 1H), 2.91-2.87 (m, 2H), 2.70-2.67 (m, 5H), 2.58-2.50 (m, 2H), 2.41 (s, 3H), 1.91-1.76 (m, 4H) ppm; <sup>13</sup>C NMR (125 MHz, C<sub>6</sub>D<sub>6</sub>) δ 211.9, 143.4, 135.7, 134.0, 132.6, 129.7, 127.4, 58.1, 51.3, 49.1, 35.3, 30.7, 29.1, 26.4, 26.1, 21.4 ppm; IR (CH<sub>2</sub>Cl<sub>2</sub>) 3055, 2939, 2869, 1689 (C=O), 1458, 1342 cm<sup>-1</sup>; LRMS (EI, 20 eV) m/z 333 (M<sup>+</sup>, 1), 253 (1), 198(73), 185 (13), 178 (41); HRMS (EI, 20 eV) Calculated for C<sub>18</sub>H<sub>23</sub>NO<sub>3</sub>S (M<sup>+</sup>) 333.1393, Found 333.1388. **N,4-Dimethyl-N-(((1S\*,2R\*,5S\*)-3-oxobicyclo[3.2.2]non-6-en-2-yl)methyl)benzenesulfonamide (β-S16)**: Colourless oil; R<sub>f</sub> (20% EtOAc in hexane) 0.47; <sup>1</sup>H NMR (500 MHz, CDCl<sub>3</sub>) δ 7.66 (d, *J* =

Supplementary Material (ESI) for Chemical Communications  
This journal is (c) The Royal Society of Chemistry 2013

8.2 Hz, 2H), 7.32 (d,  $J = 8.0$  Hz, 2H), 6.45-6.41 (m, 2H), 3.41 (dd,  $J = 14.0, 10.6$  Hz, 1H), 3.00 (dd,  $J = 14.0, 4.0$  Hz, 1H), 2.87 (br s, 1H), 2.67 (s, 3H), 2.63-2.55 (m, 3H), 2.42-2.39 (m, 4H), 1.78-1.59 (m, 4H) ppm;  $^{13}\text{C}$  NMR (125 MHz,  $\text{C}_6\text{D}_6$ )  $\delta$  211.6, 143.4, 136.0, 135.4, 134.0, 129.7, 127.4, 55.1, 50.0, 49.2, 35.7, 29.9, 29.0, 24.7, 21.4, 20.4 ppm; IR ( $\text{CH}_2\text{Cl}_2$ ) 3055, 2931, 2869, 1689 (C=O), 1596, 1458  $\text{cm}^{-1}$ ; LRMS (EI, 20 eV)  $m/z$  333 ( $\text{M}^+$ , 1), 295 (1), 253 (1), 241 (1), 198 (24), 185 (12), 178 (12), 155 (39), 120 (9); HRMS (EI, 20 eV) Calculated for  $\text{C}_{18}\text{H}_{23}\text{NO}_3\text{S}$  ( $\text{M}^+$ ) 333.1393, Found 333.1382.

**Table 2, entry 4:**

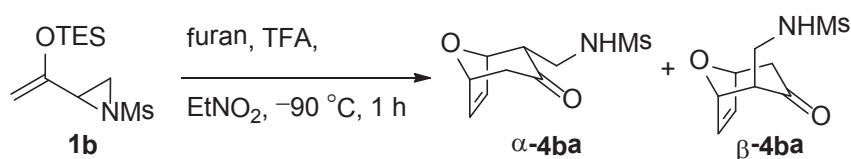

According to the general procedure for the cycloaddition reaction, aziridinyl enolsilane **1b** (0.2781 g, 1.004 mmol) in  $\text{EtNO}_2$  (10 mL) was subjected to reaction with furan (0.36 mL, 5.0 mmol) and TFA (0.37 mL, 5.0 mmol) at  $-90^\circ\text{C}$ . After 1 h, aqueous  $\text{NaHCO}_3$  was added and the reaction was worked up. The crude product was purified by flash column chromatography using 75%  $\text{EtOAc}$  in hexane to afford cycloadducts  $\alpha$ -**4ba** and  $\beta$ -**4ba** (0.2183 g, 94% yield, 52:48).

**N-(((1R\*,2S\*,5R\*)-3-Oxo-8-oxabicyclo[3.2.1]oct-6-en-2-yl)methyl)methanesulfonamide ( $\alpha$ -4ba):** White solid; mp: 108-111  $^\circ\text{C}$ ;  $R_f = 0.39$  (70%  $\text{EtOAc}$  in hexane);  $^1\text{H}$  NMR (500 MHz,  $\text{CD}_3\text{OD}$ )  $\delta$  6.38 (dd,  $J = 6.1, 1.6$  Hz, 1H), 6.36 (dd,  $J = 6.1, 1.6$  Hz, 1H), 5.08 (dd,  $J = 4.5, 1.5$  Hz, 1H), 5.01 (dt,  $J = 5.0, 1.2$  Hz, 1H), 3.44 (dd,  $J = 13.6, 5.0$  Hz, 1H), 3.00-2.97 (m, 1H), 2.91 (dd,  $J = 13.6, 8.7$  Hz, 1H), 2.75 (dd,  $J = 15.7, 5.0$  Hz, 1H), 2.25 (dd,  $J = 15.7, 0.7$  Hz, 1H) ppm;  $^{13}\text{C}$  NMR (125 MHz,  $\text{C}_6\text{D}_6$ )  $\delta$  207.7, 136.1, 132.8, 80.4, 79.5, 58.4, 46.4, 40.6, 39.7 ppm; IR ( $\text{CH}_2\text{Cl}_2$ ): 3352 (NH), 3058, 2968, 1708 (C=O), 1423, 1406  $\text{cm}^{-1}$ ; LRMS (EI, 20 eV)  $m/z$  231 ( $\text{M}^+$ , 2), 163 (11), 150 (35), 136 (60), 108 (24), 95 (23), 81 (100); HRMS (EI, 20 eV) Calculated for  $\text{C}_9\text{H}_{13}\text{NO}_4\text{S}$  ( $\text{M}^+$ ) 231.0560, Found 231.0554.

**N-(((1S\*,2S\*,5S\*)-3-Oxo-8-oxabicyclo[3.2.1]oct-6-en-2-yl)methyl)methanesulfonamide ( $\beta$ -4ba):** White solid; mp: 136-138  $^\circ\text{C}$ ;  $R_f = 0.26$  (70%  $\text{EtOAc}$  in hexane);  $^1\text{H}$  NMR (500 MHz,  $\text{CD}_3\text{OD}$ )  $\delta$  6.35 (dd,  $J = 6.0, 1.6$  Hz, 1H), 6.31 (dd,  $J = 6.0, 1.7$  Hz, 1H), 4.98 (d,  $J = 5.1$  Hz, 1H), 4.93 (s, 1H), 4.48 (dd,  $J = 13.3, 8.4$  Hz, 1H), 3.37 (dd,  $J = 13.3, 7.0$  Hz, 1H), 2.94 (s, 3H), 2.80 (dd,  $J = 16.6, 5.1$  Hz, 1H), 2.43 (t,  $J = 8.0$  Hz, 1H), 2.26 (d,  $J = 16.6$  Hz, 1H) ppm;  $^{13}\text{C}$  NMR (125 MHz,  $\text{C}_6\text{D}_6$ )  $\delta$  208.4, 135.6, 133.9, 79.8, 78.9, 57.9, 46.2, 43.9, 40.2 ppm; IR ( $\text{CH}_2\text{Cl}_2$ ) 3375 (NH), 3066, 3051, 2966, 1714 (C=O), 1425, 1407  $\text{cm}^{-1}$ ; LRMS (EI, 20 eV)  $m/z$  231 ( $\text{M}^+$ , 1), 163 (6), 150 (31), 148 (11),

Supplementary Material (ESI) for Chemical Communications  
This journal is (c) The Royal Society of Chemistry 2013

136 (45), 124 (17), 108 (20); HRMS (EI, 20 eV) Calculated for C<sub>9</sub>H<sub>13</sub>NO<sub>4</sub>S (M<sup>+</sup>) 231.0560, Found 231.0564.

**Table 2, entry 5:**

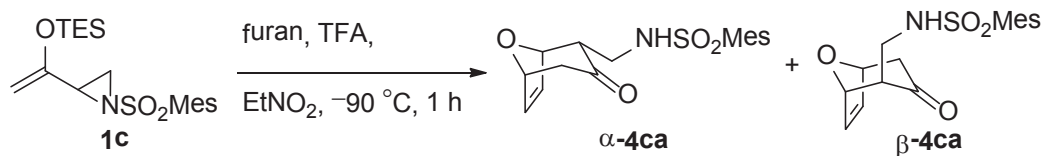

According to the general procedure for the cycloaddition reaction, aziridinyl enolsilane **1c** (0.3816 g, 1.002 mmol) in EtNO<sub>2</sub> (10 mL) was subjected to reaction with furan (0.36 mL, 5.0 mmol) and TFA (0.37 mL, 5.0 mmol) at -90 °C. After 1 h, aqueous NaHCO<sub>3</sub> was added and the reaction was worked up. The crude product was purified by flash column chromatography using 30% EtOAc in hexane to afford cycloadducts  $\alpha$ -**4ca** and  $\beta$ -**4ca** (0.3781 g, 85% yield, 57:43).

**2,4,6-Trimethyl-N-(((1*R*\*,2*S*\*,5*R*\*)-3-oxo-8-oxabicyclo[3.2.1]oct-6-en-2-yl)methyl)-**

**benzenesulfonamide ( $\alpha$ -**4ca**):** White solid; mp: 125-127 °C;  $R_f$  = 0.34 (35% EtOAc in hexane); <sup>1</sup>H NMR (500 MHz, CDCl<sub>3</sub>)  $\delta$  6.95 (s, 2H), 6.25 (dd,  $J$  = 6.1, 1.6 Hz, 1H), 6.21 (dd,  $J$  = 6.1, 1.6 Hz, 1H), 5.35 (dd,  $J$  = 7.7, 5.7 Hz, 1H), 5.00 (d,  $J$  = 5.0 Hz, 1H), 4.94 (dd,  $J$  = 4.4, 1.6 Hz, 1H), 2.96-2.93 (m, 1H), 2.91-2.84 (m, 2H), 2.72 (dd,  $J$  = 15.6, 5.0 Hz, 1H), 2.63 (s, 6H), 2.61-2.25 (m, 4H) ppm; <sup>13</sup>C NMR (125 MHz, CDCl<sub>3</sub>)  $\delta$  207.3, 142.2, 138.8, 134.5, 133.3, 132.0, 131.8, 79.5, 77.8, 56.6, 45.5, 39.4, 22.7, 20.8 ppm; IR (CH<sub>2</sub>Cl<sub>2</sub>) 3633 (NH), 3062, 2970, 1705 (C=O), 1566, 1404 cm<sup>-1</sup>; LRMS (EI, 20 eV)  $m/z$  335 (M<sup>+</sup>, 1), 267 (6), 199 (16), 183 (18), 165 (10), 152 (18), 149 (13); HRMS (EI, 20 eV) Calculated for C<sub>17</sub>H<sub>21</sub>NO<sub>4</sub>S (M<sup>+</sup>) 335.1186, Found 335.1194.

**2,4,6-Trimethyl-N-(((1*S*\*,2*S*\*,5*S*\*)-3-oxo-8-oxabicyclo[3.2.1]oct-6-en-2-yl)methyl)benzene-**

**sulfonamide ( $\beta$ -**4ca**):** White solid; mp: 188-191 °C;  $R_f$  = 0.26 (35% EtOAc in hexane); <sup>1</sup>H NMR (500 MHz, CDCl<sub>3</sub>)  $\delta$  6.95 (s, 2H), 6.29 (dd,  $J$  = 6.0, 1.5 Hz, 1H), 6.21 (dd,  $J$  = 6.0, 1.7 Hz, 1H), 5.27 (dd,  $J$  = 8.1, 3.6 Hz, 1H), 4.99 (d,  $J$  = 5.4 Hz, 1H), 4.82 (d,  $J$  = 1.5 Hz, 1H), 3.35-3.29 (m, 1H), 3.16-3.11 (m, 1H), 2.67-2.63 (m, 1H), 2.62 (s, 6H), 2.37 (t,  $J$  = 6.7 Hz, 1H), 2.30-2.26 (m, 4H) ppm; <sup>13</sup>C NMR (125 MHz, CDCl<sub>3</sub>)  $\delta$  206.4, 142.4, 139.2, 134.5, 132.9, 132.7, 132.0, 79.4, 77.2, 54.3, 45.1, 43.2, 22.9, 20.9 ppm; IR (CH<sub>2</sub>Cl<sub>2</sub>) 3381 (NH), 3057, 2989, 2941, 1716 (C=O), 1458 cm<sup>-1</sup>; LRMS (EI, 20 eV)  $m/z$  335 (M<sup>+</sup>, 3), 267 (2), 212 (19), 183 (37), 153 (19), 136 (39); HRMS (EI, 20 eV) Calculated for C<sub>17</sub>H<sub>21</sub>NO<sub>4</sub>S (M<sup>+</sup>) 335.1186, Found 335.1185.

Supplementary Material (ESI) for Chemical Communications  
This journal is (c) The Royal Society of Chemistry 2013

**Table 2, entry 6:**

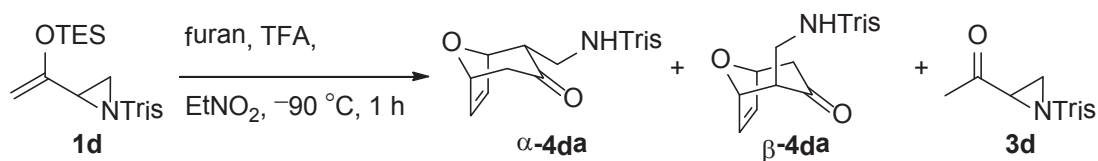

According to the general procedure for the cycloaddition reaction, aziridinyl enolsilane **1d** (0.4498 g, 0.9673 mmol) in EtNO<sub>2</sub> (10 mL) was subjected to reaction with furan (0.36 mL, 5.0 mmol) and TFA (0.37 mL, 5.0 mmol) at -90 °C. After 1 h, aqueous NaHCO<sub>3</sub> was added and the reaction was worked up. The crude product was purified by flash column chromatography using 25% EtOAc in hexane to afford cycloadducts  $\alpha$ -**4da** and  $\beta$ -**4da** (0.3405 g, 84% yield, 57:43) and aziridinyl ketone **3d** (0.0493 g, 15% yield). **2,4,6-Triisopropyl-N-(((1R\*,2S\*,5R\*)-3-oxo-8-oxabicyclo[3.2.1]oct-6-en-2-yl)methyl)benzenesulfonamide ( $\alpha$ -4da)**: White solid; mp: 129-132 °C;  $R_f$  = 0.51 (35% EtOAc in hexane); <sup>1</sup>H NMR (500 MHz, C<sub>6</sub>D<sub>6</sub>)  $\delta$  7.21 (s, 2H), 5.67 (dd,  $J$  = 6.0, 1.6 Hz, 1H), 5.45 (dd,  $J$  = 6.0, 1.6 Hz, 1H), 5.32 (dd,  $J$  = 8.3, 5.1 Hz, 1H), 4.51 (septet,  $J$  = 6.7 Hz, 2H), 4.46 (dd,  $J$  = 4.5, 1.5 Hz, 1H), 4.31 (d,  $J$  = 5.0 Hz, 1H), 2.96-2.84 (m, 2H), 2.66-2.58 (m, 2H), 2.10 (dd,  $J$  = 15.5, 5.0 Hz, 1H), 1.73 (d,  $J$  = 15.5 Hz, 1H), 1.37 (d,  $J$  = 6.7 Hz, 6H), 1.36 (d,  $J$  = 6.7 Hz, 6H), 1.09 (d,  $J$  = 6.9 Hz, 6H) ppm; <sup>13</sup>C NMR (125 MHz, C<sub>6</sub>D<sub>6</sub>)  $\delta$  207.0, 153.1, 151.0, 134.7, 134.4, 132.2, 124.4, 80.0, 78.1, 57.3, 45.8, 40.6, 34.7, 30.5, 25.5, 24.0 ppm; IR (CH<sub>2</sub>Cl<sub>2</sub>) 3685 (NH), 2964, 2929, 2869, 1708 (C=O), 1600, 1564 cm<sup>-1</sup>; LRMS (EI, 20 eV)  $m/z$  419 (M<sup>+</sup>, 1), 282 (3), 267 (37), 266 (18), 251 (35), 232 (2); HRMS (EI, 20 eV) Calculated for C<sub>23</sub>H<sub>33</sub>NO<sub>4</sub>S (M<sup>+</sup>) 419.2125, Found 419.2123. **2,4,6-Triisopropyl-N-(((1S\*,2S\*,5S\*)-3-oxo-8-oxabicyclo[3.2.1]oct-6-en-2-yl)methyl)benzenesulfonamide ( $\beta$ -4da)**: White solid; mp: 175-178 °C;  $R_f$  = 0.50 (35% EtOAc in hexane); <sup>1</sup>H NMR (500 MHz, CDCl<sub>3</sub>)  $\delta$  7.15 (s, 2H), 6.31 (dd,  $J$  = 6.0, 1.5 Hz, 1H), 6.23 (dd,  $J$  = 6.0, 1.7 Hz, 1H), 5.17 (dd,  $J$  = 8.5, 3.4 Hz, 1H), 5.01 (d,  $J$  = 5.5 Hz, 1H), 4.88 (d,  $J$  = 1.5 Hz, 1H), 4.11 (septet,  $J$  = 6.7 Hz, 2H), 3.42-3.36 (m, 1H), 3.26-3.22 (m, 1H), 2.89 (septet,  $J$  = 6.9 Hz, 1H), 2.72 (dd,  $J$  = 17.0, 4.9 Hz, 1H), 2.44 (t,  $J$  = 6.5 Hz, 1H), 2.32 (d,  $J$  = 17.0 Hz, 1H), 1.26-1.24 (m, 18H) ppm; <sup>13</sup>C NMR (125 MHz, CDCl<sub>3</sub>)  $\delta$  206.3, 152.9, 150.4, 134.6, 132.7, 131.6, 123.8, 79.5, 77.3, 54.3, 45.3, 43.4, 34.1, 29.6, 24.9, 24.8, 23.5 ppm; IR (CH<sub>2</sub>Cl<sub>2</sub>) 3685 (NH), 2964, 2929, 2869, 1714 (C=O), 1600 cm<sup>-1</sup>; LRMS (EI, 20 eV)  $m/z$  419 (M<sup>+</sup>, 1), 267 (83), 251 (36), 216 (26), 187 (100), 161 (15), 159 (51), 117 (31), 91 (35), 85 (40); HRMS (EI, 20 eV) Calculated for C<sub>8</sub>H<sub>10</sub>NO<sub>4</sub>S (M<sup>+</sup>) 419.2125; Found 419.2124.



Supplementary Material (ESI) for Chemical Communications  
This journal is (c) The Royal Society of Chemistry 2013

**Table 2, entry 7:**

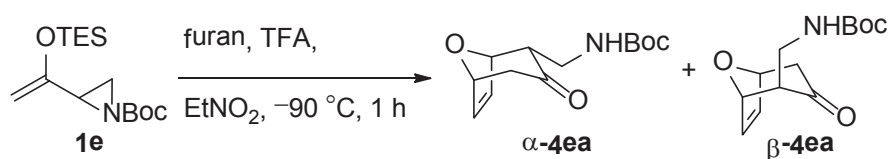

According to the general procedure for the cycloaddition reaction, aziridinyl enolsilane **1e** (0.1499 g, 0.5005 mmol) in EtNO<sub>2</sub> (5.0 mL) was subjected to reaction with furan (0.180 mL, 2.47 mmol) and TFA (0.045 mL, 0.59 mmol) at -90 °C. After 1 h, aqueous NaHCO<sub>3</sub> was added and the reaction was worked up. The crude product was purified by flash column chromatography using 25% EtOAc in hexane to afford cycloadducts **α-4ea** and **β-4ea** (0.0674 g, 53% yield, 53:47). **tert-Butyl (((1*R*\*,2*S*\*,5*R*\*)-3-oxo-8-oxabicyclo[3.2.1]oct-6-en-2-yl)methyl)carbamate (α-4ea)**: White solid; mp: 92-95 °C; *R<sub>f</sub>* = 0.59 (50% EtOAc in hexane); <sup>1</sup>H NMR (500 MHz, CDCl<sub>3</sub>) δ 6.28 (d, *J* = 6.2, 1.2 Hz, 1H), 6.25 (dd, *J* = 6.1, 1.1 Hz, 1H), 5.03-5.02 (m, 1H), 4.99-4.97 (m, 2H), 3.35-3.29 (m, 1H), 3.21-3.16 (m, 1H), 2.90 (ddd, *J* = 6.1, 4.9, 4.9 Hz, 1H), 2.74 (dd, *J* = 15.6, 4.9 Hz, 1H), 2.29 (d, *J* = 15.6 Hz, 1H), 1.43 (s, 9H) ppm; <sup>13</sup>C NMR (125 MHz, CDCl<sub>3</sub>) δ 207.2, 156.0, 134.4, 132.2, 79.9, 79.5, 77.6, 58.2, 45.6, 37.0, 28.4 ppm; IR (CH<sub>2</sub>Cl<sub>2</sub>) 3451 (NH), 3067, 3044, 2992, 2980, 1711 (C=O), 1506, 1368, 1269, 1171 cm<sup>-1</sup>; LRMS (EI, 20 eV) *m/z* 253 (M<sup>+</sup>, 1), 197 (5), 185 (18), 153 (30), 137 (39), 129 (59), 124 (100), 107 (23), 95 (28), 85 (44), 81 (46), 70 (39); HRMS (EI, 20 eV) Calculated for C<sub>13</sub>H<sub>19</sub>NO<sub>4</sub> (M<sup>+</sup>) 253.1314, Found 253.1299. **tert-Butyl (((1*S*\*,2*S*\*,5*S*\*)-3-oxo-8-oxabicyclo[3.2.1]oct-6-en-2-yl)methyl)carbamate (β-4ea)**: White solid; mp: 91-94 °C; *R<sub>f</sub>* = 0.46 (50% EtOAc in hexane); <sup>1</sup>H NMR (500 MHz, CDCl<sub>3</sub>) δ 6.30 (dd, *J* = 6.0, 1.5 Hz, 1H), 6.26 (dd, *J* = 6.0, 1.8 Hz, 1H), 5.02-5.01 (m, 1H), 4.83-4.81 (m, 2H), 3.58-3.48 (m, 2H), 2.85 (dd, *J* = 16.7, 4.7 Hz, 1H), 2.41 (dd, *J* = 7.4, 7.4 Hz, 1H), 2.29 (d, *J* = 16.7 Hz, 1H), 1.43 (s, 9H) ppm; <sup>13</sup>C NMR (125 MHz, CDCl<sub>3</sub>) δ 206.8, 155.8, 134.3, 132.9, 79.7, 79.4, 78.1, 56.0, 45.1, 41.2, 28.4 ppm; IR (CH<sub>2</sub>Cl<sub>2</sub>) 3347 (NH), 3069, 3044, 2992, 2980, 1713 (C=O), 1506, 1368, 1337, 1244, 1167 cm<sup>-1</sup>; LRMS (EI, 20 eV) *m/z* 253 (M<sup>+</sup>, 1), 197 (8), 180 (7), 153 (20), 137 (37), 124 (87), 95 (100), 81 (50), 70 (21); HRMS (EI, 20 eV) Calculated for C<sub>13</sub>H<sub>19</sub>NO<sub>4</sub> (M<sup>+</sup>) 253.1314, Found 253.1311.

**Table 2, entry 8:**

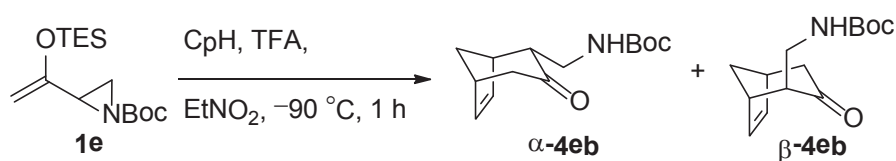

According to the general procedure for the cycloaddition reaction, aziridinyl enolsilane **1e** (0.1497 g, 0.4987 mmol) in EtNO<sub>2</sub> (5.0 mL) was subjected to reaction with freshly cracked cyclopentadiene

Supplementary Material (ESI) for Chemical Communications  
This journal is (c) The Royal Society of Chemistry 2013

(0.210 mL, 2.54 mmol) and TFA (0.045 mL, 0.59 mmol) at  $-90\text{ }^{\circ}\text{C}$ . After 1 h, aqueous  $\text{NaHCO}_3$  was added and the reaction was worked up. The crude product was purified by flash column chromatography using 20% EtOAc in hexane to afford cycloadducts  $\alpha$ -**4eb** and  $\beta$ -**4eb** (0.0938 g, 75% yield, 59:41). Analytically pure samples of  $\alpha$ -**4eb** and  $\beta$ -**4eb** were obtained by further careful column chromatography using 1% acetone in  $\text{CH}_2\text{Cl}_2$ . **tert-Butyl (((1*R*\*,2*R*\*,5*R*\*)-3-oxobicyclo[3.2.1]oct-6-en-2-yl)methyl)carbamate ( $\alpha$ -**4eb**):** Colourless oil;  $R_f = 0.63$  (30% EtOAc in hexane);  $^1\text{H NMR}$  (500 MHz,  $\text{CDCl}_3$ )  $\delta$  6.04 (dd,  $J = 5.7, 2.7$  Hz, 1H), 5.96 (dd,  $J = 5.8, 2.7$  Hz, 1H), 5.15 (br s, 1H), 3.29 (ddd,  $J = 13.8, 8.1, 4.3$  Hz, 1H), 3.12 (ddd,  $J = 13.6, 7.9, 4.6$  Hz, 1H), 2.91-2.84 (m, 2H), 2.62-2.59 (m, 1H), 2.43 (dd,  $J = 15.9, 3.3$  Hz, 1H), 2.29 (ddd,  $J = 15.9, 2.8, 2.8$  Hz, 1H), 2.16-2.10 (m, 1H), 1.86 (d,  $J = 11.0$  Hz, 1H), 1.42 (s, 9H) ppm;  $^{13}\text{C NMR}$  (125 MHz,  $\text{CDCl}_3$ )  $\delta$  211.8, 156.0, 136.9, 133.7, 79.1, 57.3, 45.9, 43.6, 43.2, 40.5, 39.4, 28.4 ppm; IR ( $\text{CH}_2\text{Cl}_2$ ) 3451 (NH), 3067, 3044, 2992, 2980, 1705 (C=O), 1504, 1456, 1368, 1269, 1242, 1171  $\text{cm}^{-1}$ ; LRMS (EI, 20 eV)  $m/z$  251 ( $\text{M}^+$ , 2), 195 (21), 178 (6), 134 (27), 129 (34), 122 (100), 107 (28), 91 (23), 79 (36), 77 (31); HRMS (EI, 20 eV) Calculated for  $\text{C}_{14}\text{H}_{21}\text{NO}_3$  ( $\text{M}^+$ ) 251.1521, Found 251.1518. **tert-Butyl (((1*S*\*,2*R*\*,5*S*\*)-3-oxobicyclo[3.2.1]oct-6-en-2-yl)methyl)carbamate ( $\beta$ -**4eb**):** White solid; mp: 80-83  $^{\circ}\text{C}$ ;  $R_f = 0.54$  (50% EtOAc in hexane);  $^1\text{H NMR}$  (500 MHz,  $\text{CDCl}_3$ )  $\delta$  6.07 (dd,  $J = 5.7, 2.7$  Hz, 1H), 6.03 (dd,  $J = 5.7, 2.9$  Hz, 1H), 4.83 (br s, 1H), 3.42-3.30 (m, 2H), 2.86-2.83 (m, 1H), 2.77-2.76 (m, 1H), 2.49 (dd,  $J = 17.7, 3.0$  Hz, 1H), 2.34-2.28 (m, 2H), 1.96-1.91 (m, 2H), 1.42 (s, 9H) ppm;  $^{13}\text{C NMR}$  (125 MHz,  $\text{CDCl}_3$ )  $\delta$  212.2, 155.9, 136.9, 135.8, 79.5, 54.8, 45.0, 42.0, 41.2, 38.0, 36.9, 28.4 ppm; IR ( $\text{CH}_2\text{Cl}_2$ ) 3447 (NH), 3069, 3044, 2992, 2980, 1707 (C=O), 1504, 1368, 1242, 1169  $\text{cm}^{-1}$ ; LRMS (EI, 20 eV)  $m/z$  251 ( $\text{M}^+$ , 6), 195 (42), 178 (8), 151 (17), 134 (41), 129 (100), 122 (69), 107 (18), 91 (32), 79 (34), 70 (28); HRMS (EI, 20 eV) Calculated for  $\text{C}_{14}\text{H}_{21}\text{NO}_3$  ( $\text{M}^+$ ) 251.1521, Found 251.1519.

**Table 2, entry 9:**

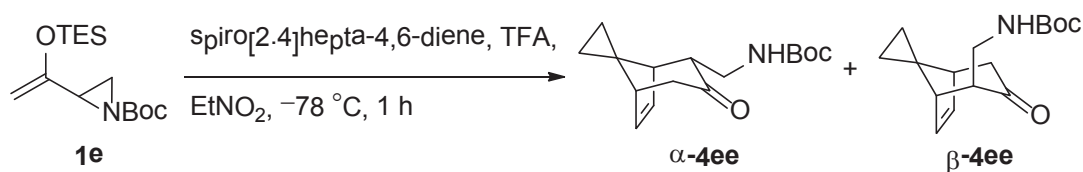

According to the general procedure for the cycloaddition reaction, aziridiny enolsilane **1e** (0.1090 g, 0.3640 mmol) in  $\text{EtNO}_2$  (3.6 mL) was subjected to reaction with spiro[2,4]hepta-4,6-diene (0.185 mL, 1.85 mmol) and TFA (0.035 mL, 0.46 mmol) at  $-90\text{ }^{\circ}\text{C}$ . After 1 h, aqueous  $\text{NaHCO}_3$  was added and the reaction was worked up. The crude product was purified by flash column chromatography using 20% EtOAc in hexane to afford cycloadducts  $\alpha$ -**4ee** and  $\beta$ -**4ee** (0.0701 g, 69% yield, 83:17). **tert-Butyl (((1*R*\*,2*R*\*,5*R*\*)-3-oxospiro[bicyclo[3.2.1]oct[6]ene-8,1'-cyclopropan]-**

Supplementary Material (ESI) for Chemical Communications  
This journal is (c) The Royal Society of Chemistry 2013

**2-yl)methyl)carbamate ( $\alpha$ -4ee):** White solid; mp: 138-141 °C;  $R_f$  = 0.49 (20% EtOAc in hexane);  $^1\text{H}$  NMR (500 MHz,  $\text{CDCl}_3$ )  $\delta$  6.16 (dd,  $J$  = 5.9, 2.7 Hz, 1H), 6.08 (dd,  $J$  = 5.9, 2.7 Hz, 1H), 5.16 (br s, 1H), 3.29 (ddd,  $J$  = 12.9, 8.0, 4.2 Hz, 1H), 3.13 (ddd,  $J$  = 12.8, 7.5, 4.6 Hz, 1H), 2.66 (ddd,  $J$  = 7.6, 3.5, 3.5 Hz, 1H), 2.50 (dd,  $J$  = 15.7, 3.4 Hz, 1H), 2.33 (dd,  $J$  = 15.7, 2.7 Hz, 1H), 2.16-2.14 (m, 2H), 1.42 (s, 9H), 0.74-0.64 (m, 4H) ppm;  $^{13}\text{C}$  NMR (125 MHz,  $\text{CDCl}_3$ )  $\delta$  212.0, 156.0, 137.3, 134.7, 79.1, 57.0, 49.9, 46.1, 45.4, 40.1, 36.8, 28.4, 13.7, 7.7 ppm; IR ( $\text{CH}_2\text{Cl}_2$ ) 3449 (NH), 3068, 2980, 2934, 1705 (C=O), 1506, 1368, 1244, 1167  $\text{cm}^{-1}$ ; LRMS (EI, 20 eV)  $m/z$  277 ( $\text{M}^+$ , 3), 221 (24), 177 (16), 160 (58), 129 (43), 120 (58), 104 (54), 91 (100), 85 (75), 70 (77); HRMS (EI, 20 eV) Calculated for  $\text{C}_{16}\text{H}_{23}\text{NO}_3$  ( $\text{M}^+$ ) 277.1678, Found 277.1670. ***tert*-Butyl (((1*S*\*,2*R*\*,5*S*\*)-3-oxospiro[bicyclo[3.2.1]oct[6]ene-8,1'-cyclopropan]-2-yl)methyl)carbamate ( $\beta$ -4ee):** Colourless oil;  $R_f$  = 0.43 (20% EtOAc in hexane);  $^1\text{H}$  NMR (600 MHz,  $\text{CDCl}_3$ )  $\delta$  6.19-6.17 (m, 2H), 4.85 (br s, 1H), 3.45 (ddd,  $J$  = 13.5, 9.5, 4.2 Hz, 1H), 3.39 (ddd,  $J$  = 13.2, 11.0, 4.8 Hz, 1H), 2.65 (dd,  $J$  = 17.2, 3.2 Hz, 1H), 2.40-2.36 (m, 2H), 2.19 (s, 1H), 2.09 (s, 1H), 1.42 (s, 9H), 1.02-0.98 (m, 1H), 0.80-0.76 (m, 1H), 0.51-0.48 (m, 2H) ppm;  $^{13}\text{C}$  NMR (125 MHz,  $\text{CDCl}_3$ )  $\delta$  212.5, 155.8, 137.0, 136.8, 79.7, 56.1, 47.8, 45.6, 44.3, 41.1, 32.1, 28.4, 10.9, 8.1 ppm; IR ( $\text{CH}_2\text{Cl}_2$ ) 3445 (NH), 3067, 2992, 2980, 1705 (C=O), 1506, 1244, 1169  $\text{cm}^{-1}$ ; LRMS (EI, 20 eV)  $m/z$  221 (52), 220 ( $\text{M}^+ - \text{C}_4\text{H}_9$ , 5), 206 (7), 178 (30), 160 (38), 148 (30), 134 (52), 117 (69), 105 (50), 92 (100), 91 (51), 77 (27); HRMS (EI, 20 eV) Calculated for  $\text{C}_{12}\text{H}_{14}\text{NO}_3$  ( $\text{M}^+ - \text{C}_4\text{H}_9$ ) 220.0974, Found 220.0966.

**Table 2, entry 10:**

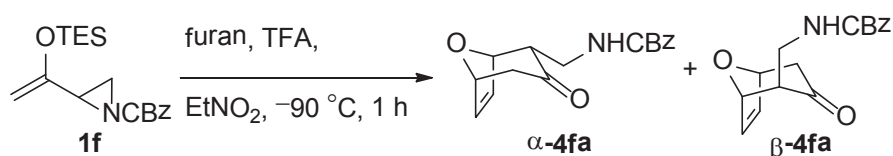

According to the general procedure for the cycloaddition reaction, aziridinyl enolsilane **1f** (0.0723 g, 0.217 mmol) in  $\text{EtNO}_2$  (2.2 mL) was subjected to reaction with furan (0.080 mL, 1.10 mmol) and TFA (0.020 mL, 0.26 mmol) at  $-90\text{ }^\circ\text{C}$ . After 1 h, aqueous  $\text{NaHCO}_3$  was added and the reaction was worked up. The crude product was purified by flash column chromatography using 25% EtOAc in hexane to afford cycloadducts  $\alpha$ -4fa and  $\beta$ -4fa (0.0393 g, 54% yield, 51:49). **Benzyl (((1*R*\*,2*S*\*,5*R*\*)-3-oxo-8-oxabicyclo[3.2.1]oct-6-en-2-yl)methyl)carbamate ( $\alpha$ -4fa):** Colourless oil;  $R_f$  = 0.56 (50% EtOAc in hexane);  $^1\text{H}$  NMR (500 MHz,  $\text{CDCl}_3$ )  $\delta$  7.37-7.30 (m, 5H), 6.27 (dd,  $J$  = 6.0, 1.7 Hz, 1H), 6.02 (dd,  $J$  = 6.0, 1.1 Hz, 1H), 5.26 (br s, 1H), 5.11 (d,  $J$  = 12.3 Hz, 1H), 5.08 (d,  $J$  = 12.3 Hz, 1H), 5.02 (ddd,  $J$  = 5.0, 1.1, 1.1 Hz, 1H), 4.98 (dd,  $J$  = 4.1, 1.1 Hz, 1H), 3.40 (ddd,  $J$  = 13.8, 7.7, 5.3 Hz, 1H), 3.24 (ddd,  $J$  = 13.8, 6.3, 5.5 Hz, 1H), 2.94-2.91 (m, 1H), 2.74 (dd,  $J$  = 15.6, 5.0 Hz, 1H), 2.29

Supplementary Material (ESI) for Chemical Communications  
This journal is (c) The Royal Society of Chemistry 2013

(dd,  $J = 15.6, 0.5$  Hz, 1H) ppm;  $^{13}\text{C}$  NMR (125 MHz,  $\text{CDCl}_3$ )  $\delta$  207.2, 156.4, 136.5, 134.6, 132.0, 128.6, 128.2, 128.1, 79.8, 78.0, 66.8, 57.9, 45.6, 37.6 ppm; IR ( $\text{CH}_2\text{Cl}_2$ ) 3445 (NH), 3069, 3044, 2992, 2967, 1719 (C=O), 1512, 1244, 1225  $\text{cm}^{-1}$ ; LRMS (EI, 20 eV)  $m/z$  287 ( $\text{M}^+$ , 1), 219 (9), 176 (4), 136 (9), 107 (16), 91 (100), 81 (22), 79 (13), 70 (11); HRMS (EI, 20 eV) Calculated for  $\text{C}_{16}\text{H}_{17}\text{NO}_4$  ( $\text{M}^+$ ) 287.1158, Found 287.1158. **Benzyl (((1S\*,2S\*,5S\*)-3-oxo-8-oxabicyclo[3.2.1]oct-6-en-2-yl)methyl)carbamate ( $\beta$ -4fa)**: White solid; mp: 101-102 °C;  $R_f = 0.42$  (50% EtOAc in hexane);  $^1\text{H}$  NMR (500 MHz,  $\text{CDCl}_3$ )  $\delta$  7.37-7.29 (m, 5H), 6.30 (dd,  $J = 6.0, 1.5$  Hz, 1H), 6.25 (dd,  $J = 6.0, 1.1$  Hz, 1H), 5.15 (br s, 1H), 5.09 (s, 2H), 5.01 (d,  $J = 4.7$  Hz, 1H), 4.84 (s, 1H), 3.65-3.55 (m, 2H), 2.83 (dd,  $J = 16.7, 5.0$  Hz, 1H), 2.43 (dd,  $J = 7.2, 7.2$  Hz, 1H), 2.30 (d,  $J = 16.7$  Hz, 1H) ppm;  $^{13}\text{C}$  NMR (125 MHz,  $\text{CDCl}_3$ )  $\delta$  206.7, 156.3, 136.4, 134.3, 132.8, 128.5, 128.5, 128.2, 79.4, 77.4, 66.9, 55.7, 45.1, 41.6 ppm; IR ( $\text{CH}_2\text{Cl}_2$ ) 3445 (NH), 3044, 2959, 1721 (C=O), 1607, 1514, 1337, 1242, 1219  $\text{cm}^{-1}$ ; LRMS (EI, 20 eV)  $m/z$  287 ( $\text{M}^+$ , 2), 219 (3), 185 (10), 176 (3), 136 (14), 108 (22), 91 (100), 81 (23), 79 (17), 70 (11); HRMS (EI, 20 eV) Calculated for  $\text{C}_{16}\text{H}_{17}\text{NO}_4$  ( $\text{M}^+$ ) 287.1158, Found 287.1152.

**Table 2, entry 11:**

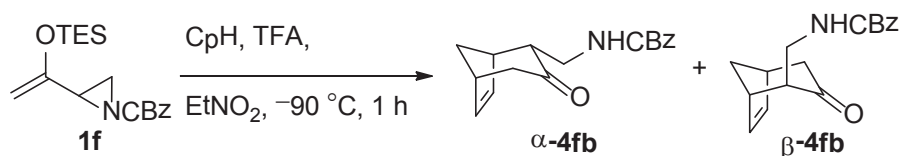

According to the general procedure for the cycloaddition reaction, aziridinylolefin **1f** (0.0728 g, 0.218 mmol) in EtNO<sub>2</sub> (2.2 mL) was subjected to reaction with freshly cracked cyclopentadiene (0.090 mL, 1.1 mmol) and TFA (0.020 mL, 0.26 mmol) at -90 °C. After 1 h, aqueous NaHCO<sub>3</sub> was added and the reaction was worked up. The crude product was purified by flash column chromatography using 20% EtOAc in hexane to afford cycloadducts  $\alpha$ -**4fb** and  $\beta$ -**4fb** (0.0494 g, 79% yield, 58:42). Analytically pure samples of  $\alpha$ -**4fb** and  $\beta$ -**4fb** were obtained by further careful column chromatography using 1% acetone in CH<sub>2</sub>Cl<sub>2</sub>. **Benzyl (((1R\*,2R\*,5R\*)-3-oxobicyclo[3.2.1]oct-6-en-2-yl)methyl)carbamate ( $\alpha$ -4fb)**: Colourless oil;  $R_f = 0.60$  (30% EtOAc in hexane);  $^1\text{H}$  NMR (500 MHz,  $\text{CDCl}_3$ )  $\delta$  7.35-7.28 (m, 5H), 6.05 (dd,  $J = 5.8, 2.8$  Hz, 1H), 5.95 (dd,  $J = 5.6, 2.6$  Hz, 1H), 5.42 (br s, 1H), 5.10 (d,  $J = 12.4$  Hz, 1H), 5.07 (d,  $J = 12.4$  Hz, 1H), 3.38 (ddd,  $J = 13.9, 8.4, 4.5$  Hz, 1H), 3.19 (ddd,  $J = 13.9, 8.2, 4.4$  Hz, 1H), 2.92-2.88 (m, 2H), 2.63 (ddd,  $J = 7.5, 3.8, 3.2$  Hz, 1H), 2.43 (dd,  $J = 16.0, 3.3$  Hz, 1H), 2.30 (ddd,  $J = 16.0, 2.7, 2.7$  Hz, 1H), 2.16-2.11 (m, 1H), 1.86 (d,  $J = 11.0$  Hz, 1H) ppm;  $^{13}\text{C}$  NMR (125 MHz,  $\text{CDCl}_3$ )  $\delta$  211.7, 156.5, 137.1, 136.6, 133.5, 128.5, 128.1, 128.0, 66.6, 57.1, 45.9, 43.6, 43.2, 41.1, 39.4 ppm; IR ( $\text{CH}_2\text{Cl}_2$ ) 3445 (NH), 3069, 3044, 2953, 1719 (C=O), 1510, 1225  $\text{cm}^{-1}$ ; LRMS (EI, 20 eV)  $m/z$  285 ( $\text{M}^+$ , 5), 219 (8), 194 (19), 150 (5), 134 (6),

Supplementary Material (ESI) for Chemical Communications  
This journal is (c) The Royal Society of Chemistry 2013

122 (7), 114 (15), 108 (23), 91 (100), 79 (36), 77 (11); HRMS (EI, 20 eV) Calculated for C<sub>17</sub>H<sub>19</sub>NO<sub>3</sub> (M<sup>+</sup>) 285.1365, Found 285.1366. **Benzyl (((1S\*,2R\*,5S\*)-3-oxobicyclo[3.2.1]oct-6-en-2-yl)methyl)carbamate ( $\beta$ -4fb):** Colourless oil; R<sub>f</sub> = 0.51 (30% EtOAc in hexane); <sup>1</sup>H NMR (500 MHz, CDCl<sub>3</sub>)  $\delta$  7.35-7.30 (m, 5H), 6.09 (dd, *J* = 5.5, 2.6 Hz, 1H), 6.03 (dd, *J* = 5.3, 2.6 Hz, 1H), 5.09 (s, 3H), 3.48 (ddd, *J* = 13.6, 7.0, 7.0 Hz, 1H), 3.40 (ddd, *J* = 13.6, 8.7, 4.9 Hz, 1H), 2.86 (s, 1H), 2.77 (s, 1H), 2.49 (dd, *J* = 17.7, 3.6 Hz, 1H), 2.36 (dd, *J* = 7.6, 7.6 Hz, 1H), 2.32 (d, *J* = 17.6 Hz, 1H), 1.94 (s, 2H) ppm; <sup>13</sup>C NMR (125 MHz, CDCl<sub>3</sub>)  $\delta$  212.1, 156.4, 137.0, 136.5, 135.7, 128.5, 128.1, 128.1, 66.8, 54.6, 45.0, 42.4, 41.1, 38.0, 36.9 ppm; IR (CH<sub>2</sub>Cl<sub>2</sub>) 3443 (NH), 3069, 3044, 2992, 2980, 1719 (C=O), 1699, 1508, 1223 cm<sup>-1</sup>; LRMS (EI, 20 eV) *m/z* 285 (M<sup>+</sup>, 4), 219 (3), 194 (12), 150 (5), 134 (8), 122 (27), 108 (25), 91 (100), 79 (39), 77 (18); HRMS (EI, 20 eV) Calculated for C<sub>17</sub>H<sub>19</sub>NO<sub>3</sub> (M<sup>+</sup>) 285.1365, Found 285.1359.

**Table 2, entry 12:**

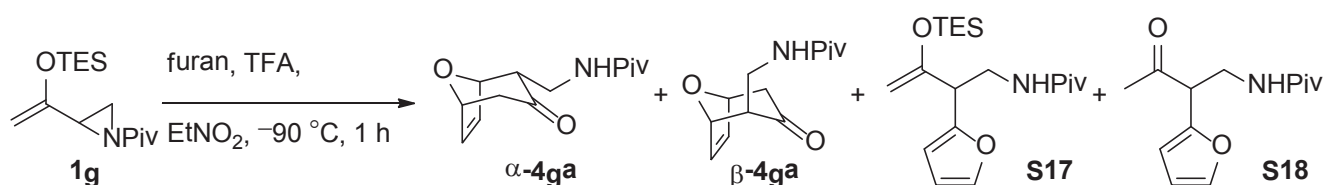

According to the general procedure for the cycloaddition reaction, aziridinyl enolsilane **1g** (0.1419 g, 0.5006 mmol) in EtNO<sub>2</sub> (5.0 mL) was subjected to reaction with furan (0.180 mL, 2.47 mmol) and TFA (0.045 mL, 0.59 mmol) at -90 °C. After 1 h, aqueous NaHCO<sub>3</sub> was added and the reaction was worked up. The crude product was purified by flash column chromatography using 40% EtOAc in hexane to afford cycloadducts  $\alpha$ -**4ga** (0.0225 g, 14% yield) and  $\beta$ -**4ga** (0.0238 g, 20% yield) and alkylation product **S17** (0.0475 g, 27% yield) and **S18** (0.0169 g, 14% yield). **N-(((1R\*,2S\*,5R\*)-3-Oxo-8-oxabicyclo[3.2.1]oct-6-en-2-yl)methyl)pivalamide ( $\alpha$ -4ga):** White solid; mp: 128-130 °C; R<sub>f</sub> = 0.35 (50% EtOAc in hexane); <sup>1</sup>H NMR (500 MHz, CDCl<sub>3</sub>)  $\delta$  6.31 (br s, 1H), 6.29 (dd, *J* = 6.1, 1.6 Hz, 1H), 6.24 (dd, *J* = 6.1, 1.6 Hz, 1H), 5.03 (ddd, *J* = 5.0, 1.2, 1.2 Hz, 1H), 4.95 (dd, *J* = 4.5, 1.5 Hz, 1H), 3.57 (ddd, *J* = 13.8, 7.6, 4.8 Hz, 1H), 3.13 (ddd, *J* = 13.8, 7.3, 4.8 Hz, 1H), 2.88 (ddd, *J* = 7.4, 4.6, 4.6 Hz, 1H), 2.75 (dd, *J* = 15.8, 5.0 Hz, 1H), 2.30 (d, *J* = 15.8 Hz, 1H), 1.17 (s, 9H) ppm; <sup>13</sup>C NMR (125 MHz, CDCl<sub>3</sub>)  $\delta$  207.9, 178.4, 134.5, 132.3, 79.9, 78.0, 57.8, 45.7, 38.7, 36.0, 27.5 ppm; IR (CH<sub>2</sub>Cl<sub>2</sub>) 3464 (NH), 3069, 3044, 2992, 2967, 1709 (C=O), 1657 (C=O), 1514, 1481, 1366, 1200 cm<sup>-1</sup>; LRMS (EI, 20 eV) *m/z* 237 (M<sup>+</sup>, 5), 208 (54), 169 (98), 156 (31), 136 (100), 126 (25), 114 (29), 102 (30), 94 (24), 85 (63), 70 (22); HRMS (EI, 20 eV) Calculated for C<sub>13</sub>H<sub>19</sub>NO<sub>3</sub> (M<sup>+</sup>) 237.1365, Found 237.1361. **N-(((1S\*,2S\*,5S\*)-3-Oxo-8-oxabicyclo[3.2.1]oct-6-en-2-**

Supplementary Material (ESI) for Chemical Communications  
This journal is (c) The Royal Society of Chemistry 2013

**yl)methyl)pivalamide ( $\beta$ -4ga):** White solid; mp: 173-176 °C;  $R_f$  = 0.18 (50% EtOAc in hexane);  $^1\text{H}$  NMR (500 MHz,  $\text{CDCl}_3$ )  $\delta$  6.30 (dd,  $J$  = 6.0, 1.6 Hz, 1H), 6.26 (dd,  $J$  = 6.0, 1.6 Hz, 1H), 6.09 (br s, 1H), 5.02 (d,  $J$  = 5.3 Hz, 1H), 4.82 (s, 1H), 3.67 (ddd,  $J$  = 13.8, 6.3, 5.8 Hz, 1H), 3.58 (ddd,  $J$  = 13.8, 9.3, 4.9 Hz, 1H), 2.85 (dd,  $J$  = 16.7, 5.1 Hz, 1H), 2.40 (dd,  $J$  = 9.3, 5.3 Hz, 1H), 2.29 (d,  $J$  = 16.7 Hz, 1H), 1.17 (s, 9H) ppm;  $^{13}\text{C}$  NMR (125 MHz,  $\text{CDCl}_3$ )  $\delta$  207.0, 178.6, 134.3, 132.9, 79.8, 77.4, 55.1, 45.1, 40.1, 38.7, 27.5 ppm; IR ( $\text{CH}_2\text{Cl}_2$ ) 3466 (NH), 3067, 3046, 2992, 2967, 1711 (C=O), 1663 (C=O), 1516, 1366, 1337, 1180  $\text{cm}^{-1}$ ; LRMS (EI, 20 eV)  $m/z$  237 ( $\text{M}^+$ , 4), 208 (32), 169 (44), 136 (100), 124 (53), 107 (43), 94 (46), 85 (53), 77 (64), 70 (24); HRMS (EI, 20 eV) Calculated for  $\text{C}_{13}\text{H}_{19}\text{NO}_3$  ( $\text{M}^+$ ) 237.1365, Found 237.1374. **N-(2-(Furan-2-yl)-3-(triethylsilyloxy)but-3-en-1-yl)pivalamide (S17):** Colourless oil;  $R_f$  = 0.58 (20% EtOAc in hexane);  $^1\text{H}$  NMR (300 MHz,  $\text{CDCl}_3$ )  $\delta$  3.33-3.32 (m, 1H), 6.30 (dd,  $J$  = 3.1, 2.0 Hz, 1H), 6.13 (d,  $J$  = 3.2 Hz, 1H), 5.86 (br s, 1H), 4.18 (d,  $J$  = 1.1 Hz, 1H), 4.14 (d,  $J$  = 1.1 Hz, 1H), 3.70-3.59 (m, 3H), 1.15 (s, 9H), 0.92 (t,  $J$  = 8.0 Hz, 9H), 0.65 (q,  $J$  = 7.7 Hz, 6H) ppm;  $^{13}\text{C}$  NMR (100 MHz,  $\text{CDCl}_3$ )  $\delta$  178.5, 156.6, 153.6, 141.4, 110.4, 106.6, 91.3, 45.7, 40.1, 38.8, 27.6, 6.7, 4.8 ppm; IR ( $\text{CH}_2\text{Cl}_2$ ) 3468 (NH), 3061, 2961, 2913, 2787, 1659 (C=O), 1481, 1460, 1364, 1225, 1200, 1011  $\text{cm}^{-1}$ ; LRMS (EI, 20 eV)  $m/z$  351 ( $\text{M}^+$ , 59), 308 (8), 250 (44), 221 (42), 136 (81), 124 (100), 94 (36); HRMS (EI, 20 eV) Calculated for  $\text{C}_{19}\text{H}_{33}\text{NO}_3\text{Si}$  ( $\text{M}^+$ ) 351.2230, Found 351.2226. **N-(2-(Furan-2-yl)-3-oxobutyl)pivalamide (S18):** White solid; mp: 71-74 °C;  $R_f$  = 0.59 (50% EtOAc in hexane);  $^1\text{H}$  NMR (400 MHz,  $\text{CDCl}_3$ )  $\delta$  7.61 (dd,  $J$  = 1.8, 0.7 Hz, 1H), 6.59 (dd,  $J$  = 3.2, 1.8 Hz, 1H), 6.47 (d,  $J$  = 3.2 Hz, 1H), 6.31 (br s, 1H), 4.36 (dd,  $J$  = 7.8, 6.0 Hz, 1H), 3.98-3.83 (m, 2H), 2.35 (s, 3H), 1.88 (s, 9H) ppm;  $^{13}\text{C}$  NMR (100 MHz,  $\text{CDCl}_3$ )  $\delta$  206.0, 178.8, 149.9, 142.8, 110.9, 108.6, 52.0, 39.2, 38.8, 29.1, 27.6 ppm; IR ( $\text{CH}_2\text{Cl}_2$ ) 3468 (NH), 3067, 3044, 2965, 2936, 1717 (C=O), 1659 (C=O), 1514, 1364, 1200, 1165, 1011  $\text{cm}^{-1}$ ; LRMS (EI, 20 eV)  $m/z$  237 ( $\text{M}^+$ , 13), 195 (18), 136 (61), 124 (100), 94 (47); HRMS (EI, 20 eV) Calculated for  $\text{C}_{13}\text{H}_{19}\text{NO}_3$  ( $\text{M}^+$ ) 237.1365, Found 237.1364.

**Table 2, entry 13:**

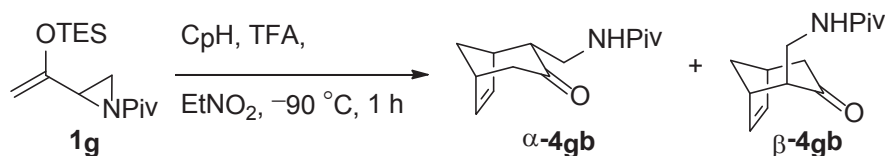

According to the general procedure for the cycloaddition reaction, aziridinyl enolsilane **1g** (0.1418 g, 0.5002 mmol) in EtNO<sub>2</sub> (5.0 mL) was subjected to reaction with freshly cracked cyclopentadiene (0.210 mL, 2.54 mmol) and TFA (0.045 mL, 0.59 mmol) at -90 °C. After 1 h, aqueous NaHCO<sub>3</sub> was added and the reaction was worked up. The crude product was purified by flash column chromatography using 30% EtOAc in hexane to afford cycloadducts  $\alpha$ -4gb and  $\beta$ -4gb (0.0843 g,

Supplementary Material (ESI) for Chemical Communications  
This journal is (c) The Royal Society of Chemistry 2013

72% yield, 58:42). **N-(((1*R*\*,2*R*\*,5*R*\*)-3-Oxobicyclo[3.2.1]oct-6-en-2-yl)methyl)pivalamide ( $\alpha$ -4gb):** White solid; mp: 106-109 °C;  $R_f = 0.47$  (50% EtOAc in hexane);  $^1\text{H NMR}$  (500 MHz,  $\text{CDCl}_3$ )  $\delta$  6.51 (br s, 1H), 6.05 (dd,  $J = 5.7, 2.7$  Hz, 1H), 5.96 (dd,  $J = 5.7, 2.7$  Hz, 1H), 3.61 (ddd,  $J = 13.4, 8.3, 4.0$  Hz, 1H), 3.01 (ddd,  $J = 13.6, 8.9, 3.9$  Hz, 1H), 2.91-2.89 (m, 1H), 2.87-2.85 (m, 1H), 2.58 (ddd,  $J = 8.8, 3.6, 3.6$  Hz, 1H), 2.44 (dd,  $J = 16.1, 3.4$  Hz, 1H), 2.31 (ddd,  $J = 16.1, 1.7$  Hz, 1H), 2.15-2.10 (m, 1H), 1.85 (d,  $J = 11.0$  Hz, 1H), 1.15 (s, 9H) ppm;  $^{13}\text{C NMR}$  (125 MHz,  $\text{CDCl}_3$ )  $\delta$  212.5, 178.3, 137.0, 133.7, 56.9, 46.0, 43.5, 43.4, 39.7, 39.3, 38.6, 27.5 ppm; IR ( $\text{CH}_2\text{Cl}_2$ ) 3464 (NH), 3067, 3044, 2992, 2959, 1701 (C=O), 1655 (C=O), 1514, 1481, 1418, 1356, 1269, 1198  $\text{cm}^{-1}$ ; LRMS (EI, 20 eV)  $m/z$  235 ( $\text{M}^+$ , 11), 206 (5), 192 (5), 169 (27), 134 (100), 102 (26), 91 (22), 85 (20); HRMS (EI, 20 eV) Calculated for  $\text{C}_{14}\text{H}_{21}\text{NO}_2$  ( $\text{M}^+$ ) 235.1572, Found 235.1567. **N-(((1*S*\*,2*R*\*,5*S*\*)-3-Oxobicyclo[3.2.1]oct-6-en-2-yl)methyl)pivalamide ( $\beta$ -4gb):** White solid; mp: 175-177 °C;  $R_f = 0.41$  (50% EtOAc in hexane);  $^1\text{H NMR}$  (500 MHz,  $\text{CDCl}_3$ )  $\delta$  6.13 (br s, 1H), 6.09 (dd,  $J = 5.6, 2.8$  Hz, 1H), 6.04 (dd,  $J = 5.7, 2.8$  Hz, 1H), 3.58 (ddd,  $J = 13.6, 6.4, 5.9$  Hz, 1H), 3.34 (ddd,  $J = 13.6, 10.5, 4.1$  Hz, 1H), 2.88-2.86 (m, 1H), 2.75-2.73 (m, 1H), 2.52 (dd,  $J = 18.0, 3.9$  Hz, 1H), 2.35-2.30 (m, 2H), 1.97-1.94 (m, 2H), 1.18 (s, 9H) ppm;  $^{13}\text{C NMR}$  (125 MHz,  $\text{CDCl}_3$ )  $\delta$  212.8, 178.6, 136.9, 135.8, 54.1, 45.1, 41.6, 40.9, 38.7, 38.1, 37.1, 27.5 ppm; IR ( $\text{CH}_2\text{Cl}_2$ ) 3464 (NH), 3067, 3044, 2992, 2980, 1701 (C=O), 1659 (C=O), 1516, 1200  $\text{cm}^{-1}$ ; LRMS (EI, 20 eV)  $m/z$  235 ( $\text{M}^+$ , 8), 206 (6), 192 (5), 169 (16), 134 (100), 122 (51), 102 (33), 91 (41), 85 (36); HRMS (EI, 20 eV) Calculated for  $\text{C}_{14}\text{H}_{21}\text{NO}_2$  ( $\text{M}^+$ ) 235.1572, Found 235.1566.

### (4 + 3) Cycloaddition of aziridinyl enolsilanes 1h-m with dienes (Table 3)

Table 3, entry 1:

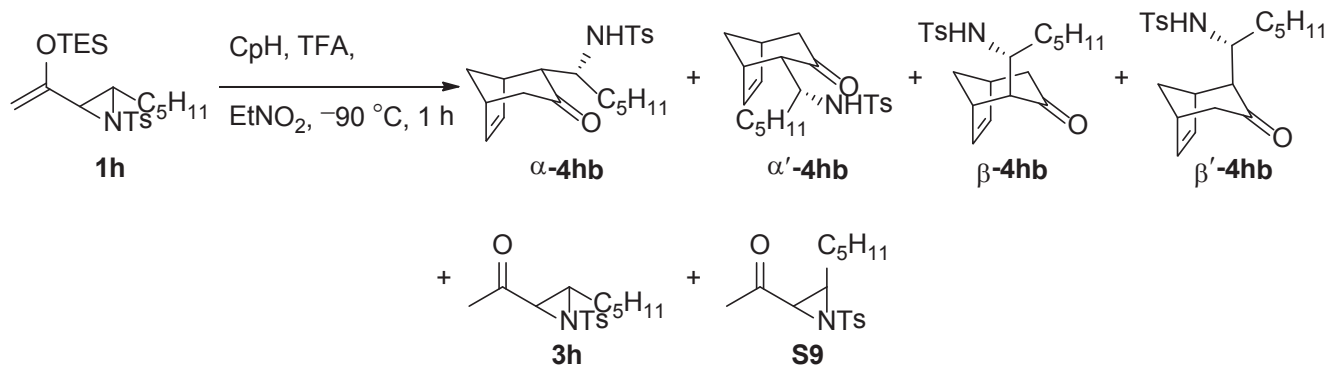

According to the general procedure for the cycloaddition reaction, aziridinyl enolsilane **1h** (0.2107 g, 0.4973 mmol) in EtNO<sub>2</sub> (5.0 mL) was subjected to reaction with freshly cracked cyclopentadiene (0.210 mL, 2.54 mmol) and TFA (0.190 mL, 2.48 mmol) at -90 °C. After 1 h, aqueous NaHCO<sub>3</sub>

Supplementary Material (ESI) for Chemical Communications  
This journal is (c) The Royal Society of Chemistry 2013

was added and the reaction was worked up. The crude product was purified by flash column chromatography using 20% EtOAc in hexane to afford cycloadducts  **$\alpha$ -4hb**,  **$\alpha'$ -4hb**,  **$\beta$ -4hb** and  **$\beta'$ -4hb** (0.1139 g, 61% yield, 54:4:38:4) and desilylation product **3i** and **S9** (0.0363 g, 24% yield, 14.4:1).

**4-Methyl-N-((R\*)-1-((1R\*,2R\*,5R\*)-3-oxobicyclo[3.2.1]oct-6-en-2-yl)hexyl)benzenesulfonamide ( $\alpha$ -4hb):** Colourless oil;  $R_f = 0.53$  (90% CH<sub>2</sub>Cl<sub>2</sub> in hexane); <sup>1</sup>H NMR (500 MHz, CDCl<sub>3</sub>)  $\delta$  7.72 (d,  $J = 8.2$  Hz, 2H), 7.27 (d,  $J = 8.2$  Hz, 2H), 6.09 (dd,  $J = 5.7, 2.9$  Hz, 1H), 5.96 (dd,  $J = 5.7, 2.8$  Hz, 1H), 4.88 (d,  $J = 8.6$  Hz, 1H), 3.47 (dddd,  $J = 14.0, 8.4, 5.9, 2.9$  Hz, 1H), 2.99-2.97 (m, 1H), 2.88-2.85 (m, 2H), 2.42-2.38 (m, 4H), 2.20 (ddd,  $J = 15.5, 2.6, 2.6$  Hz, 1H), 2.11 (dddd,  $J = 10.4, 5.1, 5.1, 2.8$  Hz, 1H), 1.81 (d,  $J = 10.7$  Hz, 1H), 1.44-1.36 (m, 1H), 1.12-0.83 (m, 7H), 0.71 (t,  $J = 7.1$  Hz, 3H) ppm; <sup>13</sup>C NMR (125 MHz, CDCl<sub>3</sub>)  $\delta$  210.1, 143.2, 138.3, 135.3, 135.3, 129.6, 127.0, 60.8, 55.2, 45.6, 45.2, 43.1, 39.6, 34.0, 31.2, 26.2, 22.4, 21.4, 13.8 ppm; IR (CH<sub>2</sub>Cl<sub>2</sub>) 3379 (NH), 3073, 2990, 2957, 2932, 2872, 1703 (C=O), 1599, 1420, 1348, 1329, 1281, 1159, 1093 cm<sup>-1</sup>; LRMS (EI, 20 eV)  $m/z$  375 (M<sup>+</sup>, 1), 304 (11), 254 (13), 204 (13), 155 (52), 91 (100); HRMS (EI, 20 eV) Calculated for C<sub>21</sub>H<sub>29</sub>NO<sub>3</sub>S (M<sup>+</sup>) 375.1868, Found 375.1860.

**4-Methyl-N-((R\*)-1-((1S\*,2S\*,5S\*)-3-oxobicyclo[3.2.1]oct-6-en-2-yl)hexyl)benzenesulfonamide ( $\alpha'$ -4hb):** White solid; mp: 79-80 °C;  $R_f = 0.31$  (70% CH<sub>2</sub>Cl<sub>2</sub> in hexane); <sup>1</sup>H NMR (500 MHz, CDCl<sub>3</sub>)  $\delta$  7.72 (d,  $J = 8.2$  Hz, 2H), 7.27 (d,  $J = 8.0$  Hz, 2H), 6.02-5.99 (m, 2H), 5.15 (d,  $J = 9.7$  Hz, 1H), 3.28 (dddd,  $J = 14.0, 9.7, 4.3, 4.3$  Hz, 1H), 2.86-2.83 (m, 2H), 2.73 (dd,  $J = 4.6, 2.5$  Hz, 1H), 2.41 (s, 3H), 2.30 (dd,  $J = 16.0, 3.5$  Hz, 1H), 2.17 (ddd,  $J = 16.0, 2.6, 2.6$  Hz, 1H), 2.10 (dddd,  $J = 10.6, 5.1, 5.1, 2.6$  Hz, 1H), 1.70 (d,  $J = 10.6$  Hz, 1H), 1.47-1.39 (m, 1H), 1.30-1.22 (m, 1H), 1.15-1.01 (m, 5H), 0.93-0.83 (m, 1H), 0.75 (t,  $J = 6.8$  Hz, 3H) ppm; <sup>13</sup>C NMR (125 MHz, CDCl<sub>3</sub>)  $\delta$  210.6, 143.1, 138.5, 136.5, 134.4, 129.5, 127.1, 61.4, 55.5, 45.5, 45.2, 42.7, 39.3, 32.3, 31.4, 26.0, 22.5, 21.5, 13.9 ppm; IR (CH<sub>2</sub>Cl<sub>2</sub>) 3376 (NH), 3069, 2957, 2932, 2872, 1701 (C=O), 1599, 1418, 1159, 1092 cm<sup>-1</sup>; LRMS (EI, 20 eV)  $m/z$  375 (M<sup>+</sup>, 1), 304 (2), 254 (27), 155 (43), 91 (100); HRMS (EI, 20 eV) Calculated for C<sub>21</sub>H<sub>29</sub>NO<sub>3</sub>S (M<sup>+</sup>) 375.1868, Found 375.1862.

**4-Methyl-N-((R\*)-1-((1S\*,2R\*,5S\*)-3-oxobicyclo[3.2.1]oct-6-en-2-yl)hexyl)benzenesulfonamide ( $\beta$ -4hb):** White solid; mp: 131-133 °C;  $R_f = 0.28$  (90% CH<sub>2</sub>Cl<sub>2</sub> in hexane); <sup>1</sup>H NMR (500 MHz, CDCl<sub>3</sub>)  $\delta$  7.69 (d,  $J = 8.2$  Hz, 2H), 7.27 (d,  $J = 8.0$  Hz, 2H), 6.02 (dd,  $J = 5.7, 2.7$  Hz, 1H), 5.92 (dd,  $J = 5.7, 2.9$  Hz, 1H), 4.89 (d,  $J = 6.5$  Hz, 1H), 3.47 (dddd,  $J = 13.1, 10.1, 6.1, 4.2$  Hz, 1H), 2.75-2.72 (m, 2H), 2.41 (s, 3H), 2.18 (d,  $J = 9.2$  Hz, 1H), 2.08 (d,  $J = 17.2$  Hz, 1H), 1.89-1.82 (m, 3H), 1.67-1.61 (m, 1H), 1.43-1.36 (m, 1H), 1.22-1.05 (m, 6H), 0.80 (t,  $J = 6.9$  Hz, 3H) ppm; <sup>13</sup>C NMR (125 MHz, CDCl<sub>3</sub>)  $\delta$  211.8, 143.3, 137.5, 137.5, 135.2, 129.5, 127.4, 57.1, 54.1, 45.3, 40.3, 38.2,



Supplementary Material (ESI) for Chemical Communications  
This journal is (c) The Royal Society of Chemistry 2013

36.7, 33.2, 31.6, 23.2, 22.5, 21.5, 13.9 ppm; IR (CH<sub>2</sub>Cl<sub>2</sub>) 3370 (NH), 3073, 2957, 2932, 2861, 1697 (C=O), 1599, 1418, 1348, 1163, 1094 cm<sup>-1</sup>; LRMS (EI, 20 eV) m/z 375 (M<sup>+</sup>, 1), 304 (3), 254 (57), 155 (66), 91 (100); HRMS (EI, 20 eV) Calculated for C<sub>21</sub>H<sub>29</sub>NO<sub>3</sub>S (M<sup>+</sup>) 375.1868, Found 375.1867.

**4-Methyl-N-((R\*)-1-((1R\*,2S\*,5R\*)-3-oxobicyclo[3.2.1]oct-6-en-2-yl)hexyl)benzenesulfonamide (β'-4hb):** Colourless oil; R<sub>f</sub> = 0.17 (70% CH<sub>2</sub>Cl<sub>2</sub> in hexane); <sup>1</sup>H NMR (500 MHz, CDCl<sub>3</sub>) δ 7.73 (d, J = 8.2 Hz, 2H), 7.28 (d, J = 8.0 Hz, 2H), 6.03 (dd, J = 5.6, 2.7 Hz, 1H), 5.89 (dd, J = 5.6, 2.8 Hz, 1H), 4.87 (d, J = 9.4 Hz, 1H), 3.57 (dddd, J = 13.7, 9.3, 6.4, 4.5 Hz, 1H), 2.81-2.77 (m, 2H), 2.41 (s, 3H), 2.34 (dd, J = 17.4, 3.8 Hz, 1H), 2.24 (ddd, J = 17.4, 2.3, 2.3 Hz, 1H), 2.10 (d, J = 6.4 Hz, 1H), 2.02 (d, J = 11.5 Hz, 1H), 1.85-1.80 (m, 1H), 1.43-1.36 (m, 1H), 1.29-1.15 (m, 2H), 1.12-1.01 (m, 4H), 0.99-0.91 (m, 1H), 0.76 (t, J = 6.9 Hz, 3H) ppm; <sup>13</sup>C NMR (125 MHz, CDCl<sub>3</sub>) δ 212.3, 143.4, 138.2, 137.2, 136.2, 129.6, 127.1, 58.1, 55.4, 46.0, 40.2, 37.9, 37.4, 33.8, 31.4, 25.0, 22.4, 21.5, 13.9 ppm; IR (CH<sub>2</sub>Cl<sub>2</sub>) 3376 (NH), 3071, 2957, 2932, 2861, 1701 (C=O), 1599, 1425, 1418, 1336, 1279, 1161, 1092 cm<sup>-1</sup>; LRMS (EI, 20 eV) m/z 375 (M<sup>+</sup>, 1), 304 (1), 254 (60), 155 (63), 91 (100); HRMS (EI, 20 eV) Calculated for C<sub>21</sub>H<sub>29</sub>NO<sub>3</sub>S (M<sup>+</sup>) 375.1868, Found 375.1862.

**Table 3, entry 2:**

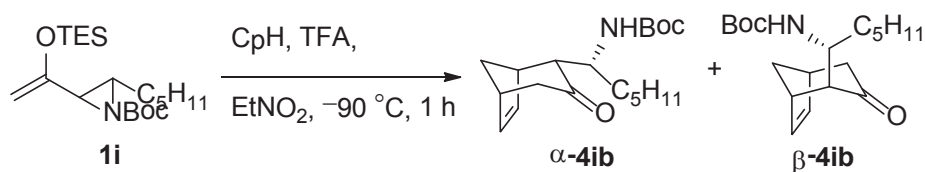

According to the general procedure for the cycloaddition reaction, aziridinyl enolsilane **1i** (0.1847 g, 0.4997 mmol) in EtNO<sub>2</sub> (5.0 mL) was subjected to reaction with freshly cracked cyclopentadiene (0.210 mL, 2.54 mmol) and TFA (0.045 mL, 0.59 mmol) at -90 °C. After 1 h, aqueous NaHCO<sub>3</sub> was added and the reaction was worked up. The crude product was purified by flash column chromatography using 10% EtOAc in hexane to afford cycloadducts **α-4ib** and **β-4ib** (0.1603 g, 100% yield, 60:40).

**tert-Butyl ((R\*)-1-((1R\*,2R\*,5R\*)-3-oxobicyclo[3.2.1]oct-6-en-2-yl)hexyl)carbamate (α-4ib):** Colourless oil; R<sub>f</sub> = 0.62 (20% EtOAc in hexane); <sup>1</sup>H NMR (500 MHz, CDCl<sub>3</sub>) δ 5.96-5.93 (m, 2H), 4.89 (d, J = 10.0 Hz, 1H), 3.69 (dddd, J = 10.2, 10.0, 4.9, 1.7 Hz, 1H), 2.91-2.89 (m, 1H), 2.86-2.84 (m, 1H), 2.68 (s, 1H), 2.39 (dd, J = 15.4, 3.2 Hz, 1H), 2.21 (ddd, J = 15.4, 2.7, 2.7 Hz, 1H), 2.11-2.06 (m, 1H), 1.83 (d, J = 10.7 Hz, 1H), 1.68-1.61 (m, 1H), 1.47-1.43 (m, 1H), 1.41 (s, 9H), 1.32-1.20 (m, 6H), 0.84 (t, J = 6.7 Hz, 3H) ppm; <sup>13</sup>C NMR (125 MHz, CDCl<sub>3</sub>) δ 210.8, 155.7, 135.1, 134.8, 78.7, 61.2, 52.8, 46.0, 45.6, 45.1, 39.7, 35.8, 31.5, 28.5, 26.4, 22.6, 14.0 ppm; IR (CH<sub>2</sub>Cl<sub>2</sub>) 3443 (NH), 3067, 3048, 2988, 2957, 2934, 1705 (C=O), 1605, 1499, 1422, 1281, 1171 cm<sup>-1</sup>; LRMS (EI, 20 eV) m/z 321 (M<sup>+</sup>, 2), 265 (7), 250 (8), 204 (23), 194 (47), 144 (33), 100

Supplementary Material (ESI) for Chemical Communications  
This journal is (c) The Royal Society of Chemistry 2013

(100), 79 (25), 70 (79); HRMS (EI, 20 eV) Calculated for C<sub>19</sub>H<sub>31</sub>NO<sub>3</sub> (M<sup>+</sup>) 321.2304, Found 321.2302. **tert-Butyl ((R\*)-1-((1S\*,2R\*,5S\*)-3-oxobicyclo[3.2.1]oct-6-en-2-yl)hexyl)carbamate (β-4ib)**: White solid; mp: 138-142 °C; R<sub>f</sub> = 0.57 (20% EtOAc in hexane); <sup>1</sup>H NMR (500 MHz, CDCl<sub>3</sub>) δ 6.05 (dd, *J* = 5.6, 2.7 Hz, 1H), 5.96 (dd, *J* = 5.6, 2.7 Hz, 1H), 4.44 (d, *J* = 9.8 Hz, 1H), 3.94 (dddd, *J* = 9.3, 9.3, 9.3, 3.2 Hz, 1H), 2.86-2.83 (m, 1H), 2.80-2.078 (m, 1H), 2.68 (dd, *J* = 16.3, 3.3 Hz, 1H), 2.22 (dd, *J* = 16.3, 1.1 Hz, 1H), 2.18 (d, *J* = 11.3 Hz, 1H), 2.11 (d, *J* = 9.3 Hz, 1H), 1.90-1.85 (m, 1H), 1.71-1.68 (m, 1H), 1.38 (s, 9H), 1.33-1.23 (m, 7H), 0.88 (t, *J* = 6.9 Hz, 3H) ppm; <sup>13</sup>C NMR (125 MHz, CDCl<sub>3</sub>) δ 211.3, 155.7, 137.2, 135.0, 79.4, 30.1, 51.5, 45.6, 41.6, 38.8, 36.6, 33.9, 31.6, 28.3, 24.9, 22.5, 14.0 ppm; IR (CH<sub>2</sub>Cl<sub>2</sub>) 3435 (NH), 3069, 2959, 2934, 1707 (C=O), 1606, 1505, 1422, 1368, 1173 cm<sup>-1</sup>; LRMS (EI, 20 eV) *m/z* 321 (M<sup>+</sup>, 1), 265 (1), 205 (16), 144 (57), 122 (33), 100 (100), 79 (34), 70 (17); HRMS (EI, 20 eV) Calculated for C<sub>19</sub>H<sub>31</sub>NO<sub>3</sub> (M<sup>+</sup>) 321.2304, Found 321.2295.

**Table 3, entry 3:**

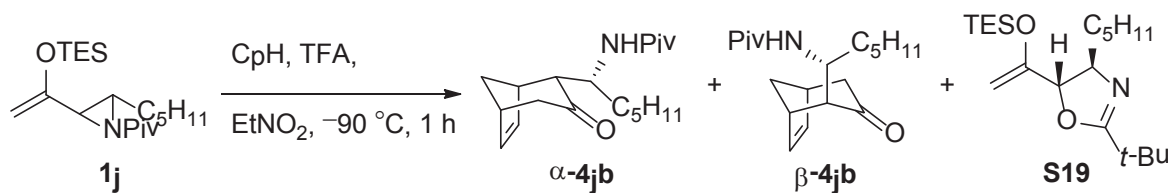

According to the general procedure for the cycloaddition reaction, aziridinyl enolsilane **1j** (0.0770 g, 0.219 mmol) in EtNO<sub>2</sub> (2.2 mL) was subjected to reaction with freshly cracked cyclopentadiene (0.090 mL, 1.1 mmol) and TFA (0.020 mL, 0.26 mmol) at -90 °C. After 1 h, aqueous NaHCO<sub>3</sub> was added and the reaction was worked up. The crude product was purified by flash column chromatography using 20% EtOAc in hexane to afford cycloadducts **α-4jb** and **β-4jb** (0.0574 g, 86% yield, 65:35) and rearrangement product **S19** (0.049 g, 6.4% yield). **N-((R\*)-1-((1R\*,2R\*,5R\*)-3-Oxobicyclo[3.2.1]oct-6-en-2-yl)hexyl)pivalamide (α-4jb)**: White solid; mp: 92-93 °C; R<sub>f</sub> = 0.61 (2% acetone in CH<sub>2</sub>Cl<sub>2</sub>); <sup>1</sup>H NMR (500 MHz, CDCl<sub>3</sub>) δ 6.24 (d, *J* = 9.8 Hz, 1H), 5.94 (dd, *J* = 5.7, 2.7 Hz, 1H), 5.88 (s, *J* = 5.8, 2.9 Hz, 1H), 4.07 (dddd, *J* = 15.2, 9.8, 5.3, 1.4 Hz, 1H), 2.94-2.92 (m, 1H), 2.88-2.85 (m, 1H), 2.72 (dd, *J* = 1.7, 1.7 Hz, 1H), 2.44 (dd, *J* = 15.4, 3.2 Hz, 1H), 2.24 (ddd, *J* = 15.4, 2.8, 2.8 Hz, 1H), 2.09 (dddd, *J* = 13.4, 10.6, 5.2, 3.0 Hz, 1H), 1.84 (d, *J* = 10.8 Hz, 1H), 1.72-1.65 (m, 1H), 1.52-1.46 (m, 1H), 1.29-1.20 (m, 6H), 1.15 (s, 9H), 0.85 (t, *J* = 6.7 Hz, 3H) ppm; <sup>13</sup>C NMR (125 MHz, CDCl<sub>3</sub>) δ 211.8, 177.3, 135.1, 134.8, 61.0, 51.0, 46.2, 46.2, 45.1, 39.7, 38.7, 36.2, 31.5, 27.5, 26.3, 22.6, 14.0 ppm; IR (CH<sub>2</sub>Cl<sub>2</sub>) 3457 (NH), 3065, 3046, 2959, 2934, 2862, 1701 (C=O), 1651 (C=O), 1510, 1283, 1275 cm<sup>-1</sup>; LRMS (EI, 20 eV) *m/z*

Supplementary Material (ESI) for Chemical Communications  
This journal is (c) The Royal Society of Chemistry 2013

305 ( $M^+$ , 9), 234 (59), 220 (25), 204 (29), 184 (81), 154 (100), 102 (55), 85 (60), 70 (63); HRMS (EI, 20 eV) Calculated for  $C_{19}H_{31}NO_2$  ( $M^+$ ) 305.2355, Found 305.2347. **N-(( $R^*$ )-1-((( $1S^*$ , $2R^*$ , $5S^*$ )-3-Oxobicyclo[3.2.1]oct-6-en-2-yl)hexyl)pivalamide ( $\beta$ -4jb):** White solid; mp: 113-115 °C;  $R_f$  = 0.45 (2% acetone in  $CH_2Cl_2$ );  $^1H$  NMR (500 MHz,  $CDCl_3$ )  $\delta$  6.07 (dd,  $J$  = 5.7, 2.7 Hz, 1H), 5.97 (dd,  $J$  = 5.7, 2.9 Hz, 1H), 5.52 (d,  $J$  = 9.0 Hz, 1H), 4.31-4.25 (m, 1H), 2.86-2.83 (m, 1H), 2.83-2.81 (m, 1H), 2.59 (dd,  $J$  = 16.3, 3.4 Hz, 1H), 2.24-2.18 (m, 2H), 2.15 (dd,  $J$  = 10.1, 0.7 Hz, 1H), 1.93-1.88 (m, 1H), 1.80-1.74 (m, 1H), 1.38-1.23 (m, 7H), 1.14 (s, 9H), 0.88 (t,  $J$  = 6.6 Hz, 3H) ppm;  $^{13}C$  NMR (125 MHz,  $CDCl_3$ )  $\delta$  211.3, 178.0, 137.4, 134.9, 59.8, 49.2, 45.6, 41.6, 38.8, 38.6, 36.7, 33.8, 31.6, 27.4, 24.9, 22.5, 14.0 ppm; IR ( $CH_2Cl_2$ ) 3449 (NH), 3063, 3053, 2959, 2934, 1701 (C=O), 1655 (C=O), 1512, 1348, 1120  $cm^{-1}$ ; LRMS (EI, 20 eV)  $m/z$  305 ( $M^+$ , 1), 234 (3), 204 (4), 184 (100), 154 (9), 100 (20), 85 (49), 70 (11); HRMS (EI, 20 eV) Calculated for  $C_{19}H_{31}NO_2$  ( $M^+$ ) 305.2355, Found 305.2346. **( $4R^*$ , $5S^*$ )-2-(*tert*-Butyl)-4-pentyl-5-(1-(triethylsiloxy)vinyl)-4,5-dihydrooxazole (S19):** Colourless oil;  $R_f$  = 0.74 (10% EtOAc in hexane);  $^1H$  NMR (600 MHz,  $C_6D_6$ )  $\delta$  4.41 (d,  $J$  = 1.1 Hz, 1H), 4.33 (d,  $J$  = 6.6 Hz, 1H), 4.23 (dt,  $J$  = 6.6, 6.5 Hz, 1H), 4.19 (d,  $J$  = 1.1 Hz, 1H), 1.73-1.66 (m, 1H), 1.58-1.51 (m, 2H), 1.50-1.45 (m, 1H), 1.34 (s, 9H), 1.26-1.24 (m, 4H), 0.97 (t,  $J$  = 7.9 Hz, 9H), 0.86 (t,  $J$  = 6.7 Hz, 3H), 0.65 (q,  $J$  = 7.9 Hz, 6H) ppm;  $^{13}C$  NMR (150 MHz,  $C_6D_6$ )  $\delta$  172.2, 157.9, 89.2, 85.2, 71.9, 37.4, 33.7, 32.5, 28.5, 26.2, 23.3, 14.6, 7.2, 5.5 ppm; IR ( $CH_2Cl_2$ ) 3065, 2980, 2961, 2934, 1661, 1636, 1481, 1458, 1317, 1142  $cm^{-1}$ ; LRMS (EI, 20 eV)  $m/z$  353 ( $M^+$ , 12), 324 (25), 296 (16), 282 (63), 252 (26), 241 (100), 223 (29), 166 (57), 157 (42), 125 (50), 110 (89), 84 (42); HRMS (EI, 20 eV) Calculated for  $C_{20}H_{39}NO_2Si$  ( $M^+$ ) 353.2750, Found 353.2742.

**Table 3, entry 4:**

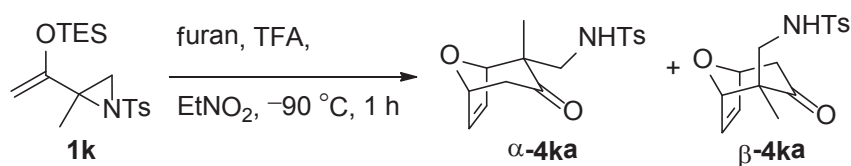

According to the general procedure for the cycloaddition reaction, aziridinyl enolsilane **1k** (0.1829 g, 0.4976 mmol) in  $EtNO_2$  (5.0 mL) was subjected to reaction with furan (0.180 mL, 2.47 mmol) and TFA (0.190 mL, 2.48 mmol) at  $-90$  °C. After 1 h, aqueous  $NaHCO_3$  was added and the reaction was worked up. The crude product was purified by flash column chromatography using 40% EtOAc in hexane to afford cycloadducts  $\alpha$ -**4ka** and  $\beta$ -**4ka** (0.1503 g, 94% yield, 87:13). **4-Methyl-N-((( $1R^*$ , $2S^*$ , $5R^*$ )-2-methyl-3-oxo-8-oxabicyclo[3.2.1]oct-6-en-2-yl)methyl)benzene-sulfonamide ( $\alpha$ -4ka):** White solid; mp: 120-123 °C;  $R_f$  = 0.31 (35% EtOAc in hexane);  $^1H$  NMR

Supplementary Material (ESI) for Chemical Communications  
This journal is (c) The Royal Society of Chemistry 2013

(600 MHz, CDCl<sub>3</sub>)  $\delta$  7.70 (d,  $J$  = 8.2 Hz, 2H), 7.29 (d,  $J$  = 8.2 Hz, 2H), 6.40 (dd,  $J$  = 6.0, 1.7 Hz, 1H), 6.23 (dd,  $J$  = 6.0, 1.5 Hz, 1H), 5.13 (dd,  $J$  = 6.7, 6.7 Hz, 1H), 4.96 (d,  $J$  = 5.0 Hz, 1H), 4.54 (d,  $J$  = 1.6 Hz, 1H), 2.86-2.82 (m, 3H), 2.41 (s, 3H), 2.15 (d,  $J$  = 16.0 Hz, 1H), 1.34 (s, 3H) ppm; <sup>13</sup>C NMR (150 MHz, CDCl<sub>3</sub>)  $\delta$  211.0, 143.5, 136.6, 134.0, 132.9, 129.8, 126.9, 83.9, 77.8, 56.5, 46.2, 43.1, 21.5, 20.0 ppm; IR (CH<sub>2</sub>Cl<sub>2</sub>) 3362 (NH), 3071, 2970, 2934, 1705 (C=O), 1599, 1420, 1410, 1335, 1269, 1163, 1092 cm<sup>-1</sup>; LRMS (EI, 20 eV)  $m/z$  321 (M<sup>+</sup>, 2), 240 (7), 184 (12), 155 (48), 150 (52), 91 (100); HRMS (EI, 20 eV) Calculated for C<sub>16</sub>H<sub>19</sub>NO<sub>4</sub>S (M<sup>+</sup>) 321.1035, Found 321.1033.

**4-Methyl-N-(((1S\*,2S\*,5S\*)-2-methyl-3-oxo-8-oxabicyclo[3.2.1]oct-6-en-2-yl)methyl)benzenesulfonamide ( $\beta$ -4ka):** White solid; mp: 142-146 °C;  $R_f$  = 0.25 (35% EtOAc in hexane); <sup>1</sup>H NMR (500 MHz, CDCl<sub>3</sub>)  $\delta$  7.71 (d,  $J$  = 8.1 Hz, 2H), 7.30 (d,  $J$  = 8.0 Hz, 2H), 6.35 (dd,  $J$  = 6.1, 1.2 Hz, 1H), 6.26 (dd,  $J$  = 6.1, 1.2 Hz, 1H), 5.13 (dd,  $J$  = 6.2, 6.2 Hz, 1H), 4.98 (d,  $J$  = 4.9 Hz, 1H), 4.56 (s, 1H), 3.18 (d,  $J$  = 6.7 Hz, 2H), 2.70 (dd,  $J$  = 16.7, 5.1 Hz, 1H), 2.43 (s, 3H), 2.25 (d,  $J$  = 16.8 Hz, 1H), 0.92 (s, 3H) ppm; <sup>13</sup>C NMR (125 MHz, CDCl<sub>3</sub>)  $\delta$  208.1, 143.6, 136.6, 135.8, 131.9, 129.8, 127.1, 83.5, 78.2, 55.5, 49.6, 44.5, 21.5, 16.3 ppm; IR (CH<sub>2</sub>Cl<sub>2</sub>) 3360 (NH), 3071, 2978, 2940, 1715 (C=O), 1599, 1414, 1337, 1163 cm<sup>-1</sup>; LRMS (EI, 20 eV)  $m/z$  321 (M<sup>+</sup>, 4), 240 (5), 184 (29), 155 (79), 138 (42), 109 (72), 91 (100); HRMS (EI, 20 eV) Calculated for C<sub>16</sub>H<sub>19</sub>NO<sub>4</sub>S (M<sup>+</sup>) 321.1035, Found 321.1031.

**Table 3, entry 5:**

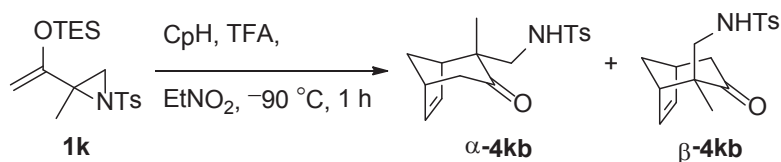

According to the general procedure for the cycloaddition reaction, aziridinyl enolsilane **1k** (0.1818 g, 0.4946 mmol) in EtNO<sub>2</sub> (5.0 mL) was subjected to reaction with freshly cracked cyclopentadiene (0.210 mL, 2.54 mmol) and TFA (0.190 mL, 2.48 mmol) at -90 °C. After 1 h, aqueous NaHCO<sub>3</sub> was added and the reaction was worked up. The crude product was purified by flash column chromatography using 30% EtOAc in hexane to afford cycloadducts  $\alpha$ -**4kb** and  $\beta$ -**4kb** (0.1074 g, 68% yield, 47:53). Analytically pure samples of  $\alpha$ -**4kb** and  $\beta$ -**4kb** were obtained by further careful column chromatography using 1% acetone in CH<sub>2</sub>Cl<sub>2</sub>. **4-Methyl-N-(((1R\*,2R\*,5R\*)-2-methyl-3-oxobicyclo[3.2.1]oct-6-en-2-yl)methyl)benzenesulfonamide ( $\alpha$ -4kb):** White solid; mp: 138-141 °C;  $R_f$  = 0.44 (CH<sub>2</sub>Cl<sub>2</sub>); <sup>1</sup>H NMR (500 MHz, CDCl<sub>3</sub>)  $\delta$  7.71 (d,  $J$  = 8.2 Hz, 2H), 7.29 (d,  $J$  = 8.0 Hz, 2H), 6.05-6.02 (m, 2H), 5.30 (d,  $J$  = 8.6 Hz, 1H), 2.90 (dd,  $J$  = 12.5, 4.0 Hz, 1H), 2.83-2.78 (m, 2H), 2.53 (dd,  $J$  = 16.6, 3.4 Hz, 1H), 2.50 (dd,  $J$  = 5.2, 1.6 Hz, 1H), 2.42 (s, 3H), 2.18 (ddd,  $J$  = 16.6, 2.8, 2.8

Supplementary Material (ESI) for Chemical Communications  
This journal is (c) The Royal Society of Chemistry 2013

Hz, 1H), 2.12 (d,  $J = 11.5$  Hz, 1H), 1.92 (dddd,  $J = 11.2, 5.1, 5.1, 2.8$  Hz, 1H), 1.29 (s, 3H) ppm;  $^{13}\text{C}$  NMR (125 MHz,  $\text{CDCl}_3$ )  $\delta$  215.5, 143.2, 137.2, 137.1, 134.8, 129.7, 127.0, 54.0, 49.3, 48.2, 43.5, 38.7, 38.7, 21.5, 20.8 ppm; IR ( $\text{CH}_2\text{Cl}_2$ ) 3368 (NH), 3071, 2955, 2930, 1697 (C=O), 1599, 1420, 1406, 1335, 1269, 1252, 1163, 1087  $\text{cm}^{-1}$ ; LRMS (EI, 20 eV)  $m/z$  319 ( $\text{M}^+$ , 4), 184 (5), 164 (20), 155 (52), 136 (98), 91 (100); HRMS (EI, 20 eV) Calculated for  $\text{C}_{17}\text{H}_{21}\text{NO}_3\text{S}$  ( $\text{M}^+$ ) 319.1242, Found 319.1236.

**4-Methyl-N-(((1*S*\*,2*R*\*,5*S*\*)-2-methyl-3-oxobicyclo[3.2.1]oct-6-en-2-yl)methyl)benzene-sulfonamide ( $\beta$ -4kf):** White solid; mp: 117-119 °C;  $R_f = 0.21$  ( $\text{CH}_2\text{Cl}_2$ );  $^1\text{H}$  NMR (500 MHz,  $\text{CDCl}_3$ )  $\delta$  7.71 (d,  $J = 8.2$  Hz, 2H), 7.30 (d,  $J = 8.0$  Hz, 2H), 6.11 (dd,  $J = 5.8, 2.8$  Hz, 1H), 6.05 (dd,  $J = 5.8, 3.0$  Hz, 1H), 4.71 (br s, 1H), 3.07 (dd,  $J = 12.6, 7.7$  Hz, 1H), 3.02 (dd,  $J = 12.6, 4.9$  Hz, 1H), 2.80-2.77 (m, 1H), 2.58 (dd,  $J = 4.3, 3.3$  Hz, 1H), 2.43 (s, 3H), 2.28 (dd,  $J = 17.8, 3.8$  Hz, 1H), 2.22 (ddd,  $J = 17.8, 2.4, 2.4$  Hz, 1H), 1.93 (d,  $J = 11.4$  Hz, 1H), 1.92-1.88 (m, 1H), 0.99 (s, 3H) ppm;  $^{13}\text{C}$  NMR (125 MHz,  $\text{CDCl}_3$ )  $\delta$  213.8, 143.6, 138.0, 136.7, 134.7, 129.8, 127.1, 53.6, 49.2, 46.1, 44.0, 38.3, 37.8, 21.5, 20.0 ppm; IR ( $\text{CH}_2\text{Cl}_2$ ) 3364 (NH), 3069, 2953, 1701 (C=O), 1599, 1418, 1339, 1271, 1163, 1094, 1067  $\text{cm}^{-1}$ ; LRMS (EI, 20 eV)  $m/z$  319 ( $\text{M}^+$ , 1), 184 (5), 155 (51), 136 (93), 91 (100); HRMS (EI, 20 eV) Calculated for  $\text{C}_{17}\text{H}_{21}\text{NO}_3\text{S}$  ( $\text{M}^+$ ) 319.1242, Found 319.1235.

**Table 3, entry 6:**

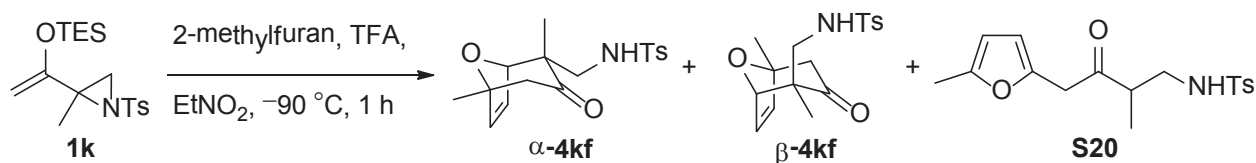

According to the general procedure for the cycloaddition reaction, aziridinyl enolsilane **1k** (0.1808 g, 0.4919 mmol) in  $\text{EtNO}_2$  (5.0 mL) was subjected to reaction with 2-methylfuran (0.225 mL, 2.49 mmol) and TFA (0.190 mL, 2.48 mmol) at  $-90^\circ\text{C}$ . After 1 h, aqueous  $\text{NaHCO}_3$  was added and the reaction was worked up. The crude product was purified by flash column chromatography using 30%  $\text{EtOAc}$  in hexane to afford cycloadducts  $\alpha$ -4kf and  $\beta$ -4kf (0.1503 g, 94% yield, 87:13) and alkylation product **S20** (0.0246 g, 15% yield). **N-(((1*R*\*,2*S*\*,5*R*\*)-2,5-Dimethyl-3-oxo-8-oxabicyclo[3.2.1]oct-6-en-2-yl)methyl)-4-methylbenzenesulfonamide ( $\alpha$ -4kf):** White solid; mp: 120-123 °C;  $R_f = 0.69$  (35%  $\text{EtOAc}$  in hexane);  $^1\text{H}$  NMR (600 MHz,  $\text{CDCl}_3$ )  $\delta$  7.70 (d,  $J = 8.3$  Hz, 2H), 7.30 (d,  $J = 8.2$  Hz, 2H), 6.31 (dd,  $J = 6.0, 1.6$  Hz, 1H), 6.00 (d,  $J = 6.0$  Hz, 1H), 5.14-5.11 (m, 1H), 4.54 (d,  $J = 1.7$  Hz, 1H), 2.88-2.82 (m, 2H), 2.61 (d,  $J = 15.9$  Hz, 1H), 2.42 (s, 3H), 2.22 (d,  $J = 15.9$  Hz, 1H), 1.46 (s, 3H), 1.33 (s, 3H) ppm;  $^{13}\text{C}$  NMR (150 MHz,  $\text{CDCl}_3$ )  $\delta$  211.5, 143.5, 137.1, 136.6, 132.8, 129.8, 126.9, 84.5, 84.3, 54.7, 49.0, 46.3, 22.8, 21.5, 19.9 ppm; IR ( $\text{CH}_2\text{Cl}_2$ ) 3362

Supplementary Material (ESI) for Chemical Communications  
This journal is (c) The Royal Society of Chemistry 2013

(NH), 3071, 2980, 2934, 1703 (C=O), 1599, 1452, 1410, 1335, 1163, 1092  $\text{cm}^{-1}$ ; LRMS (EI, 20 eV)  $m/z$  335 ( $M^+$ , 3), 254 (5), 238 (4), 184 (10), 180 (78), 155 (71), 109 (50), 91 (100); HRMS (EI, 20 eV) Calculated for  $C_{17}H_{21}NO_4S$  ( $M^+$ ) 335.1191, Found 335.1184.

**N-(((1*S*\*,2*S*\*,5*S*\*)-2,5-Dimethyl-3-oxo-8-oxabicyclo[3.2.1]oct-6-en-2-yl)methyl)-4-methyl-benzenesulfonamide ( $\beta$ -4kf):** White solid; mp: 142-146 °C;  $R_f$  = 0.44 (35% EtOAc in hexane);  $^1\text{H}$  NMR (600 MHz,  $\text{CDCl}_3$ )  $\delta$  7.71 (d,  $J$  = 8.2 Hz, 2H), 7.30 (d,  $J$  = 8.2 Hz, 2H), 6.18 (dd,  $J$  = 6.1, 1.9 Hz, 1H), 6.11 (d,  $J$  = 6.0 Hz, 1H), 5.00 (dd,  $J$  = 7.4, 5.2 Hz, 1H), 4.56 (d,  $J$  = 1.8 Hz, 1H), 3.21-3.13 (m, 2H), 2.45 (d,  $J$  = 16.5 Hz, 1H), 2.43 (s, 3H), 2.32 (d,  $J$  = 16.5 Hz, 1H), 1.46 (s, 3H), 0.92 (s, 3H) ppm;  $^{13}\text{C}$  NMR (150 MHz,  $\text{CDCl}_3$ )  $\delta$  208.6, 143.6, 138.7, 136.6, 131.8, 129.8, 127.2, 84.7, 84.1, 53.4, 50.3, 49.5, 22.9, 21.6, 16.4 ppm; IR ( $\text{CH}_2\text{Cl}_2$ ) 3360 (NH), 3071, 2980, 2932, 1713 (C=O), 1599, 1414, 1383, 1337, 1163, 1084  $\text{cm}^{-1}$ ; LRMS (EI, 20 eV)  $m/z$  335 ( $M^+$ , 2), 184 (18), 180 (41), 155 (56), 123 (100), 109 (33), 91 (58); HRMS (EI, 20 eV) Calculated for  $C_{17}H_{21}NO_4S$  ( $M^+$ ) 335.1191, Found 335.1188.

**4-Methyl-N-(2-methyl-4-(5-methylfuran-2-yl)-3-oxobutyl)benzenesulfonamide (S20):** Colourless oil;  $R_f$  = 0.54 (20% EtOAc in hexane);  $^1\text{H}$  NMR (600 MHz,  $\text{CDCl}_3$ )  $\delta$  7.70 (d,  $J$  = 8.3 Hz, 2H), 7.30 (d,  $J$  = 8.0 Hz, 2H), 6.04 (d,  $J$  = 2.9 Hz, 1H), 5.91 (d,  $J$  = 2.9 Hz, 1H), 4.80 (t,  $J$  = 6.7 Hz, 1H), 3.67 (s, 2H), 3.04-2.96 (m, 2H), 2.93-2.87 (m, 1H), 2.42 (s, 3H), 2.26 (s, 3H), 1.12 (d,  $J$  = 7.4 Hz, 3H) ppm;  $^{13}\text{C}$  NMR (150 MHz,  $\text{CDCl}_3$ )  $\delta$  209.3, 152.1, 145.4, 143.5, 136.9, 129.8, 127.0, 109.4, 106.6, 45.2, 44.8, 41.1, 21.5, 14.5, 13.5 ppm; IR ( $\text{CH}_2\text{Cl}_2$ ) 3377 (NH), 3069, 2926, 2857, 1712 (C=O), 1599, 1421, 1381, 1335, 1275, 1163, 1094  $\text{cm}^{-1}$ ; LRMS (EI, 20 eV)  $m/z$  335 ( $M^+$ , 10), 240 (8), 184 (38), 155 (68), 95 (100), 91 (92); HRMS (EI, 20 eV) Calculated for  $C_{17}H_{21}NO_4S$  ( $M^+$ ) 335.1191, Found 335.1186.

**Table 3, entry 7:**

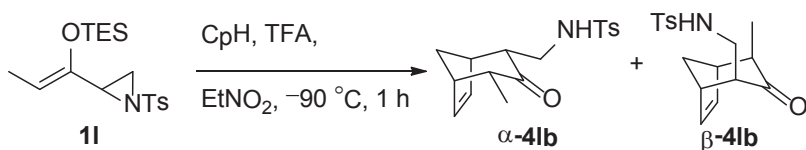

According to the general procedure for the cycloaddition reaction, aziridinyl enolsilane **11** (0.1826 g, 0.4968 mmol) in EtNO<sub>2</sub> (5.0 mL) was subjected to reaction with freshly cracked cyclopentadiene (0.210 mL, 2.54 mmol) and TFA (0.190 mL, 2.48 mmol) at -90 °C. After 1 h, aqueous NaHCO<sub>3</sub> was added and the reaction was worked up. The crude product was purified by flash column chromatography using 30% EtOAc in hexane to afford cycloadducts  $\alpha$ -**4lb** and  $\beta$ -**4lb** (0.1174 g, 74% yield, 51:49). Analytically pure samples of  $\alpha$ -**4lb** and  $\beta$ -**4lb** were obtained by further careful column chromatography using 1% acetone in CH<sub>2</sub>Cl<sub>2</sub>. **4-Methyl-N-(((1*R*\*,2*R*\*,4*R*\*,5*S*\*)-4-**

Supplementary Material (ESI) for Chemical Communications  
This journal is (c) The Royal Society of Chemistry 2013

**methyl-3-oxobicyclo[3.2.1]oct-6-en-2-yl)methyl)benzenesulfonamide ( $\alpha$ -4**lb**):** Colourless oil;  $R_f = 0.54$  ( $\text{CH}_2\text{Cl}_2$ );  $^1\text{H}$  NMR (500 MHz,  $\text{CDCl}_3$ )  $\delta$  7.72 (d,  $J = 8.2$  Hz, 2H), 7.30 (d,  $J = 8.2$  Hz, 2H), 6.04 (dd,  $J = 5.8, 2.9$  Hz, 1H), 5.96 (dd,  $J = 5.8, 2.7$  Hz, 1H), 5.26 (dd,  $J = 9.2, 4.0$  Hz, 1H), 2.96 (ddd,  $J = 12.6, 9.2, 4.4$  Hz, 1H), 2.86 (ddd,  $J = 12.7, 8.6, 4.3$  Hz, 1H), 2.81 (ddd,  $J = 5.4, 2.7, 2.7$  Hz, 1H), 2.74 (ddd,  $J = 5.3, 2.8, 2.8$  Hz, 1H), 2.68 (dddd,  $J = 7.7, 7.7, 4.1, 3.1$  Hz, 1H), 2.49 (qd,  $J = 6.9, 3.0$  Hz, 1H), 2.42 (s, 3H), 2.13 (ddd,  $J = 10.8, 5.4, 5.4$  Hz, 1H), 1.94 (d,  $J = 10.8$  Hz, 1H), 0.97 (t, 6.9 Hz, 3H) ppm;  $^{13}\text{C}$  NMR (125 MHz,  $\text{CDCl}_3$ )  $\delta$  212.9, 143.3, 137.1, 135.6, 134.9, 129.8, 127.0, 55.7, 50.1, 46.4, 44.6, 44.0, 43.5, 21.5, 13.7 ppm; IR ( $\text{CH}_2\text{Cl}_2$ ) 3339 (NH), 3069, 2943, 2872, 1701 (C=O), 1599, 1454, 1354, 1159, 1094  $\text{cm}^{-1}$ ; LRMS (EI, 20 eV)  $m/z$  321 ( $\text{M}^+$ , 3), 184 (5), 171 (21), 155 (39), 136 (35), 91 (100); HRMS (EI, 20 eV) Calculated for  $\text{C}_{17}\text{H}_{21}\text{NO}_3\text{S}$  ( $\text{M}^+$ ) 319.1242, Found 319.1234.

**4-Methyl-N-(((1*S*\*,2*R*\*,4*R*\*,5*R*\*)-4-methyl-3-oxobicyclo[3.2.1]oct-6-en-2-yl)methyl)benzene-sulfonamide ( $\beta$ -4**lb**):** White solid; mp: 107-109 °C;  $R_f = 0.34$  ( $\text{CH}_2\text{Cl}_2$ );  $^1\text{H}$  NMR (500 MHz,  $\text{CDCl}_3$ )  $\delta$  7.72 (d,  $J = 8.2$  Hz, 2H), 7.29 (d,  $J = 8.3$  Hz, 2H), 6.09 (dd,  $J = 5.6, 2.8$  Hz, 1H), 6.00 (dd,  $J = 5.8, 2.9$  Hz, 1H), 5.08 (dd,  $J = 8.1, 3.1$  Hz, 1H), 3.10 (ddd,  $J = 12.5, 8.3, 6.7$  Hz, 1H), 2.98 (ddd,  $J = 12.4, 8.4, 3.5$  Hz, 1H), 2.69-2.67 (m, 1H), 2.51-2.50 (m, 1H), 2.42 (s, 3H), 2.29-2.21 (m, 2H), 1.83-1.78 (m, 2H), 1.02 (d,  $J = 7.5$  Hz, 3H) ppm;  $^{13}\text{C}$  NMR (125 MHz,  $\text{CDCl}_3$ )  $\delta$  216.4, 143.5, 137.7, 136.6, 136.1, 129.8, 127.1, 52.4, 48.3, 45.4, 43.8, 40.5, 32.5, 21.5, 18.2 ppm; IR ( $\text{CH}_2\text{Cl}_2$ ) 3349 (NH), 3069, 2988, 2942, 2876, 1697 (C=O), 1599, 1454, 1305, 1290, 1155  $\text{cm}^{-1}$ ; LRMS (EI, 20 eV)  $m/z$  319 ( $\text{M}^+$ , 1), 184 (4), 171 (21), 155 (38), 136 (28), 91 (100); HRMS (EI, 20 eV) Calculated for  $\text{C}_{17}\text{H}_{21}\text{NO}_3\text{S}$  ( $\text{M}^+$ ) 319.1242, Found 319.1231.

**Table 3, entry 8:**

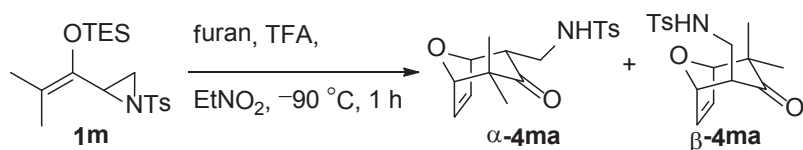

According to the general procedure for the cycloaddition reaction, aziridinyl enolsilane **1m** (0.3805 g, 0.9987 mmol) in  $\text{EtNO}_2$  (10 mL) was subjected to reaction with furan (0.36 mL, 5.0 mmol) and TFA (0.37 mL, 5.0 mmol) at  $-90$  °C. After 1 h, aqueous  $\text{NaHCO}_3$  was added and the reaction was worked up. The crude product was purified by flash column chromatography using 25%  $\text{EtOAc}$  in hexane to afford cycloadducts  $\alpha$ -4**ma** and  $\beta$ -4**ma** (0.2358 g, 71% yield, 93:7).

**N-(((1*R*\*,2*S*\*,5*S*\*)-4,4-Dimethyl-3-oxo-8-oxabicyclo[3.2.1]oct-6-en-2-yl)methyl)-4-methyl-benzenesulfonamide ( $\alpha$ -4**ma**):** White solid; mp: 133-136 °C;  $R_f = 0.43$  (35%  $\text{EtOAc}$  in hexane);  $^1\text{H}$  NMR (500 MHz,  $\text{C}_6\text{D}_6$ )  $\delta$  7.93 (d,  $J = 8.2$  Hz, 2H), 7.01 (d,  $J = 8.2$  Hz, 2H), 6.19 (dd,  $J = 6.1, 1.5$  Hz,

Supplementary Material (ESI) for Chemical Communications  
This journal is (c) The Royal Society of Chemistry 2013

1H), 5.98 (dd,  $J = 6.1, 1.5$  Hz, 1H), 5.76 (dd,  $J = 8.1, 5.4$  Hz, 1H), 4.97 (dd,  $J = 4.2, 1.5$  Hz, 1H), 4.23 (d,  $J = 1.5$  Hz, 1H), 3.19 (dt,  $J = 12.3, 5.5$  Hz, 1H), 3.08-2.99 (m, 2H), 2.07 (s, 3H), 1.21 (s, 3H), 0.84 (s, 3H) ppm;  $^{13}\text{C}$  NMR (125 MHz,  $\text{C}_6\text{D}_6$ )  $\delta$  211.8, 143.6, 138.2, 134.7, 133.5, 130.3, 127.7, 86.9, 80.4, 53.2, 51.6, 41.0, 24.8, 21.5, 20.0 ppm; IR ( $\text{CH}_2\text{Cl}_2$ ) 3344 (NH), 3064, 2968, 2944, 1703 (C=O), 1597  $\text{cm}^{-1}$ ; LRMS (EI, 20 eV)  $m/z$  335 ( $\text{M}^+$ , 2), 317 (1), 254 (5), 226 (8), 184 (10), 171 (24), 155 (46); HRMS (EI, 20 eV) Calculated for  $\text{C}_{17}\text{H}_{21}\text{NO}_4\text{S}$  ( $\text{M}^+$ ) 335.1186.

**N-(((1S\*,2S\*,5R\*)-4,4-Dimethyl-3-oxo-8-oxabicyclo[3.2.1]oct-6-en-2-yl)methyl)-4-methylbenzenesulfonamide ( $\beta$ -4ma):** White solid; mp: 122-124 °C;  $R_f = 0.33$  (35% EtOAc in hexane);  $^1\text{H}$  NMR (500 MHz,  $\text{C}_6\text{D}_6$ )  $\delta$  7.91 (d,  $J = 8.2$  Hz, 2H), 6.90 (d,  $J = 8.0$  Hz, 2H), 5.86 (dd,  $J = 6.1, 1.7$  Hz, 1H), 5.75 (dd,  $J = 6.1, 1.8$  Hz, 1H), 5.15 (dd,  $J = 6.9, 5.0$  Hz, 1H), 4.64 (d,  $J = 1.7$  Hz, 1H), 4.13 (d,  $J = 1.7$  Hz, 1H), 3.40-3.29 (m, 2H), 2.28 (t,  $J = 7.8$  Hz, 1H), 1.99 (s, 3H), 1.09 (s, 3H), 0.81 (s, 3H) ppm;  $^{13}\text{C}$  NMR (125 MHz,  $\text{C}_6\text{D}_6$ )  $\delta$  212.2, 143.3, 138.2, 134.4, 133.6, 130.1, 127.9, 86.1, 79.4, 54.5, 52.2, 45.1, 26.0, 21.4, 20.7 ppm; IR ( $\text{CH}_2\text{Cl}_2$ ) 3348 (NH), 3061, 2939, 1705 (C=O), 1598  $\text{cm}^{-1}$ ; LRMS (EI, 20 eV)  $m/z$  335 ( $\text{M}^+$ , 2), 254 (7), 226 (11), 184 (14), 171 (19), 164 (9) 155 (60); HRMS (EI, 20 eV) Calculated for  $\text{C}_{17}\text{H}_{21}\text{NO}_4\text{S}$  ( $\text{M}^+$ ) 335.1186, Found 335.1183.

**Table 3, entry 9:**

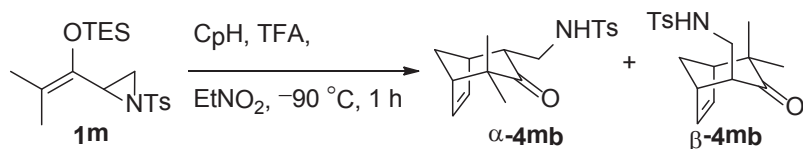

According to the general procedure for the cycloaddition reaction, aziridinyl enolsilane **1m** (0.3814 g, 1.001 mmol) in EtNO<sub>2</sub> (10 mL) was subjected to reaction with freshly cracked cyclopentadiene (0.41 mL, 5.0 mmol) and TFA (0.37 mL, 5.0 mmol) at -90 °C. After 1 h, aqueous NaHCO<sub>3</sub> was added and the reaction was worked up. The crude product was purified by flash column chromatography using 0.5% acetone in CH<sub>2</sub>Cl<sub>2</sub> to afford cycloadducts  $\alpha$ -4mb and  $\beta$ -4mb (0.2416 g, 72% yield, 50:50).

**N-(((1R\*,2R\*,5S\*)-4,4-Dimethyl-3-oxobicyclo[3.2.1]oct-6-en-2-yl)methyl)-4-methylbenzenesulfonamide ( $\alpha$ -4mb):** Colourless oil;  $R_f = 0.50$  ( $\text{CH}_2\text{Cl}_2$ );  $^1\text{H}$  NMR (500 MHz,  $\text{C}_6\text{D}_6$ )  $\delta$  7.82 (d,  $J = 8.2$  Hz, 2H), 6.82 (d,  $J = 8.0$  Hz, 2H), 5.78 (dd,  $J = 5.8, 2.7$  Hz, 1H), 5.73 (dd,  $J = 5.8, 2.7$  Hz, 1H), 5.58 (dd,  $J = 8.7, 4.4$  Hz, 1H), 3.09-3.04 (m, 1H), 2.98-2.92 (m, 1H), 2.52-2.49 (m, 1H), 2.45-2.43 (m, 1H), 1.98 (dd,  $J = 4.8, 2.7$  Hz, 1H), 1.90 (s, 3H), 1.71 (d,  $J = 11.3$  Hz, 1H), 1.59-1.55 (m, 1H), 0.89 (s, 3H), 0.84 (s, 3H) ppm;  $^{13}\text{C}$  NMR (125 MHz,  $\text{C}_6\text{D}_6$ )  $\delta$  215.3, 143.2, 138.7, 137.8, 134.9, 130.1, 127.7, 52.9, 51.4, 50.1, 44.2, 43.3, 39.7, 26.1, 24.3, 21.4 ppm; IR ( $\text{CH}_2\text{Cl}_2$ ) 3348 (NH), 3055, 2931,



Supplementary Material (ESI) for Chemical Communications  
This journal is (c) The Royal Society of Chemistry 2013

2877, 1697 (C=O), 1596, 1458  $\text{cm}^{-1}$ ; LRMS (EI, 20 eV)  $m/z$  333 ( $M^+$ , 9), 184 (10), 178 (29), 171 (11), 162 (14), 155 (52), 150 (49); HRMS (EI, 20 eV) Calculated for  $C_{18}H_{23}NO_3S$  ( $M^+$ ) 333.1393, Found 333.1391. **N-(((1*S*\*,2*R*\*,5*R*\*)-4,4-Dimethyl-3-oxobicyclo[3.2.1]oct-6-en-2-yl)methyl)-4-methylbenzenesulfonamide ( $\beta$ -4mb):** Colourless oil;  $R_f$  = 0.35 ( $\text{CH}_2\text{Cl}_2$ );  $^1\text{H}$  NMR (500 MHz,  $\text{C}_6\text{D}_6$ )  $\delta$  7.85 (d,  $J$  = 8.2 Hz, 2H), 6.83 (d,  $J$  = 8.0 Hz, 2H), 5.81 (dd,  $J$  = 5.7, 2.8 Hz, 1H), 5.72 (dd,  $J$  = 5.7, 2.9 Hz, 1H), 5.52 (dd,  $J$  = 7.5, 4.5 Hz 1H), 3.20-3.06 (m, 2H), 2.50 (br s, 1H), 2.22-2.18 (m, 1H), 1.95 (dd,  $J$  = 5.1, 2.8 Hz, 1H), 1.90 (s, 3H), 1.79 (d,  $J$  = 11.9 Hz, 1H), 1.58-1.53 (m, 1H), 0.88 (s, 3H), 0.82 (s, 3H) ppm;  $^{13}\text{C}$  NMR (125 MHz,  $\text{C}_6\text{D}_6$ )  $\delta$  216.8, 143.3, 138.4, 137.4, 136.8, 130.1, 127.8, 53.3, 50.8, 49.5, 46.1, 40.8, 34.4, 27.6, 25.0, 21.4 ppm; IR ( $\text{CH}_2\text{Cl}_2$ ) 3332 (NH), 3055, 2931, 1697 (C=O), 1596, 1465  $\text{cm}^{-1}$ ; LRMS (EI, 20 eV)  $m/z$  333 ( $M^+$ , 1), 226 (1), 184 (11), 178 (43), 155 (59), 150 (60); HRMS (EI, 20 eV) Calculated for  $C_{18}H_{23}NO_3S$  ( $M^+$ ) 333.1393, Found 333.1394.

### Asymmetric (4+3) Cycloadditions of Aziridinyl Enolsilanes

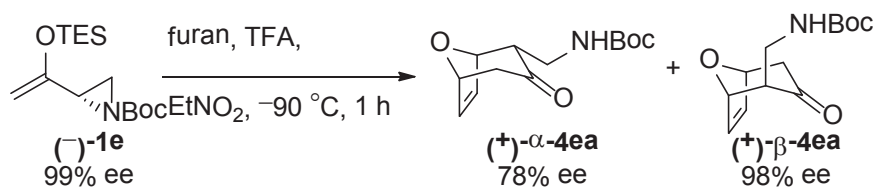

According to the general procedure for the cycloaddition reaction, aziridinyl enolsilane **(-)-1e** (0.1499 g, 0.5005 mmol) in EtNO<sub>2</sub> (5.0 mL) was subjected to reaction with furan (0.180 mL, 2.47 mmol) and TFA (0.045 mL, 0.59 mmol) at -90 °C. After 1 h, aqueous NaHCO<sub>3</sub> was added and the reaction was worked up. The crude product was purified by flash column chromatography using 25% EtOAc in hexane to afford cycloadducts **(+)- $\alpha$ -4ea** and **(+)- $\beta$ -4ea** (0.0674 g, 53% yield, 53:47). **tert-Butyl (((1*R*,2*S*,5*R*)-3-oxo-8-oxabicyclo[3.2.1]oct-6-en-2-yl)methyl)carbamate ((+)- $\alpha$ -4ea):**  $[\alpha]_D^{20} = +37.7^\circ$  ( $c = 0.54$ ,  $\text{CH}_2\text{Cl}_2$ ). The enantiomeric excess was determined by HPLC analysis [Daicel chiralpak AD-3, 0.5 mL/min,  $\lambda = 210$  nm, 10% IPA in hexane,  $t_R$ (major) = 21.09 min,  $t_R$ (minor) = 24.41 min] to be 78% ee. **tert-Butyl (((1*S*,2*S*,5*S*)-3-oxo-8-oxabicyclo[3.2.1]oct-6-en-2-yl)methyl)carbamate ((+)- $\beta$ -4ea):**  $[\alpha]_D^{20} = +77.1^\circ$  ( $c = 0.35$ ,  $\text{CH}_2\text{Cl}_2$ ). The enantiomeric excess was determined by HPLC analysis [Daicel chiralpak AD-3, 0.5 mL/min,  $\lambda = 210$  nm, 10% IPA in hexane,  $t_R$ (major) = 33.96 min,  $t_R$ (minor) = 25.63 min] to be 98% ee.

Supplementary Material (ESI) for Chemical Communications  
This journal is (c) The Royal Society of Chemistry 2013

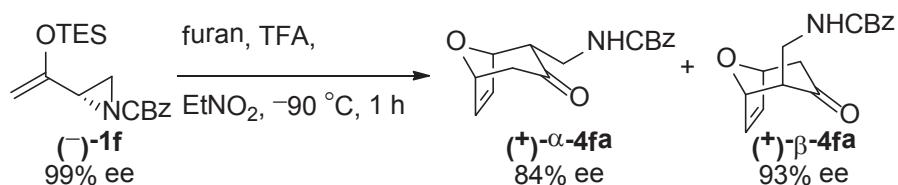

According to the general procedure for the cycloaddition reaction, aziridinyl enolsilane **(-)-1f** (0.0723 g, 0.217 mmol) in EtNO<sub>2</sub> (2.2 mL) was subjected to reaction with furan (0.080 mL, 1.10 mmol) and TFA (0.020 mL, 0.26 mmol) at -90 °C. After 1 h, aqueous NaHCO<sub>3</sub> was added and the reaction was worked up. The crude product was purified by flash column chromatography using 25% EtOAc in hexane to afford cycloadducts **(+)-α-4fa** and **(+)-β-4fa** (0.0393 g, 54% yield, 51:49).

**Benzyl (((1*R*,2*S*,5*R*)-3-oxo-8-oxabicyclo[3.2.1]oct-6-en-2-yl)methyl)carbamate ((+)-α-4fa):**  $[\alpha]_D^{20} = +26.9^\circ$  ( $c = 0.61$ , CH<sub>2</sub>Cl<sub>2</sub>). The enantiomeric excess was determined by HPLC analysis [Daicel chiralcel OD-3, 0.5 mL/min,  $\lambda = 210$  nm, 20% IPA in hexane,  $t_R$ (major) = 39.92 min,  $t_R$ (minor) = 36.11 min] to be 84% ee. **Benzyl (((1*S*,2*S*,5*S*)-3-oxo-8-oxabicyclo[3.2.1]oct-6-en-2-yl)methyl)carbamate ((+)-β-4fa):**  $[\alpha]_D^{20} = +58.0^\circ$  ( $c = 0.25$ , CH<sub>2</sub>Cl<sub>2</sub>). The enantiomeric excess was determined by HPLC analysis [Daicel chiralcel OD-3, 0.5 mL/min,  $\lambda = 210$  nm, 20% IPA in hexane,  $t_R$ (major) = 40.81 min,  $t_R$ (minor) = 36.29 min] to be 93% ee.

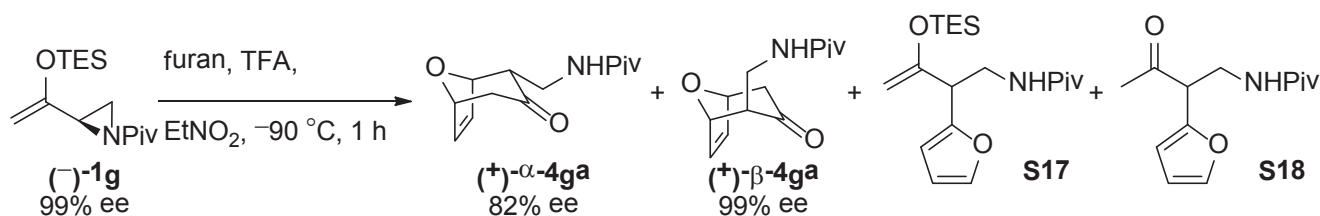

According to the general procedure for the cycloaddition reaction, aziridinyl enolsilane **(-)-1g** (0.1419 g, 0.5006 mmol) in EtNO<sub>2</sub> (5.0 mL) was subjected to reaction with furan (0.180 mL, 2.47 mmol) and TFA (0.045 mL, 0.59 mmol) at -90 °C. After 1 h, aqueous NaHCO<sub>3</sub> was added and the reaction was worked up. The crude product was purified by flash column chromatography using 40% EtOAc in hexane to afford cycloadducts **(+)-α-4ga** and **(+)-β-4ga** (0.0463 g, 39% yield, 49:51) and alkylation product **S16** (0.0475 g, 27% yield) and **S17** (0.0169 g, 14% yield). **N-(((1*R*,2*S*,5*R*)-3-Oxo-8-oxabicyclo[3.2.1]oct-6-en-2-yl)methyl)pivalamide ((+)-α-4ga):**  $[\alpha]_D^{20} = +8.5^\circ$  ( $c = 0.41$ , CH<sub>2</sub>Cl<sub>2</sub>). The enantiomeric excess was determined by HPLC analysis [Daicel chiralpak AD-3, 0.5 mL/min,  $\lambda = 210$  nm, 10% IPA in hexane,  $t_R$ (major) = 26.29 min,  $t_R$ (minor) = 24.70 min] to be 82% ee. **N-(((1*S*,2*S*,5*S*)-3-Oxo-8-oxabicyclo[3.2.1]oct-6-en-2-yl)methyl)pivalamide ((+)-β-4ga):**  $[\alpha]_D^{20} = +49.2^\circ$  ( $c = 0.50$ , CH<sub>2</sub>Cl<sub>2</sub>). The enantiomeric excess

Supplementary Material (ESI) for Chemical Communications  
This journal is (c) The Royal Society of Chemistry 2013

was determined by HPLC analysis [Daicel chiralpak AD-3, 0.5 mL/min,  $\lambda = 210$  nm, 10% IPA in hexane,  $t_R(\text{major}) = 28.74$  min,  $t_R(\text{minor}) = 22.37$  min] to be 99% ee.

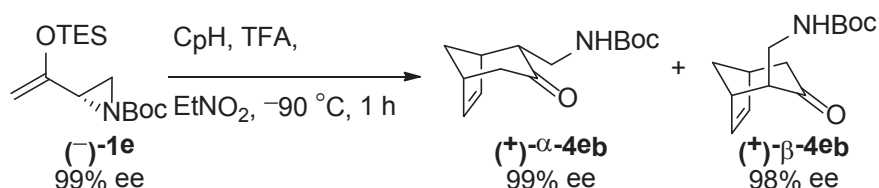

According to the general procedure for the cycloaddition reaction, aziridinyl enolsilane **(-)-1e** (0.1497 g, 0.4987 mmol) in EtNO<sub>2</sub> (5.0 mL) was subjected to reaction with freshly cracked cyclopentadiene (0.210 mL, 2.54 mmol) and TFA (0.045 mL, 0.59 mmol) at -90 °C. After 1 h, aqueous NaHCO<sub>3</sub> was added and the reaction was worked up. The crude product was purified by flash column chromatography using 20% EtOAc in hexane to afford cycloadducts **(+)-α-4eb** and **(+)-β-4eb** (0.0938 g, 75% yield, 59:41). Analytically pure samples of **(+)-α-4eb** and **(+)-β-4eb** were obtained by further careful column chromatography using 1% acetone in CH<sub>2</sub>Cl<sub>2</sub>. **tert-Butyl (((1R,2R,5R)-3-oxobicyclo[3.2.1]oct-6-en-2-yl)methyl)carbamate ((+)-α-4eb)**:  $[\alpha]_D^{20} = +23.8^\circ$  ( $c = 1.76$ , CH<sub>2</sub>Cl<sub>2</sub>). The enantiomeric excess was determined by HPLC analysis [Daicel chiralpak AY-3, 0.5 mL/min,  $\lambda = 210$  nm, 10% IPA in hexane,  $t_R(\text{major}) = 18.14$  min,  $t_R(\text{minor}) = 16.28$  min] to be 99% ee. **tert-Butyl (((1S,2R,5S)-3-oxobicyclo[3.2.1]oct-6-en-2-yl)methyl)carbamate ((+)-β-4eb)**:  $[\alpha]_D^{20} = +44.8^\circ$  ( $c = 0.98$ , CH<sub>2</sub>Cl<sub>2</sub>). The enantiomeric excess was determined by HPLC analysis [Daicel chiralpak AY-3, 0.5 mL/min,  $\lambda = 210$  nm, 10% IPA in hexane,  $t_R(\text{major}) = 16.53$  min,  $t_R(\text{minor}) = 19.83$  min] to be 98% ee.

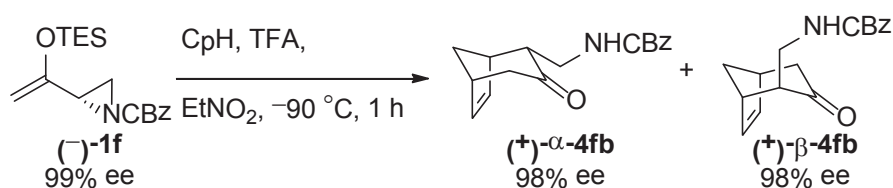

According to the general procedure for the cycloaddition reaction, aziridinyl enolsilane **(-)-1f** (0.0728 g, 0.218 mmol) in EtNO<sub>2</sub> (2.2 mL) was subjected to reaction with freshly cracked cyclopentadiene (0.090 mL, 1.1 mmol) and TFA (0.020 mL, 0.26 mmol) at -90 °C. After 1 h, aqueous NaHCO<sub>3</sub> was added and the reaction was worked up. The crude product was purified by flash column chromatography using 20% EtOAc in hexane to afford cycloadducts **(+)-α-4fb** and **(+)-β-4fb** (0.0494 g, 79% yield, 58:42). Analytically pure samples of **(+)-α-4fb** and **(+)-β-4fb** were obtained by further careful column chromatography using 1% acetone in CH<sub>2</sub>Cl<sub>2</sub>. **Benzyl**

Supplementary Material (ESI) for Chemical Communications  
This journal is (c) The Royal Society of Chemistry 2013

**(((1*R*,2*R*,5*R*)-3-oxobicyclo[3.2.1]oct-6-en-2-yl)methyl)carbamate ((+)- $\alpha$ -4fb):**  $[\alpha]_D^{20} = +24.1^\circ$  ( $c = 0.89$ ,  $\text{CH}_2\text{Cl}_2$ ). The enantiomeric excess was determined by HPLC analysis [Daicel chiralcel OD-3, 0.5 mL/min,  $\lambda = 210$  nm, 16% IPA in hexane,  $t_R(\text{major}) = 31.48$  min,  $t_R(\text{minor}) = 24.78$  min] to be 98% ee. **Benzyl (((1*S*,2*R*,5*S*)-3-oxobicyclo[3.2.1]oct-6-en-2-yl)methyl)carbamate ((+)- $\beta$ -4fb):**  $[\alpha]_D^{20} = +29.3^\circ$  ( $c = 0.63$ ,  $\text{CH}_2\text{Cl}_2$ ). The enantiomeric excess was determined by HPLC analysis [Daicel chiralcel OD-3, 0.5 mL/min,  $\lambda = 210$  nm, 16% IPA in hexane,  $t_R(\text{major}) = 27.70$  min,  $t_R(\text{minor}) = 26.18$  min] to be 98% ee.

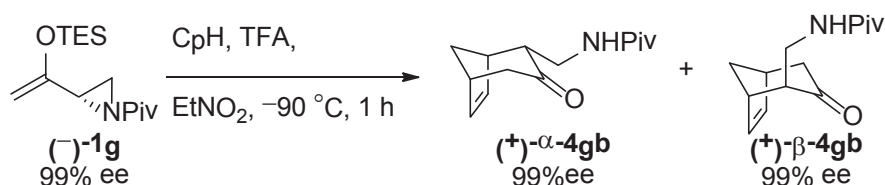

According to the general procedure for the cycloaddition reaction, aziridinyl enolsilane (-)-1g (0.1418 g, 0.5002 mmol) in EtNO<sub>2</sub> (5.0 mL) was subjected to reaction with freshly cracked cyclopentadiene (0.210 mL, 2.54 mmol) and TFA (0.045 mL, 0.59 mmol) at -90 °C. After 1 h, aqueous NaHCO<sub>3</sub> was added and the reaction was worked up. The crude product was purified by flash column chromatography using 30% EtOAc in hexane to afford cycloadducts (+)- $\alpha$ -4gb (0.0225 g, 14% yield) and (+)- $\beta$ -4gb (0.0238 g, 20% yield). **N-(((1*R*,2*R*,5*R*)-3-Oxobicyclo[3.2.1]oct-6-en-2-yl)methyl)pivalamide ((+)- $\alpha$ -4gb):**  $[\alpha]_D^{20} = +12.5^\circ$  ( $c = 0.27$ ,  $\text{CH}_2\text{Cl}_2$ ). The enantiomeric excess was determined by HPLC analysis [Daicel chiralpak AD-3, 0.5 mL/min,  $\lambda = 210$  nm, 4% IPA in hexane,  $t_R(\text{major}) = 28.57$  min,  $t_R(\text{minor}) = 27.11$  min] to be 99% ee. **N-(((1*S*,2*R*,5*S*)-3-Oxobicyclo[3.2.1]oct-6-en-2-yl)methyl)pivalamide ((+)- $\beta$ -4gb):**  $[\alpha]_D^{20} = +25.0^\circ$  ( $c = 0.16$ ,  $\text{CH}_2\text{Cl}_2$ ). The enantiomeric excess was determined by HPLC analysis [Daicel chiralpak AD-3, 0.5 mL/min,  $\lambda = 210$  nm, 6% IPA in hexane,  $t_R(\text{major}) = 17.10$  min,  $t_R(\text{minor}) = 19.46$  min] to be 99% ee.

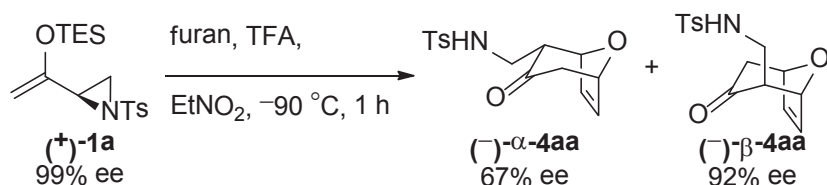

According to the general procedure for the cycloaddition reaction, aziridinyl enolsilane (+)-1a (0.3539 g, 1.002 mmol) in EtNO<sub>2</sub> (10 mL) was subjected to reaction with furan (0.36 mL, 5.0 mmol) and TFA (0.37 mL, 5.0 mmol) at -90 °C. After 1 h, aqueous NaHCO<sub>3</sub> was added and the reaction

Supplementary Material (ESI) for Chemical Communications  
This journal is (c) The Royal Society of Chemistry 2013

was worked up. The crude product was purified by flash column chromatography using 35% EtOAc in hexane to afford cycloadducts (–)-**α-4aa** and (–)-**β-4aa** (0.3048 g, 99% yield, 55:45).

**4-Methyl-N-(((1*S*,2*R*,5*S*)-3-oxo-8-oxabicyclo[3.2.1]oct-6-en-2-yl)methyl)benzenesulfonamide**

**((–)-**α-4aa**)**. The enantiomeric excess was determined by HPLC analysis [Daicel chiralpak AS-3, 0.25 mL/min,  $\lambda = 254$  nm, 80% IPA in hexane,  $t_R(\text{major}) = 53.80$  min,  $t_R(\text{minor}) = 44.77$  min] to be 67% ee.

**4-Methyl-N-(((1*R*,2*R*,5*R*)-3-oxo-8-oxabicyclo[3.2.1]oct-6-en-2-yl)methyl)benzenesulfonamide** **((–)-**β-4aa**)**: The enantiomeric excess was determined by HPLC analysis [Daicel chiralpak AS-3, 0.25 mL/min,  $\lambda = 254$  nm, 80% IPA in hexane,  $t_R(\text{major}) = 77.38$  min,  $t_R(\text{minor}) = 66.52$  min] to be 88% ee.

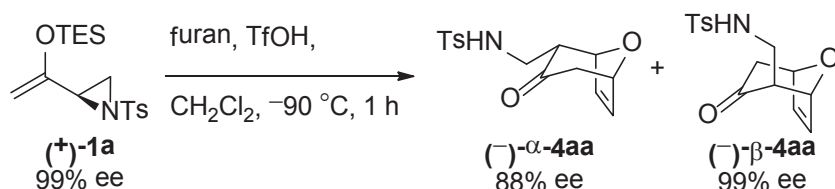

According to the general procedure for the cycloaddition reaction, aziridinyl enolsilane (+)-**1a** (0.3521 g, 0.9975 mmol) in CH<sub>2</sub>Cl<sub>2</sub> (10 mL) was subjected to reaction with furan (0.36 mL, 5.0 mmol) and TfOH (0.100 mL, 1.13 mmol) at –90 °C. After 1 h, aqueous NaHCO<sub>3</sub> was added and the reaction was worked up. The crude product was purified by flash column chromatography using 35% EtOAc in hexane to afford cycloadducts (–)-**α-4aa** and (–)-**β-4aa** (0.1715 g, 56% yield, 60:40).

**4-Methyl-N-(((1*S*,2*R*,5*S*)-3-oxo-8-oxabicyclo[3.2.1]oct-6-en-2-yl)methyl)benzenesulfonamide**

**((–)-**α-4aa**)**:  $[\alpha]_D^{20} = -23.4^\circ$  ( $c = 1.19$ , CHCl<sub>3</sub>). The enantiomeric excess was determined by HPLC analysis [Daicel chiralpak AS-3, 0.25 mL/min,  $\lambda = 254$  nm, 80% IPA in hexane,  $t_R(\text{major}) = 53.88$  min,  $t_R(\text{minor}) = 44.48$  min] to be 92% ee.

**4-Methyl-N-(((1*R*,2*R*,5*R*)-3-oxo-8-oxabicyclo[3.2.1]oct-6-en-2-yl)methyl)benzenesulfonamide**

**((–)-**β-4aa**)**:  $[\alpha]_D^{20} = -96.7^\circ$  ( $c = 0.43$ , CHCl<sub>3</sub>). The enantiomeric excess was determined by HPLC analysis [Daicel chiralpak AS-3, 0.25 mL/min,  $\lambda = 254$  nm, 80% IPA in hexane,  $t_R(\text{major}) = 77.47$  min,  $t_R(\text{minor}) = 65.45$  min] to be 99% ee.

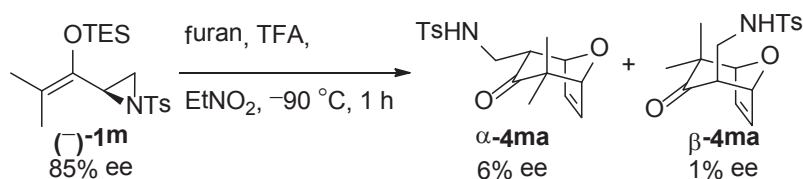

Supplementary Material (ESI) for Chemical Communications  
This journal is (c) The Royal Society of Chemistry 2013

According to the general procedure for the cycloaddition reaction, aziridinyl enolsilane (**(-)-1m**) (0.3805 g, 0.9987 mmol) in EtNO<sub>2</sub> (10 mL) was subjected to reaction with furan (0.36 mL, 5.0 mmol) and TFA (0.37 mL, 5.0 mmol) at -90 °C. After 1 h, aqueous NaHCO<sub>3</sub> was added and the reaction was worked up. The crude product was purified by flash column chromatography using 25% EtOAc in hexane to afford cycloadducts **α-4ma** and **β-4ma** (0.2358 g, 71% yield, 93:7). **N-(((1S,2R,5R)-4,4-Dimethyl-3-oxo-8-oxabicyclo[3.2.1]oct-6-en-2-yl)methyl)-4-methylbenzenesulfonamide (α-4ma)**: The enantiomeric excess was determined by HPLC analysis [Daicel chiralpak AD-H, 1.0 mL/min, λ = 254 nm, 15% IPA in hexane, t<sub>R</sub>(major) = 27.69 min, t<sub>R</sub>(minor) = 33.12 min] to be 6% ee. **N-(((1R,2R,5S)-4,4-Dimethyl-3-oxo-8-oxabicyclo[3.2.1]oct-6-en-2-yl)methyl)-4-methylbenzenesulfonamide (β-4ma)**: The enantiomeric excess was determined by HPLC analysis [Daicel chiralcel OD-3, 0.5 mL/min, λ = 254 nm, 40% IPA in hexane, t<sub>R</sub>(major) = 11.21 min, t<sub>R</sub>(minor) = 12.93 min] to be 1% ee.

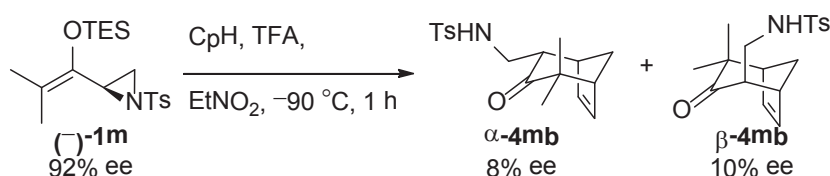

According to the general procedure for the cycloaddition reaction, aziridinyl enolsilane (**(-)-1m**) (0.3814 g, 1.001 mmol) in EtNO<sub>2</sub> (10 mL) was subjected to reaction with freshly cracked cyclopentadiene (0.41 mL, 5.0 mmol) and TFA (0.37 mL, 5.0 mmol) at -90 °C. After 1 h, aqueous NaHCO<sub>3</sub> was added and the reaction was worked up. The crude product was purified by flash column chromatography using 0.5% acetone in CH<sub>2</sub>Cl<sub>2</sub> to afford cycloadducts **α-4mb** and **β-4mb** (0.2416 g, 72% yield, 50:50). **N-(((1S,2S,5R)-4,4-Dimethyl-3-oxobicyclo[3.2.1]oct-6-en-2-yl)methyl)-4-methylbenzenesulfonamide (α-4mb)**: The enantiomeric excess was determined by HPLC analysis [Daicel chiralpak AD-3, 0.5 mL/min, λ = 254 nm, 30% IPA in hexane, t<sub>R</sub>(major) = 28.68 min, t<sub>R</sub>(minor) = 21.80 min] to be 8% ee. **N-(((1R,2S,5S)-4,4-Dimethyl-3-oxobicyclo[3.2.1]oct-6-en-2-yl)methyl)-4-methylbenzenesulfonamide (β-4mb)**: The enantiomeric excess was determined by HPLC analysis [Daicel chiralpak AY-3, 0.5 mL/min, λ = 254 nm, 40% IPA in hexane, t<sub>R</sub>(major) = 60.89 min, t<sub>R</sub>(minor) = 30.97 min] to be 10% ee.
